1 **Evolution of cation binding in the active sites of P-loop nucleoside**  
2 **triphosphatases**

3 Daria N. Shalaeva<sup>a,b,c</sup>, Dmitry A. Cherepanov<sup>b,d</sup>, Michael Y. Galperin<sup>e</sup>, Armen Y.  
4 Mulkidjanian<sup>a,b,c,1</sup>

5 <sup>a</sup> School of Physics, University of Osnabrück, D-49069 Osnabrück, Germany

6 <sup>b</sup> A.N. Belozersky Institute of Physico-Chemical Biology, Lomonosov Moscow State University,  
7 Moscow 119992, Russia

8 <sup>c</sup> School of Bioengineering and Bioinformatics, Lomonosov Moscow State University, Moscow  
9 119992, Russia

10 <sup>d</sup> Semenov Institute of Chemical Physics, Russian Academy of Sciences, Moscow 119991, Russia

11 <sup>e</sup> National Center for Biotechnology Information, National Library of Medicine, National Institutes  
12 of Health, Bethesda, Maryland 20894, USA

13

14

15 <sup>1</sup>**For correspondence:** Armen Y. Mulkidjanian, School of Physics, University of Osnabrück, D-  
16 49069, Osnabrück, Germany. Tel. +49-541-969-2698; E-mail: amulkid@uos.de

17

18 E-mail addresses:

19 Daria N. Shalaeva, dshalaeva@uos.de, ORCID: 0000-0003-0582-2612

20 Dmitry A. Cherepanov, tscherepanov@gmail.com ORCID: 0000-0001-6286-4638

21 Michael Y. Galperin, galperin@ncbi.nlm.nih.gov, ORCID: 0000-0002-2265-5572

22 Armen Y. Mulkidjanian, amulkid@uos.de, ORCID: 0000-0001-5844-3064

23

24

25

26 **Abstract**

27 The activity of cellular nucleoside triphosphatases (NTPases) must be tightly controlled to prevent  
28 spontaneous ATP hydrolysis leading to cell death. While most P-loop NTPases require activation by  
29 arginine or lysine fingers, some of the apparently ancestral ones are, instead, activated by potassium  
30 ions, but not by sodium ions. We combined comparative structure analysis of P-loop NTPases of  
31 various classes with molecular dynamics (MD) simulations of Mg-ATP complexes in water and in  
32 the presence of potassium, sodium, or ammonium ions. In all analyzed structures, the conserved P-  
33 loop motif keeps the triphosphate chains of enzyme-bound NTPs in an extended, catalytically prone  
34 conformation, similar to that attained by ATP in water in the presence of potassium or ammonium  
35 ions bound between alpha- and gamma-phosphate groups. The smaller sodium ions could not reach  
36 both alpha- and gamma-phosphates of a protein-bound extended phosphate chain and therefore are  
37 unable to activate most potassium-dependent P-loop NTPases.

38

39

## 40 **Introduction**

41 P-loop nucleoside triphosphatases (NTPases) represent the most common protein fold that can  
42 comprise up to 18% of all gene products in a cell (1-4). P-loop NTPase domains, which apparently  
43 preceded the Last Universal Cellular Ancestor (4-10), are found in translation factors, small  
44 GTPases, kinases, helicases, rotary ATP synthases, and many other ubiquitous proteins.

45 The P-loop fold, a variation of the Rossman fold, is a 3-layer  $\alpha\beta\alpha$  sandwich, where the N-terminal  $\beta$ -  
46 strand is connected with the following  $\alpha$ -helix by an elongated flexible loop typically containing the  
47 GxxxxGK[ST] sequence motif, known as the Walker A motif (11), see Fig. 1. This motif is  
48 responsible for binding the NTP's phosphate chain and is often referred to as the P-loop (phosphate-  
49 binding loop) motif (12). The conserved lysine residue of the P-loop forms hydrogen bonds (H-  
50 bonds) with  $\beta$ - and  $\gamma$ -phosphate groups, while the following Ser/Thr residue coordinates the  $Mg^{2+}$   
51 ion, which, in turn, coordinates  $\beta$ - and  $\gamma$ -phosphates from the other side of the phosphate chain (Fig.  
52 1A-C). Another motif typical for P-loop proteins is the Walker B motif with the sequence pattern  
53 hhhhD, where "h" denotes a hydrophobic residue (11). In P-loop NTPases, the aspartate from this  
54 motif either serves as a direct  $Mg^{2+}$  ligand or participates in the second coordination sphere of  $Mg^{2+}$ .  
55 Further specific motifs are shown in Fig. 1.

56 Catalytic activity of P-loop NTPases usually requires interaction with other proteins or domains that  
57 insert activating Arg or Lys "fingers" in the catalytic site (13), see Fig. 1A. Some P-loop NTPases,  
58 instead, functionally depend on monovalent cations (14-20) (Fig. 1B, C, Table S1). Strict  
59 dependence on  $K^+$  ions was shown, among others, for the bacterial tRNA-modifying GTPase MnmE  
60 (also known as TrmE), Era-like GTPase Der from *Escherichia coli*, *AtNOS/AtNOA1* GTPase from  
61 *Arabidopsis thaliana*, ribosome assembly GTPase YqeH, G-protein coupled with ferrous transporter

62 FeoB, ribosome-binding ATPase YchF, bacterial ribosome biogenesis protein RgbA, and the DNA  
63 repair and recombination protein Rad51 (15-18, 21-29). The requirement for  $K^+$  or  $NH_4^+$  ions was  
64 shown both for the intrinsic and ribosome-dependent GTPase activity of several ubiquitous  
65 translation factors (30-37). Based on the  $K^+$ -dependence of several ancient ATPases and GTPases of  
66 the TRAFAC class, we have previously suggested that it was an ancestral trait which was  
67 subsequently replaced by reliance on arginine or lysine fingers (38, 39).

68 In  $K^+$ -dependent P-loop NTPases, the catalytically important  $K^+$  ion occupies the position of the  
69 positively charged nitrogen atom of the Arg/Lys finger, interacting with the phosphate groups of the  
70 NTP molecule from the opposite side of the  $Mg^{2+}$  ion (15, 20), see also Fig. 1. Using crystal  
71 structures of several related  $K^+$ -dependent P-loop NTPases, a set of their characteristic features  
72 could be identified, including a specific  $K^+$ -binding "K-loop" and two specific Asn/Asp residues in  
73 the P-loop (18, 20, 38) (Fig. 1B, C). Still, the molecular mechanism(s) of activation of P-loop  
74 NTPases either by Arg or Lys fingers or by monovalent cations (hereafter  $M^+$  ions) remain  
75 unresolved, see (40-44) for recent reviews.

76 In the majority of  $K^+$ -dependent P-loop NTPases,  $Na^+$  ions could not replace  $K^+$  ions as cofactors  
77 (17, 21-23, 25, 26). The very existence of ubiquitous  $K^+$ -dependent NTPases, along with the strict  
78 dependence of the translation system on cytoplasmic  $K^+$  ions and its inhibition by  $Na^+$  ions (32),  
79 require maintaining the  $[K^+]/[Na^+]$  ratio  $\gg 1.0$  in the cytoplasm. Since  $Na^+$  usually prevails over  $K^+$   
80 in natural habitats, cells may spend up to a half of the available energy to maintain the proper  
81  $[K^+]/[Na^+]$  ratio (45). It has been argued that the first cells emerged in  $K^+$ -rich environments, which  
82 could explain the  $K^+$  dependence of the evolutionarily old cell processes (38). However, it has  
83 remained obscure why, in the course of evolution, the cellular machinery has not switched its  
84 specificity from  $K^+$  to  $Na^+$ , considering the obvious similarity of  $K^+$  and  $Na^+$  ions and the abundance  
85 of  $Na^+$  in natural habitats (46). Such adaptation would have been widely beneficial, especially in the

86 case of marine organisms, which invest large efforts into counteracting the  $[K^+]/[Na^+]$  ratio of  $\sim 0.02$   
87 in the sea water (47). For P-loop NTPases, the use of  $Na^+$  ion as an activating cofactor is, in  
88 principle, possible: human dynamin and the dynamin-like protein from *A. thaliana* are equally well  
89 activated by  $Na^+$  and  $K^+$  ions (48, 49). The structures of dynamins show that  $Na^+$  ions bind in a  
90 similar position to that occupied by  $K^+$  ions in potassium-dependent NTPases (20), *cf.* Fig. 1B and  
91 1C. Therefore, the strong preference of other NTPases for  $K^+$  ions remains a mystery.

92 The specific role of  $K^+$  ions in processing phosphoanhydride bonds has been documented also in the  
93 absence of enzymes. Back in 1960, larger ions, such as  $K^+$  and  $Rb^+$ , were shown to be more efficient  
94 than the smaller  $Na^+$  and  $Li^+$  ions in accelerating transphosphorylation (50), see Table S2. These  
95 observations suggested that the observed catalytic effect of the positive charges of Arg/Lys fingers  
96 or  $K^+$  ions could be determined by the size of these cations.

97 So far, computational studies of the mechanisms of NTP hydrolysis in water have been conducted  
98 using such model systems as methyl triphosphate molecule with and without  $Mg^{2+}$ , Mg-ATP  
99 complex, and Mg-GTP complex, see e.g. (51-55). To our knowledge, no computational studies of  
100 Mg-NTP complexes investigated the effects of monovalent cations.

101 Here, we performed evolutionary analysis of the conformations of NTPs and their analogs bound in  
102 the active sites of different families of P-loop NTPases and complemented this analysis with  
103 molecular dynamics (MD) simulations of the Mg-ATP complex in water in the presence of  $K^+$ ,  $Na^+$ ,  
104 and  $NH_4^+$  ions. We report that, in MD simulations,  $M^+$  ions got bound to the phosphate chain in the  
105 same two sites that are taken by positive charges in the active sites of P-loop NTPases, namely,  
106 between  $\beta$ - and  $\gamma$ -phosphates, in the position of the amino group of the invariant P-loop lysine, and  
107 between  $\alpha$ - and  $\gamma$ -phosphates, in the position that is occupied either by the side chain of the  
108 activating Arg/Lys finger or by an  $M^+$  ion. However, the extended conformation of the phosphate

109 chain, which is similar to the catalytically prone conformation of tightly bound Mg-ATP complexes  
110 in the active sites of P-loop NTPases, was achieved only in the presence of the larger  $K^+$  and  $NH_4^+$   
111 ions, but not with the smaller  $Na^+$  ions. In addition, the comparative structural analysis has revealed  
112 that although the activating  $M^+$  ions are bound exclusively by the residues of the P-loop NTPase  
113 domain, the activation of respective NTPases additionally requires a specific interaction of the P-  
114 loop domain with the respective activating moiety (another protein domain or an RNA/DNA  
115 molecule) to shape the cation-binding site. Such a mechanism prevents uncontrolled hydrolysis of  
116 the cellular ATP stock, which, otherwise, could cause cell death.

117

## 118 **Results**

### 119 *Cation binding to the $Mg^{2+}$ -ATP complex*

120 We have conducted a series of molecular dynamics (MD) simulations of the  $Mg^{2+}$ -ATP complex in  
121 water and in the presence of  $K^+$ ,  $Na^+$ , or  $NH_4^+$  ions (see Methods and Table S3 for details).

122 As a starting point for the MD simulations, we chose the conformation of Mg-ATP complex with  
123 the  $Mg^{2+}$  ion coordinated by two non-bridging oxygen atoms of the  $\beta$ - and  $\gamma$ -phosphate groups and  
124 four water molecules (Fig. 1D). This mode of  $Mg^{2+}$  coordination, often referred to as bidentate or  $\beta\gamma$   
125 coordination, has been observed in NMR studies of the Mg-ATP complex in water (56-59) and in  
126 crystal structures of P-loop NTPases with bound NTPs and their analogs (11, 12, 60-62), see also  
127 Fig. 1. The initial structure of the Mg-ATP complex was optimized in vacuum using the PM3  
128 Hamiltonian. After that, 1,200 water molecules and 6 monovalent cations ( $K^+$ ,  $Na^+$  or  $NH_4^+$ ) were  
129 added to the Mg-ATP complex. In each case, 4  $Cl^-$  ions were added to balance the total charge of the  
130 simulation system. The resulting solution corresponded to the total ionic strength of 0.2 M. To

131 investigate the conformational space of the Mg-ATP complex in water, we performed three  
132 independent MD simulation runs of 170 ns for each system. During each simulation, the system  
133 coordinates were saved every 50 picoseconds, providing 10,000 conformational states (frames) for  
134 each system. For the visualization in Fig. 2A, we have selected every 100th simulation frame to  
135 sample the conformational states of the Mg-ATP complex with 5-ns intervals. The conformations  
136 were superposed to achieve the best possible match between coordinates of the phosphorus and ester  
137 oxygen atoms of the ATP phosphate chain.

138 Distance distributions obtained from the MD simulation data (Fig. S1) show that  $M^+$  ions formed  
139 coordination bonds with oxygen atoms of the ATP phosphate chain with the respective lengths of  
140 2.2 Å for  $Na^+$ , 2.6 Å for  $K^+$ , and 2.7 Å for  $NH_4^+$  ions. These distances correspond well with the  
141 crystallographic data for these ions (63-65). On time average, within the 4 Å radius around the  
142 phosphate chain, 1.5 cations were present in the case of  $Na^+$  and  $NH_4^+$ , and 0.75 cations were  
143 present in the case of  $K^+$  (Fig. S2). Based on the radial distributions of  $M^+$  ions around each  
144 individual oxygen atom of the ATP phosphate chain (Fig. S1) and visual inspection of the  $M^+$   
145 binding to the phosphate groups, at least two distinct binding sites for  $M^+$  ions could be identified  
146 (Fig. 2A). One of them was formed by the oxygen atoms of  $\beta$ - and  $\gamma$ -phosphates, and the other site  
147 involved the oxygens of  $\alpha$ - and  $\gamma$ -phosphates. We refer to these binding sites as the BG and AG  
148 sites, respectively. Additionally,  $M^+$  ions were often found close to the distal end of the phosphate  
149 chain, where they contacted one or more oxygen atoms of the  $\gamma$ -phosphate (the G site(s), Fig. 2A).

150 To characterize  $M^+$  binding in the AG and BG sites, we measured the distances from each  $M^+$  ion to  
151 the nearest oxygen atoms of the two respective phosphate residues ( $R^{AG}$  and  $R^{BG}$  distances in Fig.  
152 2B). Site occupancy was estimated, as shown in Fig. 2C-E, from the number of  $M^+$  ions located in  
153 the proximity of the binding site at each moment of the simulation. In the BG site, binding of any  
154  $M^+$  ion produced a prominent maximum in the  $R^{BG}$  distribution. The  $R^{BG}$  values peaked at the same

155 distance as the maxima of the distribution of distances to separate oxygens (Fig. S1), which  
156 indicates that the cations in the BG site simultaneously formed coordination bonds with two oxygen  
157 atoms. Similarly, in the AG site, the  $\text{NH}_4^+$  and  $\text{Na}^+$  ions produced peaks in the  $R^{\text{AG}}$  distribution plots  
158 with the maxima at 2.7 Å and 2.3 Å, respectively. For  $\text{K}^+$  ions, the corresponding peak with a  $R^{\text{AG}}$   
159 value of 2.6 Å was wide. Still, the distributions of the distances between cations and individual  
160 oxygen atoms of the triphosphate chain show that  $\alpha$ - and  $\gamma$ -phosphates had the most contacts with  
161  $\text{K}^+$  ions, see graphs for  $\text{O}^{2\text{A}}$  and  $\text{O}^{1\text{G}}$  in Fig. S1 (hereafter, the atom names follow the CHARMM  
162 naming scheme (66) and the recent IUPAC Recommendations (67), as shown in Fig. 1D and Fig.  
163 S1).

164 While occupying the same binding sites,  $\text{M}^+$  ions bound with different affinity that decreased in the  
165 order of  $\text{Na}^+ > \text{NH}_4^+ > \text{K}^+$  (Table S2). Higher affinity of ATP to  $\text{Na}^+$  ions, as compared to  $\text{K}^+$  and  
166  $\text{NH}_4^+$  ions, was previously observed in several experimental studies, albeit in the absence of  $\text{Mg}^{2+}$   
167 (Table S2). For each  $\text{M}^+$  ion, MD simulation data indicated much lower occupancy of the AG site  
168 than of the BG site; the average occupancy of the BG site was estimated to be 0.95 for  $\text{Na}^+$ , 0.72 for  
169  $\text{NH}_4^+$ , and 0.5 for  $\text{K}^+$ , compared to the average occupancy of the AG site of 0.15 for  $\text{Na}^+$ , 0.2 for  
170  $\text{NH}_4^+$ , and 0.05 for  $\text{K}^+$  (Fig. 2C-E).

171 The reasons for the weak  $\text{K}^+$ -binding in the AG site could be, in principle, clarified by structural and  
172 thermodynamic analysis of the conformations of the Mg-ATP complex with two  $\text{K}^+$  ions bound.  
173 Such an analysis, however, was hindered by the scarcity of the respective MD simulation frames.  
174 Therefore, we have conducted additional MD simulations with positional restraints applied to the  
175 cations. We have conducted 10-ns simulations of an ATP molecule with  $\text{Mg}^{2+}$  in the  $\beta\gamma$  coordination  
176 and  $\text{K}^+$  in the BG site, and of the same system but with the addition of the second  $\text{K}^+$  ion in the AG  
177 site. Positional restraints were applied to  $\text{K}^+$  and  $\text{Mg}^{2+}$  ions and to one of the atoms of the adenine  
178 base. Binding of the second  $\text{K}^+$  ion in the AG site was found to stabilize all three phosphate groups



179 in a near-eclipsed conformation, with the phosphorus-oxygen bonds of the  $\alpha$ -phosphate group  
180 almost coplanar to the respective bonds of  $\beta$ - and  $\gamma$ -phosphates (Fig. S3, Table S4). In this  
181 conformation, the distance between the oxygen atoms of  $\alpha$ - and  $\gamma$ -phosphates was short enough to  
182 accommodate the second  $K^+$  ion. As shown in Fig. S3, binding of the second  $K^+$  ion in the AG site  
183 promotes the transition of the phosphate chain into the almost fully eclipsed conformation by  
184 approximately 60 meV or 5.7 kJ/mol.

185 We were mostly interested in the  $\beta\gamma$  conformations of the Mg-ATP complex that are typical for P-  
186 loop NTPases. To sample enough  $\beta\gamma$  conformations, we have conducted an additional series of 25  
187 independent 20-ns long MD simulations, with and without  $M^+$  ions (Table 1). These data were used  
188 to define the shape of the phosphate chain of the  $\beta\gamma$ -coordinated Mg-ATP complex.

189

### 190 *Shape of the phosphate chain as inferred from the MD simulation data*

191 The MD simulation data were used to compare the geometry of the ATP phosphate chain in the  
192 presence and in the absence of different  $M^+$  ions.

193 Cleavage of the bond between  $\beta$ - and  $\gamma$ -phosphates is believed to proceed via a planar transition  
194 complex, whereby the  $P^B-O^{3B}-P^G$  angle widens (41, 44, 51-53, 68-70). Another important feature of  
195 the Mg-ATP complex is the curvature of the phosphate chain, which can be characterized by the  $P^A$ -  
196  $P^G$  distance (Fig. 1D).

197 In Fig. 3, values of the  $P^B-O^{3B}-P^G$  angle and  $P^A-P^G$  distance are plotted as a function of the  
198 simulation time.

199 Fig. 4 shows heat maps of the conformations seen in the MD simulations with the values of  $P^B-O^{3B}-$   
200  $P^G$  angle and  $P^A-P^G$  distance used as coordinates. The shading reflects the probability (normalized  
201 frequency) of conformations corresponding to the respective measurements.

202 During all simulations,  $P^A-P^G$  distances and  $P^B-O^{3B}-P^G$  angles fluctuated around a certain value for a  
203 while and then switched to another set of values; this behavior reflected periods of MD trajectories  
204 characterized by the same type of interaction between the  $Mg^{2+}$  ion and the triphosphate chain (Fig.  
205 3 and S4). The ATP molecules switched between the bidentate  $\beta\gamma$  conformation and the so-called  
206  $\alpha\beta\gamma$  conformations with the  $Mg^{2+}$  ion being coordinated by one oxygen atom from each phosphate  
207 group (tridentate coordination of  $Mg^{2+}$ ). The latter conformation is known from  $^{31}P$  NMR studies  
208 (58, 71) and some proteins (72, 73). In long (3x170 ns) simulations, several versions of the  $\alpha\beta\gamma$   
209 conformation could be seen, differing in the particular oxygen atoms of the phosphate chain  
210 involved in the tridentate coordination of the  $Mg^{2+}$  ion (Fig. S4).

211 In each of the sampled conformations, the Mg-ATP complex was characterized by distinct  $P^A-P^G$   
212 distances and  $P^B-O^{3B}-P^G$  angles, which depended on the nature of the added monovalent cation (Fig.  
213 3, Table 1). While all  $M^+$  ions seemed to contract the phosphate chain, it was more extended in the  
214 presence of  $K^+$  than in the presence of  $NH_4^+$  or  $Na^+$ . Furthermore,  $Na^+$  and  $NH_4^+$  ions could induce  
215 an even more compressed, curled conformation of the Mg-ATP complex with even shorter distances  
216 between  $P^A$  and  $P^G$  atoms. Such curled conformations of the phosphate chain were not observed  
217 either in the presence of  $K^+$  ions or in the absence of  $M^+$  ions (Fig. 3, Table 1).

218 In short MD simulations that started from the same  $\beta\gamma$  conformation (simulations 5-8 in Table S3),  
219 we did not observe significant differences in the lifetime of the  $\beta\gamma$  conformation between systems  
220 with different cations (Table S5). For the  $\beta\gamma$  conformation of the Mg-ATP complex, the largest  $P^A-$   
221  $P^G$  distances, up to 5.5 Å, were observed in simulations without  $M^+$  ions (Fig. 3, 4). Presence of  $M^+$

222 ions in the simulation system led to a significant decrease of the  $P^A$ - $P^G$  distances (Fig. 3, 4, Table 1).  
223 Among the studied cations,  $K^+$  ions allowed for the longest  $P^A$ - $P^G$  distances. The  $P^B$ - $O^{3B}$ - $P^G$  angles  
224 in the  $\beta\gamma$ -coordinated Mg-ATP complexes did not differ significantly between simulations with  
225 different cations or without cations added (Fig. 3, 4, Table 1).

226

227

### 228 *Shape of the phosphate chain in the structures of P-loop NTPases*

229 Binding in the catalytic site of a P-loop NTPase imposes constraints on the Mg-NTP complex, so  
230 that only particular conformations of the phosphate chain are allowed. These conformations appear  
231 to be catalytically prone, since NTP binding to an inactive P-loop domain (in the absence of a  
232 specific activating protein) already increases the rate constant of hydrolysis by several orders of  
233 magnitude as compared to NTP hydrolysis in water (74, 75).

234 We analyzed the shapes of phosphate chains and the positions of positive charges around them in the  
235 available crystal structures of P-loop NTPases and compared them with the topology of Mg-ATP  
236 complexes seen in our MD simulations. The InterPro (76) entry for “P-loop containing nucleoside  
237 triphosphate hydrolase” (IPR027417) listed 2,899 X-ray and 55 solution NMR structures of P-loop  
238 proteins. From this list, we selected those X-ray structures that contain Mg<sup>2+</sup> ion and an NTP-like  
239 molecule located in the proximity of at least one Lys residue, which would indicate that this NTP-  
240 like molecule is bound in the active site. Using these criteria, we identified 671 Protein Data Bank  
241 (PDB) entries, many of them with multiple subunits, resulting in the total of 1,357 Mg<sup>2+</sup>-NTP-like  
242 complexes. Crystal structures with non-hydrolyzable NTP analogs were used to gather information  
243 on the shape of the phosphate chain in a potentially catalytically-prone conformation. In structures  
244 with transition state analogs, the AlF<sub>3</sub>/AlF<sub>4</sub><sup>-</sup> moieties mimicked the γ-phosphate group (44, 77, 78).  
245 These structures were used as closest approximations of the nucleotide conformations in the  
246 transition state.

247 To characterize the conformations of the phosphate chain in the active sites of P-loop proteins, we  
248 used the same parameters as for the MD simulation data, namely the P<sup>A</sup>-P<sup>G</sup> distance (or the  
249 corresponding distances in substrate analogs) and the value of the P<sup>B</sup>-O<sup>3B</sup>-P<sup>G</sup> angle (or the

250 corresponding angles in substrate analogs). Using these two parameters as coordinates, we mapped  
251 the conformations attained by NTP-like molecules in the crystal structures (separately shown and  
252 described in Fig. S5) on the heat maps for all four systems, calculated from MD simulations (Fig. 4).  
253 In the top row (Fig. 4A), the heat maps include all conformations of Mg-ATP in water, including  
254 those not found in crystal structures of P-loop NTPases, e.g. with  $\alpha\beta\gamma$  coordination of  $\text{Mg}^{2+}$ , as  
255 shown in Fig. 3. Therefore, conformations of Mg-ATP complexes from MD simulations only  
256 partially overlap with the conformations of non-hydrolyzable analogs of NTPs in P-loop NTPases  
257 (the blue contour in Fig. 4A). The extent of the overlap depends on the nature of the cation used in  
258 MD simulations: it is highest with  $\text{K}^+$  and lowest with  $\text{Na}^+$ . The extent of this overlap was less when  
259 the data from MD simulations were compared to the conformations of transition state analogs (the  
260 pink contour in Fig. 4A). Still, in the presence of  $\text{K}^+$  ions, the occurrence of such transition state-like  
261 conformations was notably higher, while in simulations with  $\text{Na}^+$  such conformations were  
262 completely absent.

263 In the bottom row (Fig. 4B), we compared the conformations of the ATP phosphate chain with the  
264  $\beta\gamma$ -coordinated  $\text{Mg}^{2+}$  ion, as obtained in the series of short (20 ns) MD simulations (Table S3) with  
265 the shapes of phosphate chains in the crystal structures of P-loop NTPases. As seen on the heat  
266 maps, in the absence of any  $\text{M}^+$ , the phosphate chain was remarkably elongated, displaying large  $\text{P}^{\text{A}}$ -  
267  $\text{P}^{\text{G}}$  distances that were not observed either in simulations with added cations or in crystal structures.  
268 The presence of  $\text{M}^+$  ions led to the shortening of the  $\text{P}^{\text{A}}$ - $\text{P}^{\text{G}}$  distances. In the simulations with  $\text{Na}^+$   
269 ions, the ATP phosphate chain was more contracted than in the crystal structures of P-loop NTPases  
270 (Fig. 4B). In contrast, in the MD simulations with  $\text{K}^+$  and  $\text{NH}_4^+$  ions, the phosphate chain shape  
271 matched almost exactly the conformations of the NTP analogs in the structures of P-loop NTPases.  
272 In MD simulations in the presence of  $\text{K}^+$  and  $\text{NH}_4^+$  ions, the distribution of the conformations of  
273 Mg-ATP complex spreads over the areas of non-hydrolyzable NTP analogs and covers even

274 transition state analogs (Fig. 4B). Only the conformations of the transition state analogs with  
275 severely widened ( $>135^\circ$ )  $P^B-O^{3B}-P^G$  angle were not matched by the MD-derived conformations.  
276 Altogether, Fig. 4 shows that the conformational space of phosphate chain conformations, as seen in  
277 P-loop NTPases, overlapped much better with conformations seen in the MD simulations of Mg-  
278 ATP with  $K^+$  and  $NH_4^+$  ions than with conformations obtained with  $Na^+$  ions.

279

### 280 *Cations in the active sites of P-loop NTPases*

281 To further analyze the roles of  $M^+$  ions in P-loop NTPases, we selected 10 crystal structures of P-  
282 loop GTPases and ATPases (2), representing different families of P-loop proteins. We have chosen  
283 mainly the structures with non-hydrolyzable NTP analogs and transition state analogs in complex  
284 with  $Mg^{2+}$  ions, as these structures provide positions of all three phosphate groups. These structures  
285 were superposed by matching the coordinates of the P-loop regions against the structure of the  $K^+$ -  
286 dependent GTPase MnmE [PDB: 2GJ8] (15), see Fig. 5. Each structure was then inspected to  
287 determine the locations of the positively charged residues around the phosphate chain. Fig. 5 shows  
288 that the binding sites for  $M^+$  ions observed in the MD simulations (Fig. 5A) were exactly those  
289 occupied by positively charged groups in the structures of P-loop NTPases (Fig. 5B, C). The binding  
290 site between the  $\beta$ - and  $\gamma$ -phosphates (the BG site) is always occupied by the amino group of the  
291 conserved P-loop lysine residue, whereas the binding site between the  $\alpha$ - and  $\gamma$ -phosphates (the AG  
292 site) could be occupied, in the crystal structures, by either a  $K^+$  or  $Na^+$  ion (Fig. 5B), or an amino  
293 group of an activating lysine residue, or the guanidinium group of arginine (Fig. 5C), or a water  
294 molecule (see below).

295 In all P-loop NTPases, the phosphate chain is seen in the extended conformation similar to that  
296 observed in the presence  $K^+$  and  $NH_4^+$  but not  $Na^+$  ions (Fig. 4B). Such an extended conformation is

297 known to be stabilized by numerous interactions of all three phosphate groups with the residues of  
298 the P-loop motif, see (40) and (Shalaeva et al. submitted).

299 Table 2 summarizes the activation mechanisms for those classes of P-loop NTPases that contain  
300 both  $M^+$ -activated and Arg/Lys-activated enzymes. Across different families of P-loop NTPases,  
301 different activation mechanisms have been described, usually involving interactions with other  
302 proteins, domains of the same protein, or RNA molecules, and resulting in the insertion of a positive  
303 charge - a monovalent cation or an Arg/Lys finger - into the catalytic site (13, 15-17, 24, 60, 79-81).  
304 The catalytic roles of Arg/Lys residues in the AG sites of various classes of P-loop NTPases is  
305 discussed elsewhere (Shalaeva et al. submitted). Here, we focus on the structures of P-loop NTPases  
306 that are dependent upon  $M^+$  ions.

307 We have manually inspected the available structures of known  $K^+$ -dependent P-loop NTPases  
308 (Table S1), checked for  $M^+$  ions bound near the NTP phosphate chain, and compared the structures  
309 of  $K^+$ - and  $Na^+$ -bound NTP analogs in crystal structures of P-loop proteins with the structures of the  
310  $Mg^{2+}$ -ATP- $2K^+$  and  $Mg^{2+}$ -ATP- $2Na^+$  complexes obtained from MD simulations. In total, we were  
311 able to identify and analyze 17 structures of cation-dependent P-loop NTPases in complex with NTP  
312 analogs and  $K^+$ ,  $Na^+$ , or  $NH_4^+$  ions bound in the active site (Table 3). For each such structure, we  
313 checked the shape of the phosphate chain and the coordination sphere of the cation in the AG site.  
314 In all these structures, the distances between  $P^A$  and  $P^G$  atoms (or between the corresponding  
315 mimicking atoms) were in the range of 4.9-5.3 Å for the non-hydrolyzable analogs and 5.3-5.6 Å for  
316 the transition state analogs (Table 3). These values are similar to the  $P^A$ - $P^G$  distances observed in  
317 MD simulations of the Mg-ATP complex in the presence of  $K^+$  ions (Fig. 3, 4 and Table 1).

318 The majority of  $K^+$ -activated NTPases, as well as the unique family of the  $Na^+$ -adapted dynamin-  
319 related GTPases, belong to the TRAFAC class of P-loop NTPases (2), where the binding of the  $M^+$

320 ion is assisted by the so-called K-loop (20). This loop goes over the nucleotide binding site and  
321 provides two backbone carbonyl groups as additional ligands to the  $M^+$  coordination sphere (purple  
322 cartoon and sticks in Fig. 1B,C). To our surprise, very few structures of  $K^+$ -dependent GTPases of  
323 the TRAFAC class contained  $K^+$  ions in their AG sites (*cf* Table S1 and Table 3). Furthermore, in  
324 most cases, the  $K^+$  loops were either unresolved or distorted (Fig. S6). Separate crystal structures  
325 with and without activating  $K^+$  ion were available only for the tRNA modification GTPase MnmE  
326 see Table 3 and Fig. S7. It is believed that during the catalytic turnover, two MnmE proteins  
327 undergo conformational changes to allow dimerization of their GTPase domains (G-domains)  
328 resulting in their mutual activation (16, 17). We have compared the two structures of the MnmE  
329 GTPase to further clarify their  $K^+$ -binding determinants. In the crystallized full-length MnmE dimer,  
330 only the N-terminal domains of the two proteins interact, forming a central hinge, whereas the large  
331 helical domains and the P-loop GTPase domains (G-domains) are located on the opposite sides from  
332 the central hinge (PDB: 3GEI, Fig. S7). In such an arrangement, the distance between the active  
333 sites of the G-domains (with non-hydrolyzable GTP analogs bound) is about 20 Å (15, 16). The K-  
334 loops, responsible for cation binding, are not resolved and no  $K^+$  binding is observed. In the crystal  
335 structures of the isolated G-domains of MnmE in complex with the transition state analog GDP-  
336  $AlF_4^-$ , which are dimerized via their K-loop (Switch I) regions (as defined in Fig. 1), the K-loops and  
337  $M^+$  cations are resolved (PDB: 2GJ8, Fig. S7). The disordered K-loop in the inactive state of MnmE  
338 and the stabilized K-loop in the active state of the protein indicate that the activity of the enzyme  
339 could be controlled via formation of a full-fledged  $K^+$ -binding site upon dimerization.

340 Human dynamin and the dynamin-like protein from *A. thaliana*, as noted above, are equally well  
341 activated by  $Na^+$  and  $K^+$  ions (48, 49). Dynamin-like proteins are activated upon dimerization, and  
342 crystal structures of the dimers of these GTPases in complex with GTP analogs and  $Na^+$  ions are  
343 available (Table 3, Fig. 1C, Fig. 6). These structures contain fully resolved K-loops, which allowed



344 us to compare the structures of  $K^+$ -dependent and  $Na^+$ -adapted P-loop NTPases with the results of  
345 our MD simulations. In MD simulations, presence of  $Na^+$  ions led to contracted phosphate chain  
346 conformations (Fig. 3, 6A), whereas crystal structures of dynamins showed extended conformations  
347 of the phosphate chain even with a  $Na^+$  ion bound (Fig. 6B). In dynamin-like proteins, as in other P-  
348 loop NTPases, the phosphate chain is in the catalytically prone extended conformation owing to its  
349 stabilization by the residues of the P-loop, so that the  $Na^+$  ion interacts with the  $\gamma$ -phosphate but  
350 cannot reach the oxygen atom of the  $\alpha$ -phosphate (Table 3, Fig. 6B). The ability of dynamins to  
351 keep the  $Na^+$  ion in the AG position appears to be due to the changes in the K-loop and its  
352 shortening as a result of several mutations (20), *cf* Fig. 1C and 1D. The truncated K-loop can come  
353 closer to the smaller  $Na^+$  ion and stabilize it in the AG position by backbone carbonyl oxygens (Fig.  
354 6B). The non-bridging oxygen atom of  $\alpha$ -phosphate forms an alternative hydrogen bond with the  
355 backbone amide group of Gly60 of the truncated K-loop (Fig. 6B). The truncated K-loop appears to  
356 be flexible enough to accommodate either  $K^+$  or  $Na^+$  ions, allowing dynamins to be equally well  
357 activated by  $K^+$  and  $Na^+$  ions (48, 49).

358 Outside of the TRAFAC class, only a few cases of  $K^+$ -dependent P-loop NTPases are known, all  
359 among RecA-like recombinases (Tables 2, 3 and S1). Along with rotary ATPases, these proteins are  
360 attributed to the  $F_1$ -RecA-like class of the ASCE (Additional Strand, Catalytic E) division, as they  
361 bear an additional strand between the Walker A and Walker B motifs and have a conserved Glu  
362 residue in the catalytic site (2). Consequently, RecA-like recombinases are dramatically different  
363 from the TRAFAC class proteins and lack such characteristic structural motifs as Switch I/K-loop  
364 and Switch II. Crystal structure of the  $K^+$ -dependent recombinase RadA [PDB: 3EW9] (82) shows  
365 two binding sites for  $K^+$  ions (Fig. S8). One of these binding sites corresponds roughly to the AG  
366 site, although the cation is shifted towards  $\gamma$ -phosphate and away from  $\alpha$ -phosphate (as in the case of  
367 dynamins). The second cation is bound between  $\gamma$ -phosphate and the catalytic Glu residue, in the

368 position that corresponds to the low-occupancy G-site observed in our MD simulations in water  
369 (Fig. 2A).

## 370 **Discussion**

### 371 *Activation of P-loop NTPases by monovalent cations*

372 The hydrolysis of NTPs is a key reaction in biochemistry. The high free energy of the hydrolysis is  
373 due to the repulsion between the negatively charged phosphate groups. At the same time, the  
374 cumulative negative charge of these groups repels the attacking nucleophilic groups (usually the  
375 OH<sup>-</sup> ions), securing the stability of the molecule in the absence of NTP-binding enzymes (41, 83).  
376 The current views on the mechanisms of NTP hydrolysis (41, 44, 51-53, 70, 83) posit that the  
377 electrophilic  $\gamma$ -phosphate group is attacked by a hydroxyl group, derived from a pre-polarized water  
378 molecule. To facilitate access of the negatively charged hydroxyl to the phosphate chain, several  
379 positive charges are needed to compensate the four negative charges of the phosphate groups and,  
380 additionally, the transient negative charge of the leaving NDP group, see (41, 70) for reviews.  
381 Catalysis by known NTPases utilizes at least four positive charges: either two divalent cations (as in  
382 DNA and RNA polymerases and many nucleases and transposases (71, 84)) or a divalent cation  
383 (usually Mg<sup>2+</sup>) and two single positive charges in the form of (i) the conserved Lys residue and (ii)  
384 the activating M<sup>+</sup> ions or Lys/Arg residues, as in P-loop NTPases. Further electrostatic  
385 compensation appears to be provided by the amide groups of the protein backbone (40), which bind  
386 and stabilize the phosphate chain in the extended conformation (Fig. 5).

387 The stabilization of an NTP molecule at the P-loop in an extended conformation dramatically  
388 increases the rate of hydrolysis even in the absence of an activating moiety. In Ras-like GTPases,  
389 binding of GTP to the P-loop accelerates the rate of hydrolysis by five orders of magnitude (74, 75).  
390 Delbaere and coauthors noted that, in a bound NTP molecule, the  $\beta$ - and  $\gamma$ -phosphates are in an

391 eclipsed state owing to the interaction with the  $Mg^{2+}$  ion and conserved Lys residue of the P-loop. In  
392 this state,  $\beta$ - and  $\gamma$ -phosphates repel each other, which could explain the higher hydrolysis rate (85,  
393 86). Hence, P-loop-bound conformations of the phosphate chains (Fig. 5) are catalytically prone.

394 Here, we showed that monovalent cations occupy specific well-defined sites (AG and BG sites, Fig.  
395 2A) in the vicinity of the triphosphate chain even in the absence of enzymes. Fig. S3 shows that  
396 binding of the second  $K^+$  ion in the AG site can bring the phosphate chain into the fully eclipsed  
397 conformation, which has been previously suggested to be particularly catalytically productive (43).  
398 These data could explain why larger ions, such as  $K^+$  and  $Rb^+$ , were shown to be more efficient than  
399 the smaller  $Na^+$  and  $Li^+$  ions in accelerating transphosphorylation even in the absence of enzymes  
400 (50), see Table S2.

401 The AG and BG sites are occupied by positively charged moieties in the crystal structures of P-loop  
402 NTPases (Fig. 5). The binding site between the  $\beta$  and  $\gamma$  phosphates (the BG site) is always occupied  
403 by the  $NH_3^+$  group of the highly conserved P-loop lysine residue. The AG sites are usually taken by  
404 either by positively charged groups of arginine or lysine residues (Fig. 1A, 5C) or by  $M^+$  ions (Fig.  
405 1B, 1C, 5B), which serve as cofactors of NTP hydrolysis (15-17, 20).

406 In available structures of P-loop NTPases of different classes, the phosphate chains are in the same  
407 extended conformation (Fig. 4, 5), which is maintained by the interactions with the side chains and  
408 backbone atoms of the P-loop motif, independently of the presence of monovalent activating  
409 moieties in the AG site. Thus, the P-loop keeps the phosphate chain in an extended, catalytically  
410 prone conformation, which counteracts the contracting effect of monovalent cations. In the P-loop-  
411 bound, stretched NTP molecule, a large cation, such as Arg/Lys amino group or a  $K^+$  ion (when  
412 stabilized by a K-loop) can coordinate both the  $O^{2A}$  and  $O^{3G}$  atoms (see Fig. 5B, S3). The smaller  
413  $Na^+$ -ion can neither reach both  $O^{2A}$  and  $O^{3G}$  atoms of the extended phosphate chain (Fig. 1C, 7), nor

414 contract the phosphate chain that is fixed by the P-loop, which explains why Na<sup>+</sup> ions are not  
415 competent in most P-loop NTPases.

416 The affinity of the AG site to K<sup>+</sup> ion is intrinsically low (Table S2, Fig. 2C), therefore binding of K<sup>+</sup>  
417 ions to this site in M<sup>+</sup>-dependent P-loop NTPases of the TRAFAC class requires a full-fledged K-  
418 loop, an extended version of the Switch I region, which provides additional ligands for the cation,  
419 see Fig. 1B, 6B and (20).

420 In the case of dynamins, the ability to bind either a Na<sup>+</sup> ion or a K<sup>+</sup> ion in the AG site was earlier  
421 traced to several mutations (20). Specifically, in dynamins, (i) the conserved Asn in the P-loop is  
422 replaced by a shorter Ser residue; (ii) the K-loop is shortened by one residue, and (iii) the Asn  
423 residue responsible for the K-loop conformation is replaced by the longer Glu residue. These  
424 mutations allow the K-loop to come closer to the small Na<sup>+</sup> ion and stabilize it in the AG site even in  
425 the absence of a bond between the Na<sup>+</sup> ion and O<sup>2A</sup> atom (Fig. 1C, 6B). In dynamins, the free O<sup>2A</sup>  
426 atom is coordinated by the backbone amide group of the shortened K-loop residue (Gly60 in the  
427 human dynamin PDB 2X2E (48)). This interaction is not seen in the structures of K<sup>+</sup>-dependent  
428 GTPases (*cf.* Fig. 1B with Fig. 1C). It seems that the additional coordination of O<sup>2A</sup> by the Gly  
429 residue of the shortened K-loop serves as a functional replacement of its coordination by the K<sup>+</sup> ion.

430 The observed absence of K<sup>+</sup> ions from most structures of K<sup>+</sup>-dependent P-loop NTPases (Fig. S6)  
431 could be due to several reasons, including their absence from the crystallization medium. For  
432 example, in one of the structures of the K<sup>+</sup>-dependent GTPase Era, which was crystallized in the  
433 absence of K<sup>+</sup> ions (PDB: 3R9W, (87)), the potential K<sup>+</sup> binding site contains a water molecule (id  
434 624) that is 2.9-3.4 Å away from six potential K<sup>+</sup> ion ligands. Owing to the presence of a full-  
435 fledged K<sup>+</sup>-binding site, we included this structure in Table 3 (see also Fig. S9). Even when K<sup>+</sup> ions  
436 were present in the crystallization medium, the electron density difference between the K<sup>+</sup> ion (18

437 electrons) and the water molecule (10 electrons) is often insufficient to easily distinguish their  
438 relative contributions to the diffraction pattern (37). Thus, at 60% occupancy, the  $K^+$  ion cannot be  
439 distinguished from a water molecule (88). However, in most crystal structures of  $K^+$ -dependent  
440 GTPases (Table S1), not only the  $M^+$  ion is absent, but the entire K-loop is either unresolved or  
441 shows up far away from the active site (Fig. S6). In the structures with an undefined position of the  
442 K-loop, the  $M^+$ -binding site is incomplete, although all the sequence features of an  $M^+$ -dependent  
443 protein, as defined by Ash et al (20), are present. Thus, other factors appear to additionally affect the  
444  $K^+$  binding.

445 One of such factors could be inferred from the comparison of crystal structures of the cation-  
446 dependent GTPases MnmE and Era in their active and inactive conformations. A full-fledged cation  
447 binding site was absent from the inactive conformations of MnmE (Fig. S6) and Era (Fig. S9), but  
448 present in the structures where they were crystallized together with their physiological activating  
449 partners. Notably, dimerization of the G-domains of MnmE required both the GTP nucleotide and  
450  $K^+$  ions in the medium, whereas  $Na^+$  ions could not support dimerization, even in the presence of  
451 GTP (16, 17). In the complex of Era with its activator, a 16S rRNA fragment (PDB: 3R9W),  $K^+$  ions  
452 were missing because of their absence from the crystallization solution. Still, the K-loop attained the  
453 shape required for cation binding and the cation-binding site was complete, with all the coordination  
454 bond partners at short distances ( $<3.5\text{\AA}$ ) from the water molecule that occupied the place of the  $K^+$   
455 ion (Fig. S9).

456 The disordered K-loop in the inactive state of MnmE and Era and the stabilized K-loop in their  
457 active states suggest that the interaction with the activating partner stabilizes the functional,  $K^+$ -  
458 binding conformation of the K-loop, which enables binding of the  $K^+$  ion and its subsequent  
459 interaction with the NTP molecule. Indeed, proper conformation of the K-loop (Switch I region) is  
460 crucial for the cation binding, since this loop provides two backbone oxygen atoms as ligands for the

461 cation. We believe that the same mechanism could be involved in the activation of other  $K^+$ -  
462 dependent NTPases (Table 2), whereby the proper conformation of the K-loop and functionally  
463 relevant  $K^+$  binding could be promoted by interaction with the activating protein or RNA.  
464 In RecA-like recombinases (Fig. S8), the  $K^+$  ion in the AG site is coordinated by a conserved Asp  
465 residue, which is responsible for the  $K^+$ -dependent activation (89). This residue (Asp302 in PDB:  
466 2F1H) is provided by the adjacent monomer within the RadA homooligomer that assembles upon  
467 interaction of RecA proteins with double-stranded DNA. Thus, in RecA-like recombinases, the  $K^+$ -  
468 binding sites differ from those in  $K^+$  (or  $Na^+$ )-dependent TRAFAC NTPases, but, similarly to  
469 TRAFAC NTPases, appear to attain functionality upon the interaction with the activating partner  
470 that provides ligands for the  $K^+$  ion.

471 In conclusion, in P-loop NTPases, the activating amino groups of Arg/Lys residues or  $K^+$  ions  
472 occupy the AG sites similarly to the  $K^+$  and  $NH_4^+$  ions seen in MD simulations of Mg-ATP in water.  
473 In addition, the very formation of the  $M^{+}$ -binding site next to the P-loop appears to require  
474 additional interactions of the P-loop-containing domain with activating domains or proteins, as seen  
475 in MnmE and RecA, or RNA, as seen in Era (Fig. S6-S9).

### 476 *Evolutionary implications*

477 The major classes of P-loop NTPases appear to have emerged before the divergence of bacteria and  
478 archaea (2, 4-10, 90-92). An evolutionary scenario for the origin of P-loop NTPases has been  
479 recently proposed by Lupas and colleagues, who hypothesized that the ancestor of P-loop NTPases  
480 was an NTP-binding protein incapable of fast NTP hydrolysis, but, perhaps, involved in the  
481 transport of nucleotides (4). Indeed, as already discussed (2), the main common feature of the P-loop  
482 NTPases is the eponymous motif, which was identified as an antecedent domain segment by Lupas  
483 and colleagues (5). Milner-White and coworkers argued that the very first catalytic motifs could

484 have been short glycine-rich sequences capable of stabilizing anions (nests) (93, 94) or cations  
485 (niches) (95); such motifs can still be identified in many proteins. Specifically, the P-loop was  
486 identified as a nest for the phosphate group(s) (93, 96). We showed here that the P-loop motif  
487 specifically binds nucleotides in the same extended, catalytically-prone conformation in different  
488 families of P-loop NTPases (Fig. 4-6, S5).

489 The conformational space of the Mg-ATP complex, as sampled by our MD simulations (Fig. 3,4),  
490 reflects the preferred phosphate chain conformations in water and in the presence of monovalent  
491 cations.  $K^+$  and  $NH_4^+$  ions brought Mg-ATP into extended conformations that were most similar to  
492 the catalytically-prone conformations observed in the active sites of P-loop NTPases. It is tempting  
493 to speculate that the P-loop could have been shaped in  $K^+$ - and/or  $NH_4^+$ -rich, but  $Na^+$ -poor  
494 environments, which would favor the extended conformations of unbound (free) NTPs. Indeed, the  
495 smallest ion in this study -  $Na^+$  - is known to exhibit the strongest binding to the phosphate chain,  
496 which has been reproduced in our MD simulations (Table S2, Fig. S2). Consequently, tightly bound  
497  $Na^+$  ions would keep the phosphate chain in a contracted/curled conformation in water (Fig. 3, 4).  
498  $K^+$  and  $NH_4^+$  ions are larger, which results in the wider  $P^B-O^{3B}-P^G$  angles and longer  $P^A-P^G$  distances  
499 (Table 1, Fig. 3, 4). However, binding of  $K^+$  and  $NH_4^+$  ions to the phosphate chain is much weaker  
500 than binding of  $Na^+$  (Fig. 2C-E, Table S2). Thus, stretched conformation of the phosphate chain in  
501 water could be reached in the presence of  $K^+$  and/or  $NH_4^+$  ions only if their concentrations were  
502 distinctly higher than those of  $Na^+$  ions.

503 When an NTP molecule is bound to a P-loop NTPase, the catalytically-prone extended conformation  
504 of its phosphate chain is fully determined by the interactions with the residues of the P-loop itself.  
505 An extended phosphate chain could bind (activating)  $K^+/NH_4^+$  ions or amino groups of Lys/Arg in  
506 its AG site, but is too stretched to bind  $Na^+$  ions. As argued by Lupas and colleagues, one of the  
507 possible mechanisms for the emergence of diverse classes of P-loop NTPases could be a

508 combination of the same “original” NTP-binding P-loop domain with different partners that could  
509 promote the insertion of an activating moiety into the active site (4). This suggests that  $K^+$  ions  
510 and/or amino groups were available as activating cofactors during the emergence of P-loop  
511 NTPases. Hence, the P-loop motif itself may have been shaped by the high levels of  $K^+$  and/or  $NH_4^+$   
512 ions in the habitats of the first cells. Since the emergence of the P-loop motif happened at the very  
513 beginning of life, when the ion-tight membranes were unlikely to be present, the match between the  
514 shape of the P-loop and large cations of  $K^+$  and  $NH_4^+$  is consistent with our earlier suggestions on  
515 the emergence of life in terrestrial environments rich in  $K^+$  and nitrogenous compounds (38, 39).

516 The activating Arg/Lys residues are usually provided upon interactions of the P-loop with another  
517 domain of the same protein, or an adjacent monomer in a dimer or an oligomer, or a specific  
518 activating protein, or DNA/RNA (Table 2), so that this activation can be tightly controlled, see also  
519 (Shalaeva et al. submitted). For cation-dependent TRAFAC NTPases, however, the situation is  
520 different: the cation-binding K-loop is an extended Switch I region of the same P-loop domain (Fig.  
521 1B, 1C, 5B, 6B). If the formation of the K-loop and binding of an  $M^+$  ion to it were able to proceed  
522 in an uncontrolled way, then the cell stock of ATP/GTP would be promptly hydrolyzed by  
523 constantly activated  $M^+$ -dependent NTPases. This, however, does not happen;  $M^+$ -dependent  
524 NTPases are almost inactive *in solo* and attain the ability to hydrolyze NTPs only after binding to an  
525 activating partner. This behavior is in line with our MD simulations that indicate rather poor binding  
526 of  $K^+$  ions to the “naked” AG site of the ATP molecule (Fig. 2C, S1 - S4). This poor  $K^+$  binding  
527 manifests itself also in the need to use very high ( $\gg 100$  mM) levels of potassium salts to activate  
528 the  $K^+$ -dependent P-loop NTPases in the absence of their physiological activating proteins or RNA  
529 (33, 37). As our comparative structure analysis showed, the functional K-loop in such NTPases is  
530 distorted in the inactive (apo-) state (Fig. S6), but attains its functional shape and eventually binds  
531 the cation upon the interaction with the activating partner (Fig. S7-S9). The interaction with the



532 activator, however, must be highly specific to prevent the activation of hydrolysis in response to an  
533 occasional binding to a non-physiological partner. It indeed seems to be specific; Table 3 lists  
534 structures of the eukaryotic translation initiation factor eIF5B in which a kind of a K-loop formed  
535 not via their functional interaction with the ribosome, but through non-physiological crystal-packing  
536 contacts (37). Although these quasi-K-loops bind different monovalent cations, the corresponding  
537 structures contain GTP molecules, indicating the absence of hydrolytic activity. In addition, the  
538 respective P<sup>A</sup>-P<sup>G</sup> distances are shorter than those in the structures of P-loop NTPases in their active  
539 conformations (Table 3). Apparently, in addition to cation binding, some other factors may control  
540 the catalysis and prevent spurious NTP hydrolysis. Some of these factors are discussed in (Shalaeva  
541 et al., submitted).

542 In spite of the long evolution of P-loop-NTPases, only in a single known case, in eukaryotic  
543 dynamins, the enzyme can be activated both by K<sup>+</sup> and Na<sup>+</sup> ions (20, 48, 49). The adaptation to Na<sup>+</sup>  
544 ions required at least 3 mutational changes in the highly conserved parts of the protein, see (20) and  
545 Fig. 6. The low probability of this combination of changes may explain why just this one case of  
546 Na<sup>+</sup>-adaptation is known. In contrast, Arg/Lys residues are widespread as activators of P-loop  
547 NTPases, see Table 2 and Shalaeva et al., submitted). In a few cases (e.g. in TRAFAC class  
548 NTPases) it was possible to trace how Arg residues replaced K<sup>+</sup> ions in the course of evolution in  
549 different lineages (38, 39). The recruitment of an Arg/Lys residue as an activating moiety is  
550 relatively simple and makes the catalysis independent of the oscillations of K<sup>+</sup> and Na<sup>+</sup> levels in the  
551 cell.

### 552 ***Relation to NTPases with other folds***

553 Our MD simulations of the behavior of an unconstrained Mg-ATP complex in water showed  
554 correlations between binding of cations to the ATP molecules and their conformation. Our data

555 provide information not only on the interaction of  $M^+$  ions with Mg-ATP complexes in the bidentate  
556  $\beta\gamma$  coordination of the  $Mg^{2+}$  ion, which is typical for the P-loop NTPases, but also on their  
557 interaction with tridentate  $\alpha\beta\gamma$ -coordinated Mg-ATP complexes (Fig. 3, 4A, S4, Table 1).

558 The tridentate  $\alpha\beta\gamma$ -coordination is found, for instance, in  $K^+$ -dependent chaperonin GroEL and  
559 related proteins. Unlike P-loop NTPases, the GroEL from *E. coli* and the related chaperonin Mm-  
560 cpn from *Methanococcus maripaludis* were inhibited by  $Na^+$  ions even when  $Na^+$  was added over  $K^+$   
561 (97). In the crystal structures of GroEL,  $K^+$  ion was identified in the position that corresponded to  
562 the AG site of our MD simulations, cf the right structure in Fig. 3B with PDB: 1PQC (72) or PDB:  
563 1KP8 (73). The  $P^A$ - $P^G$  distance for the ATP analogs is 4.4 Å in the former and 4.3 Å in the latter  
564 structure. These distances are similar to the one obtained in the MD simulations for the tridentate  
565  $\alpha\beta\gamma$ -coordinated Mg-ATP complexes in the presence of  $K^+$  ions ( $4.32 \pm 0.24$  Å); in the presence of  
566  $Na^+$  ions the distance was shorter,  $4.26 \pm 0.37$  Å (Table 1). The available structures of Mm-cpn  
567 (PDB: 3RUV and 3RUW (98)) contain only a water molecule in the AG position of the bound  
568 nucleotide; this water molecule, however, is surrounded by 5 oxygen atoms at  $<3$  Å distance,  
569 indicating the presence of a typical cation-binding site.

570 For GroEL,  $K^+$  ion was shown to increase the affinity to the nucleotide (99). It appears that the  
571 phosphate chain, unlike those tightly bound to the P-loops, retains certain flexibility in GroEL-type  
572 ATPases, so that its shape depends on the size of the monovalent cation, as it was observed in our  
573 MD simulations. Here, binding of the  $Na^+$  ion would lead to a contracted, supposedly, less  
574 catalytically prone conformation. Thus,  $Na^+$  ions added over  $K^+$  ions, owing to their ability to bind  
575 more tightly, would inhibit ATP hydrolysis in line with experimental observations (97). The  
576 example of GroEL-type ATPases shows that the balance between compensating the negative charge  
577 of the triphosphate chain and maintaining its catalytically-prone conformation might be important

578 not only for P-loop NTPases, but also for other NTPase superfamilies. Accordingly, our MD  
579 simulation data may help clarify the mechanisms in other NTPases.

## 580 **Methods**

### 581 *MD simulations*

582 To investigate the effects of cation binding on the structure of the Mg-ATP complex, we have  
583 conducted free MD simulations of Mg-ATP complex in water solution alone and in the presence of  
584  $K^+$ ,  $Na^+$ , or  $NH_4^+$  ions. Together with monovalent cations,  $Cl^-$  ions were added to balance the total  
585 charge of the system. For the simulation of Mg-ATP complex in water solution without additional  
586 ions, two positive charges had to be added to balance the total charge of the system. We added two  
587 dummy atoms with single positive charges and applied positional restraints to fix the positions of  
588 these atoms in the corners of the unit cell. In all systems, the ATP position was restrained to the  
589 center of the cell by applying harmonical positional restraints to the  $N_1$  atom of the adenine ring.

590 For simulations, we used CGenFF v.2b8 parameters for  $ATP^{4-}$  and  $NH_4^+$  molecules, an extension of  
591 the CHARMM force field designed for small molecules (66). We used the TIP3P water model,  
592 which differs from other classical models in the presence of additional van der Waals parameters for  
593 interactions between water molecules (100). For the  $Mg^{2+}$  ion, we used parameters designed by  
594 Callahan et al. (101). For  $Na^+$  and  $K^+$  ions, we used parameters of Joung and Cheatham (102).

595 Non-bonded interactions were computed using particle mesh Ewald method with 10 Å real space  
596 cutoff for electrostatic interactions and the switching functions between 10 and 12 Å for the van der  
597 Waals interactions. The multiple time-step method was employed for the electrostatic forces; the  
598 non-bonded interaction list was constructed using a cutoff of 14 Å and updated every 20 steps. The  
599 covalent bonds involving hydrogen atoms were constrained using the SHAKE algorithm (103) (the

600 MD integration step, 1 fs). Then the water box and ions were added; after the addition of Na<sup>+</sup> or K<sup>+</sup>  
601 and neutralizing ions the total ionic strength was 0.2 M.

602 Molecular dynamics simulations were performed in the *NPT* ensemble. Temperature was maintained  
603 at  $T= 298$  K with the Berendsen thermostat using a coupling parameter of  $5 \text{ ps}^{-1}$ (104). The pressure  
604 was maintained at 1 atm by the Langevin piston method with the piston mass of 100 amu and  
605 Langevin collision frequency of  $500 \text{ ps}^{-1}$ (105).

606 After an initial 20-ns equilibration, free MD simulations were conducted for 170 ns in three  
607 independent runs (500 ns total) for each of the four systems (K<sup>+</sup>, Na<sup>+</sup>, NH<sub>4</sub><sup>+</sup> and no extra ions). In  
608 our calculations, we used Gromacs v.4.5.5 (106) software with MPI implementation at the  
609 supercomputer SKIF “Chebyshev” at the Computational Center, Moscow State University.

610 VMD (107) was used for visualization of the Mg-ATP complex conformation during the  
611 simulations. For statistical analysis of MD trajectories, we wrote a set of MatLab(108) scripts to  
612 calculate the geometrical properties of the Mg-ATP complex and to evaluate the radial distribution  
613 functions and dissociation constants of the cations bound to it.

#### 614 ***Protein structure analysis***

615 For statistical analysis of the PDB structures, we used the InterPro database (76). A list of PDB IDs  
616 of P-loop proteins was extracted for the InterPro entry IPR027417 and filtered with the RCSB PDB  
617 search engine (109) to include only those structures that contained Mg<sup>2+</sup> ion and one of the  
618 following molecules (in RCSB PDB chemical IDs): ATP, GTP, ANP, GNP, ACP, GCP, ASP, GSP,  
619 ADP, and GDP. We used custom MatLab scripts to measure the distances from the NTPs (or their  
620 analogs) to the surrounding Lys/Arg residues and selected only those structures with the nucleotide  
621 bound to at least one Lys (indicating that the nucleotide is indeed bound to the P-loop and the P-loop

622 Lys residue is not mutated). Custom MatLab scripts were also used to measure the shape of the  
623 phosphate chain in each NTP-like substrate or the transition state-mimicking molecule.

624 To characterize  $M^{+}$ -binding sites of P-loop proteins, we have searched the available literature data  
625 for cation-dependent activities of the respective proteins, with the results summarized in Table S1.  
626 For each of those proteins, we have examined the available crystal structures in order to characterize  
627 the cation binding site(s). In total, we have selected 17 structures with metal cations, ammonium  
628 ions or water molecules (Table 3). Multiple superpositions of the P-loop proteins were built in  
629 PyMOL (110) by matching coordinates of the P-loop motif together with the  $\beta$ -strand and  $\alpha$ -helix  
630 flanking this loop using the PyMOL's "super" function. Each protein was superposed to the  
631 reference structure of the MnmE GTPase structure (PDB: 2GJ8) (15). In addition to cation-  
632 dependent P-loop proteins we have chosen six cation-independent proteins from different families  
633 for comparison (Fig. 6C).

## 634 **Acknowledgments**

635 Very useful discussions with Drs. A.V. Golovin, A. Gorfe, J. Klare, E.V. Koonin, V.P. Skulachev  
636 and H.-J. Steinhoff are greatly appreciated. We are thankful to Dr. D. Dibrova and A.  
637 Mulkidzhanyan for their help during the launching phase of this project. This study was supported  
638 by the Deutsche Forschungsgemeinschaft, Federal Ministry of Education and Research of Germany  
639 (A.Y.M.), the German Academic Exchange Service (D.N.S.), a grant from the Russian Science  
640 Foundation (14-50-00029), and the Lomonosov Moscow State University (Supercomputer Facility,  
641 Development Program). M.Y.G. is supported by the Intramural Research Program of the NIH at the  
642 National Library of Medicine.

643

## 644 References

- 645 1. Koonin EV, Wolf YI, Aravind L. Protein fold recognition using sequence profiles and its  
646 application in structural genomics. *Adv Protein Chem.* 2000;54:245-275. doi: 10.1016/S0065-  
647 3233(00)54008-X.
- 648 2. Leipe DD, Wolf YI, Koonin EV, Aravind L. Classification and evolution of P-loop GTPases and  
649 related ATPases. *J Mol Biol.* 2002;317:41-72. doi: 10.1006/jmbi.2001.5378.
- 650 3. Anantharaman V, Aravind L, Koonin EV. Emergence of diverse biochemical activities in  
651 evolutionarily conserved structural scaffolds of proteins. *Curr Opin Chem Biol.* 2003;7:12-20.  
652 doi: S1367593102000182 [pii].
- 653 4. Alva V, Söding J, Lupas AN. A vocabulary of ancient peptides at the origin of folded proteins.  
654 *Elife.* 2015;4:e09410. doi: 10.7554/eLife.09410.
- 655 5. Lupas AN, Ponting CP, Russell RB. On the evolution of protein folds: are similar motifs in  
656 different protein folds the result of convergence, insertion, or relics of an ancient peptide world?  
657 *J Struct Biol.* 2001;134:191-203. doi: 10.1006/jsbi.2001.4393.
- 658 6. Ponting CP, Russell RR. The natural history of protein domains. *Annu Rev Biophys Biomol*  
659 *Struct.* 2002;31:45-71. doi: 10.1146/annurev.biophys.31.082901.134314.
- 660 7. Söding J, Lupas AN. More than the sum of their parts: on the evolution of proteins from  
661 peptides. *Bioessays.* 2003;25:837-846. doi: 10.1002/bies.10321.
- 662 8. Orengo CA, Thornton JM. Protein families and their evolution—a structural perspective. *Annu*  
663 *Rev Biochem.* 2005;74:867-900. doi: 10.1146/annurev.biochem.74.082803.133029.
- 664 9. Ranea JA, Sillero A, Thornton JM, Orengo CA. Protein superfamily evolution and the last  
665 universal common ancestor (LUCA). *J Mol Evol.* 2006;63:513-525. doi: 10.1007/s00239-005-  
666 0289-7.
- 667 10. Wuichet K, Sogaard-Andersen L. Evolution and diversity of the Ras superfamily of small  
668 GTPases in prokaryotes. *Genome Biol Evol.* 2015;7:57-70. doi: 10.1093/gbe/evu264.
- 669 11. Walker JE, Saraste M, Runswick MJ, Gay NJ. Distantly related sequences in the a- and b-  
670 subunits of ATP synthase, myosin, kinases and other ATP-requiring enzymes and a common  
671 nucleotide binding fold. *EMBO J.* 1982;1:945-951.
- 672 12. Saraste M, Sibbald PR, Wittinghofer A. The P-loop – a common motif in ATP- and GTP-  
673 binding proteins. *Trends Biochem Sci.* 1990;15:430-434.
- 674 13. Bos JL, Rehmann H, Wittinghofer A. GEFs and GAPs: Critical elements in the control of small  
675 G proteins. *Cell.* 2007;129:865-877. doi: 10.1016/j.cell.2007.05.018.
- 676 14. Wu Y, Qian XG, He YJ, Moya IA, Luo Y. Crystal structure of an ATPase-active form of Rad51  
677 homolog from *Methanococcus voltae*. Insights into potassium dependence. *J Biol Chem.*  
678 2005;280:722-728. doi: 10.1074/jbc.M411093200.
- 679 15. Scrima A, Wittinghofer A. Dimerisation-dependent GTPase reaction of MnmE: how potassium  
680 acts as GTPase-activating element. *EMBO J.* 2006;25:2940-2951. doi:  
681 10.1038/sj.emboj.7601171.
- 682 16. Meyer S, Bohme S, Kruger A, Steinhoff H-J, Klare JP, Wittinghofer A. Kissing G domains of  
683 MnmE monitored by X-ray crystallography and pulse electron paramagnetic resonance  
684 spectroscopy. *PLoS Biol.* 2009;7:e1000212.
- 685 17. Bohme S, Meyer S, Kruger A, Steinhoff HJ, Wittinghofer A, Klare JP. Stabilization of G  
686 domain conformations in the tRNA-modifying MnmE-GidA complex observed with double  
687 electron electron resonance spectroscopy. *J Biol Chem.* 2010;285:16991-17000. doi:  
688 10.1074/jbc.M109.096131.
- 689 18. Anand B, Surana P, Prakash B. Deciphering the catalytic machinery in 30S ribosome assembly  
690 GTPase YqeH. *PLoS One.* 2010;5:e9944. doi: 10.1371/journal.pone.0009944.

- 691 19. Verstraeten N, Fauvart M, Versees W, Michiels J. The universally conserved prokaryotic  
692 GTPases. *Microbiol Mol Biol Rev.* 2011;75:507-542. doi: 10.1128/MMBR.00009-11.
- 693 20. Ash M-R, Maher MJ, Guss JM, Jormakka M. The cation-dependent G-proteins: in a class of  
694 their own. *FEBS Lett.* 2012;586:2218-2224.
- 695 21. Yamanaka K, Hwang J, Inouye M. Characterization of GTPase activity of TrmE, a member of a  
696 novel GTPase superfamily, from *Thermotoga maritima*. *J Bacteriol.* 2000;182:7078-7082.
- 697 22. Hwang J, Inouye M. An essential GTPase, Der, containing double GTP-binding domains from  
698 *Escherichia coli* and *Thermotoga maritima*. *J Biol Chem.* 2001;276:31415-31421. doi:  
699 10.1074/jbc.M104455200.
- 700 23. Moreau M, Lee GI, Wang Y, Crane BR, Klessig DF. AtNOS/AtNOA1 is a functional  
701 *Arabidopsis thaliana* cGTPase and not a nitric-oxide synthase. *J Biol Chem.* 2008;283:32957-  
702 32967. doi: 10.1074/jbc.M804838200.
- 703 24. Ash MR, Maher MJ, Guss JM, Jormakka M. The initiation of GTP hydrolysis by the G-domain  
704 of FeoB: insights from a transition-state complex structure. *PLoS One.* 2011;6:e23355. doi:  
705 10.1371/journal.pone.0023355.
- 706 25. Tomar SK, Kumar P, Prakash B. Deciphering the catalytic machinery in a universally conserved  
707 ribosome binding ATPase YchF. *Biochem Biophys Res Commun.* 2011;408:459-464. doi:  
708 10.1016/j.bbrc.2011.04.052.
- 709 26. Achila D, Gulati M, Jain N, Britton RA. Biochemical characterization of ribosome assembly  
710 GTPase RbgA in *Bacillus subtilis*. *J Biol Chem.* 2012;287:8417-8423. doi:  
711 10.1074/jbc.M111.331322.
- 712 27. Rice KP, Egglar AL, Sung P, Cox MM. DNA pairing and strand exchange by the *Escherichia*  
713 *coli* RecA and yeast Rad51 proteins without ATP hydrolysis: on the importance of not getting  
714 stuck. *J Biol Chem.* 2001;276:38570-38581. doi: 10.1074/jbc.M105678200.
- 715 28. Liu Y, Stasiak AZ, Masson JY, McIlwraith MJ, Stasiak A, West SC. Conformational changes  
716 modulate the activity of human RAD51 protein. *J Mol Biol.* 2004;337:817-827. doi:  
717 10.1016/j.jmb.2004.02.022.
- 718 29. Sehorn MG, Sigurdsson S, Bussen W, Unger VM, Sung P. Human meiotic recombinase Dmc1  
719 promotes ATP-dependent homologous DNA strand exchange. *Nature.* 2004;429:433-437. doi:  
720 10.1038/nature02563.
- 721 30. Conway TW. On the role of ammonium or potassium ion in amino acid polymerization. *Proc*  
722 *Natl Acad Sci USA.* 1964;51:1216-1220.
- 723 31. Conway TW, Lipmann F. Characterization of a ribosome-linked guanosine triphosphatase in  
724 *Escherichia coli* extracts. *Proc Natl Acad Sci USA.* 1964;52:1462-1469.
- 725 32. Lubin M, Ennis HL. On the role of intracellular potassium in protein synthesis. *Biochim*  
726 *Biophys Acta.* 1964;80:614-631.
- 727 33. Fasano O, De Vendittis E, Parmeggiani A. Hydrolysis of GTP by elongation factor Tu can be  
728 induced by monovalent cations in the absence of other effectors. *J Biol Chem.* 1982;257:3145-  
729 3150.
- 730 34. Ebel C, Guinet F, Langowski J, Urbanke C, Gagnon J, Zaccai G. Solution studies of elongation  
731 factor Tu from the extreme halophile *Halobacterium marismortui*. *J Mol Biol.* 1992;223:361-  
732 371. doi: 0022-2836(92)90737-5 [pii].
- 733 35. Chinali G, Parmeggiani A. The coupling with polypeptide synthesis of the GTPase activity  
734 dependent on elongation factor G. *J Biol Chem.* 1980;255:7455-7459.
- 735 36. Dubnoff JS, Maitra U. Characterization of the ribosome-dependent guanosine triphosphatase  
736 activity of polypeptide chain initiation factor IF 2. *J Biol Chem.* 1972;247:2876-2883.
- 737 37. Kuhle B, Ficner R. A monovalent cation acts as structural and catalytic cofactor in translational  
738 GTPases. *EMBO J.* 2014;33:2547-2563. doi: 10.15252/embj.201488517.

- 739 38. Mulkidjanian AY, Bychkov AY, Dibrova DV, Galperin MY, Koonin EV. Origin of first cells at  
740 terrestrial, anoxic geothermal fields. *Proc Natl Acad Sci USA*. 2012;109:E821-830. doi:  
741 10.1073/pnas.1117774109.
- 742 39. Dibrova DV, Galperin MY, Koonin EV, Mulkidjanian AY. Ancient systems of  
743 sodium/potassium homeostasis as predecessors of membrane bioenergetics. *Biochemistry*  
744 (Mosc). 2015;80:495-516. doi: 10.1134/S0006297915050016.
- 745 40. Wittinghofer A, Vetter IR. Structure-function relationships of the G domain, a canonical switch  
746 motif. *Annu Rev Biochem*. 2011;80:943-971. doi: 10.1146/annurev-biochem-062708-134043.
- 747 41. Kamerlin SC, Sharma PK, Prasad RB, Warshel A. Why nature really chose phosphate. *Q Rev*  
748 *Biophys*. 2013;46:1-132. doi: 10.1017/S0033583512000157.
- 749 42. Mironov VA, Khrenova MG, Lychko LA, Nemukhin AV. Computational characterization of the  
750 chemical step in the GTP hydrolysis by Ras-GAP for the wild-type and G13V mutated Ras.  
751 *Proteins*. 2015;83:1046-1053. doi: 10.1002/prot.24802.
- 752 43. Gerwert K, Mann D, Kotting C. Common mechanisms of catalysis in small and heterotrimeric  
753 GTPases and their respective GAPs. *Biol Chem*. 2017;398:523-533. doi: 10.1515/hsz-2016-  
754 0314.
- 755 44. Jin Y, Richards NG, Waltho JP, Blackburn GM. Metal fluorides as analogues for studies on  
756 phosphoryl transfer enzymes. *Angew Chem Int Ed Engl*. 2017;56:4110-4128. doi:  
757 10.1002/anie.201606474.
- 758 45. Skulachev VP. Membrane-linked energy buffering as the biological function of Na<sup>+</sup>/K<sup>+</sup> gradient.  
759 *FEBS Lett*. 1978;87:171-179.
- 760 46. Drever JI, Marion GM. The geochemistry of natural waters: surface and groundwater  
761 environments. *J Environ Qual*. 1998;27:245-245.
- 762 47. Oren A. Thermodynamic limits to microbial life at high salt concentrations. *Environ Microbiol*.  
763 2011;13:1908-1923. doi: 10.1111/j.1462-2920.2010.02365.x.
- 764 48. Chappie JS, Acharya S, Leonard M, Schmid SL, Dyda F. G domain dimerization controls  
765 dynamin's assembly-stimulated GTPase activity. *Nature*. 2010;465:435-440. doi:  
766 10.1038/nature09032.
- 767 49. Yan L, Ma Y, Sun Y, Gao J, Chen X, Liu J, Wang C, Rao Z, Lou Z. Structural basis for  
768 mechanochemical role of *Arabidopsis thaliana* dynamin-related protein in membrane fission. *J*  
769 *Mol Cell Biol*. 2011;3:378-381. doi: 10.1093/jmcb/mjr032.
- 770 50. Lowenstein JM. The stimulation of transphosphorylation by alkali-metal ions. *Biochem J*.  
771 1960;75:269-274.
- 772 51. Akola J, Jones RO. ATP hydrolysis in water - A density functional study. *J Phys Chem B*.  
773 2003;107:11774-11783. doi: 10.1021/jp035538g.
- 774 52. Grigorenko BL, Rogov AV, Nemukhin AV. Mechanism of triphosphate hydrolysis in aqueous  
775 solution: QM/MM simulations in water clusters. *J Phys Chem B*. 2006;110:4407-4412. doi:  
776 10.1021/jp056395w.
- 777 53. Harrison CB, Schulten K. Quantum and classical dynamics simulations of ATP hydrolysis in  
778 solution. *J Chem Theory Comput*. 2012;8:2328-2335. doi: 10.1021/ct200886j.
- 779 54. Liao JC, Sun S, Chandler D, Oster G. The conformational states of Mg.ATP in water. *Eur*  
780 *Biophys J*. 2004;33:29-37. doi: 10.1007/s00249-003-0339-2.
- 781 55. Simonson T, Satpati P. Simulating GTP:Mg and GDP:Mg with a simple force field: A structural  
782 and thermodynamic analysis. *J Comput Chem*. 2013;34:836-846. doi: 10.1002/jcc.23207.
- 783 56. Cohn M, Hughes TR, Jr. Nuclear magnetic resonance spectra of adenosine di- and triphosphate.  
784 II. Effect of complexing with divalent metal ions. *J Biol Chem*. 1962;237:176-181. doi.
- 785 57. Jiang L, Mao XA. Conformation of adenosine-5'-triphosphate in the presence of Mg<sup>2+</sup> at  
786 different pH. *Polyhedron*. 2002;21:435-438. doi: 10.1016/S0277-5387(01)01013-0.



- 787 58. Huang SL, Tsai M-D. Does the magnesium(II) ion interact with the  $\alpha$ -phosphate of adenosine-  
788 triphosphate? An investigation by oxygen-17 nuclear magnetic resonance. *Biochemistry*.  
789 1982;21:951-959. doi: 10.1021/Bi00534a021.
- 790 59. Cowan JA. Metallobiochemistry of magnesium. Coordination complexes with biological  
791 substrates: site specificity, kinetics and thermodynamics of binding, and implications for  
792 activity. *Inorg Chem*. 1991;30:2740-2747. doi: 10.1021/Ic00013a008.
- 793 60. Abrahams JP, Leslie AG, Lutter R, Walker JE. Structure at 2.8 Å resolution of F<sub>1</sub>-ATPase from  
794 bovine heart mitochondria. *Nature*. 1994;370:621-628. doi: 10.1038/370621a0.
- 795 61. Schweins T, Wittinghofer A. GTP-binding proteins. Structures, interactions and relationships.  
796 *Curr Biol*. 1994;4:547-550. doi: S0960-9822(00)00122-6.
- 797 62. Scheffzek K, Ahmadian MR, Kabsch W, Wiesmuller L, Lautwein A, Schmitz F, Wittinghofer,  
798 A. The Ras-RasGAP complex: Structural basis for GTPase activation and its loss in oncogenic  
799 Ras mutants. *Science*. 1997;277:333-338. doi: 10.1126/science.277.5324.333.
- 800 63. Harding MM. Metal-ligand geometry relevant to proteins and in proteins: sodium and  
801 potassium. *Acta Crystallogr D Biol Crystallogr*. 2002;58:872-874. doi: S0907444902003712 .
- 802 64. Harding MM. The architecture of metal coordination groups in proteins. *Acta Crystallogr D Biol*  
803 *Crystallogr*. 2004;60:849-859. doi: 10.1107/S0907444904004081.
- 804 65. Sigel A, Sigel H, Sigel RKO, editors. *The Alkali Metal Ions: Their Role for Life*: Springer;  
805 2016.
- 806 66. Vanommeslaeghe K, Hatcher E, Acharya C, Kundu S, Zhong S, Shim J, Darian E, Guvench O,  
807 Lopes P, Vorobyov I, Mackerell AD Jr. CHARMM General Force Field (CGenFF): A force  
808 field for drug-like molecules compatible with the CHARMM all-atom additive biological force  
809 fields. *J Comput Chem*. 2010;31:671-690. doi: 10.1002/Jcc.21367.
- 810 67. Blackburn GM, Cherfils J, Moss GP, Richards NGJ, Waltho JP, Williams NH, Wittinghofer, A.  
811 How to name atoms in phosphates, polyphosphates, their derivatives and mimics, and transition  
812 state analogues for enzyme-catalysed phosphoryl transfer reactions (IUPAC Recommendations  
813 2016). *Pure Appl Chem*. 2017;89:653-675. doi: 10.1515/pac-2016-0202.
- 814 68. Kiani FA, Fischer S. Comparing the catalytic strategy of ATP hydrolysis in biomolecular  
815 motors. *Phys Chem Chem Phys*. 2016;18:20219-20233. doi: 10.1039/c6cp01364c.
- 816 69. Warshel A, Prasad BR. Perspective on Computer Modelling of Enzymatic Reactions. In: Tunon  
817 I, Moliner V, editors. *Simulating Enzyme Reactivity: Computational Methods in Enzyme*  
818 *Catalysis*. RSC Theoretical and Computational Chemistry Series No. 9. London: Royal Society  
819 of Chemistry; 2017. p. 1-30.
- 820 70. Jin Y, Molt RW, Jr., Blackburn GM. Metal fluorides: Tools for structural and computational  
821 analysis of phosphoryl transfer enzymes. *Top Curr Chem (Cham)*. 2017;375:36. doi:  
822 10.1007/s41061-017-0130-y.
- 823 71. Mildvan AS. Role of magnesium and other divalent cations in ATP-utilizing enzymes.  
824 *Magnesium*. 1987;6:28-33.
- 825 72. Chaudhry C, Farr GW, Todd MJ, Rye HS, Brunger AT, Adams PD, Horwich AL, Sigler PB.  
826 Role of the gamma-phosphate of ATP in triggering protein folding by GroEL-GroES: function,  
827 structure and energetics. *EMBO J*. 2003;22:4877-4887. doi: 10.1093/emboj/cdg477.
- 828 73. Wang J, Boisvert DC. Structural basis for GroEL-assisted protein folding from the crystal  
829 structure of (GroEL-KMgATP)<sub>14</sub> at 2.0 Å resolution. *J Mol Biol*. 2003;327:843-855. doi:  
830 S0022283603001840.
- 831 74. Kotting C, Gerwert K. Time-resolved FTIR studies provide activation free energy, activation  
832 enthalpy and activation entropy for GTPase reactions. *Chem Phys*. 2004;307:227-232. doi:  
833 10.1016/j.chemphys.2004.06.051.
- 834 75. Shutes A, Der CJ. Real-time in vitro measurement of intrinsic and Ras GAP-mediated GTP  
835 hydrolysis. *Methods Enzymol*. 2006;407:9-22. doi: S0076-6879(05)07002-3 [pii].

- 836 76. Finn RD, Attwood TK, Babbitt PC, Bateman A, Bork P, Bridge AJ, Chang HY, Dosztányi Z, El-  
837 Gebali S, Fraser M, Gough J, Haft D, Holliday GL, Huang H, Huang X, Letunic I, Lopez R, Lu  
838 S, Marchler-Bauer A, Mi H, Mistry J, Natale DA, Necci M, Nuka G, Orengo CA, Park Y,  
839 Pesseat S, Piovesan D, Potter SC, Rawlings ND, Redaschi N, Richardson L, Rivoire C,  
840 Sangrador-Vegas A, Sigrist C, Sillitoe I, Smithers B, Squizzato S, Sutton G, Thanki N, Thomas  
841 PD, Tosatto SC, Wu CH, Xenarios I, Yeh LS, Young SY, Mitchell AL. InterPro in 2017-beyond  
842 protein family and domain annotations. *Nucleic Acids Res.* 2017;45:D190-D199. doi:  
843 10.1093/nar/gkw1107.
- 844 77. Wittinghofer A. Signaling mechanistics: aluminum fluoride for molecule of the year. *Curr Biol.*  
845 1997;7:R682-R685. doi: S0960-9822(06)00355-1 [pii].
- 846 78. Menz RI, Walker JE, Leslie AG. Structure of bovine mitochondrial F<sub>1</sub>-ATPase with nucleotide  
847 bound to all three catalytic sites: implications for the mechanism of rotary catalysis. *Cell.*  
848 2001;106:331-341. doi: S0092-8674(01)00452-4 [pii].
- 849 79. Goitre L, Trapani E, Trabalzini L, Retta SF. The Ras superfamily of small GTPases: the  
850 unlocked secrets. *Methods Mol Biol.* 2014;1120:1-18. doi: 10.1007/978-1-62703-791-4\_1.
- 851 80. Komoriya Y, Ariga T, Iino R, Imamura H, Okuno D, Noji H. Principal role of the arginine finger  
852 in rotary catalysis of F<sub>1</sub>-ATPase. *J Biol Chem.* 2012;287:15134-15142. doi:  
853 10.1074/jbc.M111.328153.
- 854 81. Vetter IR, Wittinghofer A. Nucleoside triphosphate-binding proteins: different scaffolds to  
855 achieve phosphoryl transfer. *Q Rev Biophys.* 1999;32:1-56.
- 856 82. Li Y, He Y, Luo Y. Conservation of a conformational switch in RadA recombinase from  
857 *Methanococcus maripaludis*. *Acta Crystallogr D Biol Crystallogr.* 2009;65:602-610. doi:  
858 10.1107/S09074444909011871.
- 859 83. Westheimer FH. Why nature chose phosphates. *Science.* 1987;235:1173-1178. doi: DOI  
860 10.1126/science.2434996.
- 861 84. Yang W, Lee JY, Nowotny M. Making and breaking nucleic acids: Two-Mg<sup>2+</sup>-ion catalysis and  
862 substrate specificity. *Mol Cell.* 2006;22:5-13. doi: 10.1016/j.molcel.2006.03.013.
- 863 85. Delbaere LT, Sudom AM, Prasad L, Leduc Y, Goldie H. Structure/function studies of  
864 phosphoryl transfer by phosphoenolpyruvate carboxykinase. *Biochim Biophys Acta.*  
865 2004;1697:271-278. doi: 10.1016/j.bbapap.2003.11.030.
- 866 86. Matte A, Tari LW, Delbaere LT. How do kinases transfer phosphoryl groups? *Structure.*  
867 1998;6:413-419. doi: S0969-2126(98)00043-4 [pii].
- 868 87. Tu C, Zhou X, Tarasov SG, Tropea JE, Austin BP, Waugh DS, Court DL, Ji X. The Era GTPase  
869 recognizes the GAUACCUC sequence and binds helix 45 near the 3' end of 16S rRNA. *Proc*  
870 *Natl Acad Sci USA.* 2011;108:10156-10161. doi: 10.1073/pnas.1017679108.
- 871 88. Shui XQ, Sines CC, McFail-Isom L, VanDerveer D, Williams LD. Structure of the potassium  
872 form of CGCGAATTCGCG: DNA deformation by electrostatic collapse around inorganic  
873 cations. *Biochemistry.* 1998;37:16877-16887. doi: 10.1021/Bi982063o.
- 874 89. Qian X, He Y, Wu Y, Luo Y. Asp302 determines potassium dependence of a RadA recombinase  
875 from *Methanococcus voltae*. *J Mol Biol.* 2006;360:537-547. doi: 10.1016/j.jmb.2006.05.058.
- 876 90. Gogarten JP, Kibak H, Dittrich P, Taiz L, Bowman EJ, Bowman BJ, Manolson MF, Poole RJ,  
877 Date T, Oshima T. Evolution of the vacuolar H<sup>+</sup>-ATPase: implications for the origin of  
878 eukaryotes. *Proc Natl Acad Sci USA.* 1989;86:6661-6665.
- 879 91. Iwabe N, Kuma K, Hasegawa M, Osawa S, Miyata T. Evolutionary relationship of  
880 archaeobacteria, eubacteria, and eukaryotes inferred from phylogenetic trees of duplicated genes.  
881 *Proc Natl Acad Sci USA.* 1989;86:9355-9359.
- 882 92. Leippe DD, Koonin EV, Aravind L. Evolution and classification of P-loop kinases and related  
883 proteins. *J Mol Biol.* 2003;333:781-815. doi: 10.1016/j.jmb.2003.08.040.

- 884 93. Bianchi A, Giorgi C, Ruzza P, Toniolo C, Milner-White EJ. A synthetic hexapeptide designed to  
885 resemble a proteinaceous p-loop nest is shown to bind inorganic phosphate. *Proteins*.  
886 2012;80:1418-1424. doi: 10.1002/prot.24038.
- 887 94. Watson JD, Milner-White EJ. The conformations of polypeptide chains where the main-chain  
888 parts of successive residues are enantiomeric. Their occurrence in cation and anion-binding  
889 regions of proteins. *J Mol Biol*. 2002;315:183-191. doi: 10.1006/jmbi.2001.5228.
- 890 95. Torrance GM, Leader DP, Gilbert DR, Milner-White EJ. A novel main chain motif in proteins  
891 bridged by cationic groups: the niche. *J Mol Biol*. 2009;385:1076-1086. doi:  
892 10.1016/j.jmb.2008.11.007.
- 893 96. Alva V, Lupas AN. From ancestral peptides to designed proteins. *Curr Opin Struct Biol*.  
894 2017;48:103-109. doi: 10.1016/j.sbi.2017.11.006.
- 895 97. Kusmierczyk AR, Martin J. Nested cooperativity and salt dependence of the ATPase activity of  
896 the archaeal chaperonin Mm-cpn. *FEBS Lett*. 2003;547:201-204. doi: S0014579303007221  
897 [pii].
- 898 98. Pereira JH, Ralston CY, Douglas NR, Kumar R, Lopez T, McAndrew RP, Knee KM, King JA,  
899 Frydman J, Adams PD. Mechanism of nucleotide sensing in group II chaperonins. *EMBO J*.  
900 2012;31:731-740. doi: 10.1038/emboj.2011.468.
- 901 99. Grason JP, Gresham JS, Widjaja L, Wehri SC, Lorimer GH. Setting the chaperonin timer: the  
902 effects of  $K^+$  and substrate protein on ATP hydrolysis. *Proc Natl Acad Sci USA*.  
903 2008;105:17334-17338. doi: 10.1073/pnas.0807429105.
- 904 100. Jorgensen WL, Chandrasekhar J, Madura JD, Impey RW, Klein ML. Comparison of simple  
905 potential functions for simulating liquid water *J Chem Phys*. 1983;79:926-935. doi:  
906 10.1063/1.445869.
- 907 101. Callahan KM, Casillas-Iuarte NN, Roeselova M, Allen HC, Tobias DJ. Solvation of magnesium  
908 dication: molecular dynamics simulation and vibrational spectroscopic study of magnesium  
909 chloride in aqueous solutions. *J Phys Chem A*. 2010;114:5141-5148. doi: 10.1021/jp909132a.
- 910 102. Joung IS, Cheatham TE. Determination of alkali and halide monovalent ion parameters for use  
911 in explicitly solvated biomolecular simulations. *J Phys Chem B*. 2008;112:9020-9041. doi:  
912 10.1021/Jp8001614.
- 913 103. Ryckaert J-P, Ciccotti G, Berendsen HJC. Numerical integration of the cartesian equations of  
914 motion of a system with constraints: molecular dynamics of *n*-alkanes. *J Comput Phys*.  
915 1977;23:327-341. doi.
- 916 104. Berendsen HJC, Postma JPM, Vangunsteren WF, Dinola A, Haak JR. Molecular dynamics with  
917 coupling to an external bath. *J Chem Phys*. 1984;81:3684-3690. doi: 10.1063/1.448118.
- 918 105. Feller SE, Zhang YH, Pastor RW, Brooks BR. Constant pressure molecular dynamics  
919 simulation: The Langevin piston method. *J Chem Phys*. 1995;103:4613-4621. doi:  
920 10.1063/1.470648.
- 921 106. Christen M, Hunenberger PH, Bakowies D, Baron R, Burgi R, Geerke DP, Heinz TN,  
922 Kastenholz MA, Kräutler V, Oostenbrink C, Peter C, Trzesniak D, van Gunsteren WF. The  
923 GROMOS software for biomolecular simulation: GROMOS05. *J Comput Chem*. 2005;26:1719-  
924 1751. doi: 10.1002/jcc.20303.
- 925 107. Humphrey W, Dalke A, Schulten K. VMD: Visual molecular dynamics. *J Mol Graph*.  
926 1996;14:33-38. doi: 10.1016/0263-7855(96)00018-5.
- 927 108. MATLAB and Statistics Toolbox Release 2017a. 2017a ed: The MathWorks, Inc., Natick, MA;  
928 2017.
- 929 109. Rose PW, Prlic A, Altunkaya A, Bi C, Bradley AR, Christie CH, Costanzo LD, Duarte JM,  
930 Dutta S, Feng Z, Green RK, Goodsell DS, Hudson B, Kalro T, Lowe R, Peisach E, Randle C,  
931 Rose AS, Shao C, Tao YP, Valasatava Y, Voigt M, Westbrook JD, Woo J, Yang H, Young JY,  
932 Zardecki C, Berman HM, Burley SK. The RCSB protein data bank: integrative view of protein,

- 933 gene and 3D structural information. *Nucleic Acids Res.* 2017;45:D271-D281. doi:  
934 10.1093/nar/gkw1000.
- 935 110. DeLano WL. The PyMOL Molecular Graphics System, Version 1.7.2.1. Schrödinger, LLC.;  
936 2010.
- 937 111. Manikas RG, Thomson E, Thoms M, Hurt E. The K<sup>+</sup>-dependent GTPase Nug1 is implicated in  
938 the association of the helicase Dbp10 to the immature peptidyl transferase centre during  
939 ribosome maturation. *Nucleic Acids Res.* 2016;44:1800-1812. doi: 10.1093/nar/gkw045.
- 940 112. Daigle DM, Brown ED. Studies of the interaction of *Escherichia coli* YjeQ with the ribosome in  
941 vitro. *J Bacteriol.* 2004;186:1381-1387.
- 942 113. Foucher AE, Reiser JB, Ebel C, Housset D, Jault JM. Potassium acts as a GTPase-activating  
943 element on each nucleotide-binding domain of the essential *Bacillus subtilis* EngA. *PLoS One.*  
944 2012;7:e46795. doi: 10.1371/journal.pone.0046795.
- 945 114. Rafay A, Majumdar S, Prakash B. Exploring potassium-dependent GTP hydrolysis in TEES  
946 family GTPases. *FEBS Open Bio.* 2012;2:173-177. doi: 10.1016/j.fob.2012.07.008.
- 947 115. Perez-Arellano I, Spinola-Amilibia M, Bravo J. Human Drg1 is a potassium-dependent GTPase  
948 enhanced by Lerep4. *FEBS J.* 2013;280:3647-3657. doi: 10.1111/febs.12356.
- 949 116. Villarroya M, Prado S, Esteve JM, Soriano MA, Aguado C, Perez-Martinez D, Martínez-  
950 Ferrandis JI, Yim L, Victor VM, Cebolla E, Montaner A, Knecht E, Armengod ME.  
951 Characterization of human GTPBP3, a GTP-binding protein involved in mitochondrial tRNA  
952 modification. *Mol Cell Biol.* 2008;28:7514-7531. doi: 10.1128/MCB.00946-08.
- 953 117. Koenig P, Oreb M, Hofle A, Kaltofen S, Rippe K, Sinning I, Schleiff E, Tews I. The GTPase  
954 cycle of the chloroplast import receptors Toc33/Toc34: Implications from monomeric and  
955 dimeric structures. *Structure.* 2008;16:585-596. doi: 10.1016/j.str.2008.01.008.
- 956 118. Gasper R, Meyer S, Gotthardt K, Sirajuddin M, Wittinghofer A. It takes two to tango: regulation  
957 of G proteins by dimerization. *Nat Rev Mol Cell Biol.* 2009;10:423-429.
- 958 119. Cherfils J, Zeghouf M. Regulation of small GTPases by GEFs, GAPs, and GDIs. *Physiol Rev.*  
959 2013;93:269-309. doi: 10.1152/physrev.00003.2012.
- 960 120. Chen Z, Yang H, Pavletich NP. Mechanism of homologous recombination from the RecA-  
961 ssDNA/dsDNA structures. *Nature.* 2008;453:489-484. doi: 10.1038/nature06971.
- 962 121. Walker J. ATP synthesis by rotary catalysis. *Angew Chem Int Ed Engl.* 1998;37:2309-2319. doi:  
963 122. Senior AE, Nadanaciva S, Weber J. The molecular mechanism of ATP synthesis by F<sub>1</sub>F<sub>0</sub>-ATP  
964 synthase. *Biochim Biophys Acta.* 2002;1553:188-211. doi: S0005272802001858 [pii].
- 965 123. Skordalakes E, Berger JM. Structural insights into RNA-dependent ring closure and ATPase  
966 activation by the Rho termination factor. *Cell.* 2006;127:553-564. doi:  
967 10.1016/j.cell.2006.08.051.
- 968 124. Meier TI, Peery RB, McAllister KA, Zhao G. Era GTPase of *Escherichia coli*: binding to 16S  
969 rRNA and modulation of GTPase activity by RNA and carbohydrates. *Microbiology.*  
970 2000;146:1071-1083. doi: 10.1099/00221287-146-5-1071.
- 971  
972

973

974 **Table 1.** Effects of monovalent cations on the shape of the triphosphate chain of the  $\text{Mg}^{2+}$ -ATP  
 975 complex in water, as inferred from the MD simulation data.

| Added cation    | Conformation of the triphosphate chain of $\text{Mg-ATP}^a$ |                                             |                                                       |                                             |                                     |                                             |
|-----------------|-------------------------------------------------------------|---------------------------------------------|-------------------------------------------------------|---------------------------------------------|-------------------------------------|---------------------------------------------|
|                 | $\beta\gamma$ -coordination                                 |                                             | $\beta\gamma$ -coordination, "curled" phosphate chain |                                             | $\alpha\beta\gamma$ -coordination   |                                             |
|                 | $\text{P}^A\text{-P}^G$ distance, Å                         | $\text{P}^B\text{-O}^{3B}\text{-P}^G$ angle | $\text{P}^A\text{-P}^G$ distance, Å                   | $\text{P}^B\text{-O}^{3B}\text{-P}^G$ angle | $\text{P}^A\text{-P}^G$ distance, Å | $\text{P}^B\text{-O}^{3B}\text{-P}^G$ angle |
| None            | $5.46 \pm 0.34$                                             | $122.3 \pm 3.5$                             | N/A                                                   |                                             | $4.76 \pm 0.18$                     | $124.9 \pm 3.3$                             |
| $\text{K}^+$    | $4.91 \pm 0.24$                                             | $122.0 \pm 3.3$                             | N/A                                                   |                                             | $4.32 \pm 0.24$                     | $128.0 \pm 3.5$                             |
| $\text{Na}^+$   | $4.69 \pm 0.22$                                             | $122.9 \pm 3.2$                             | $4.60 \pm 0.22$                                       | $124.0 \pm 3.3$                             | $4.26 \pm 0.37$                     | $127.7 \pm 3.6$                             |
| $\text{NH}_4^+$ | $4.85 \pm 0.22$                                             | $122.3 \pm 3.3$                             | $4.56 \pm 0.21$                                       | $124.6 \pm 3.3$                             | $4.22 \pm 0.16$                     | $127.8 \pm 3.9$                             |

976

977 <sup>a</sup> -The conformations of the  $\text{Mg}^{2+}$ -ATP complex were determined as described in the text and Fig. 4.  
 978 Mean values and standard deviations of  $\text{P}^A\text{-P}^G$  distance (in Å) and the  $\text{P}^B\text{-O}^{3B}\text{-P}^G$  angle (in degrees)  
 979 were measured over the respective parts of the simulations. Simulation periods corresponding to  $\beta\gamma$   
 980 and  $\alpha\beta\gamma$  conformations were identified by tracking distances between  $\text{Mg}^{2+}$  and non-bridging  
 981 oxygen atoms of the phosphate chain (Fig. S3); simulation periods corresponding to the "curled"  
 982 conformation were identified from  $\text{P}^A\text{-P}^G$  distance tracks and visual inspection of the phosphate  
 983 chain shape (Fig. 3). Data for the  $\alpha\beta\gamma$  coordination of the  $\text{Mg}^{2+}$ -ATP complex and conformations  
 984 with curled phosphate chain were calculated from simulations 1-4 in Table S3; characterization of  
 985 the  $\beta\gamma$ -coordination was based on simulations 5-8 in Table S3, see Table S5 for further details.

986

987

988

989 **Table 2. Activation mechanisms within the classes of P-loop NTPases that contain both cation-**  
 990 **dependent and cation-independent enzymes**

| Superfamily                                 | Family           | Activating charge               | Activation mechanism                                                                                                                     |
|---------------------------------------------|------------------|---------------------------------|------------------------------------------------------------------------------------------------------------------------------------------|
| <b>Kinase-GTPase division, TRAFAC class</b> |                  |                                 |                                                                                                                                          |
| Classic translation factor GTPases          | <b>EF-G/EF-2</b> | K <sup>+</sup>                  | Functional interaction with ribosomal RNA/other protein(s)/other domain(s) of the same protein (22, 23, 25, 26, 33, 34, 36, 37, 111-116) |
|                                             | EF-Tu/EF-1A      | K <sup>+</sup>                  |                                                                                                                                          |
|                                             | EIF2G            | K <sup>+</sup>                  |                                                                                                                                          |
|                                             | ERF3             | K <sup>+</sup>                  |                                                                                                                                          |
|                                             | IF-2             | K <sup>+</sup>                  |                                                                                                                                          |
|                                             | LepA             | K <sup>+</sup>                  |                                                                                                                                          |
| OBG-HflX-like GTPases                       | HflX             | K <sup>+</sup>                  |                                                                                                                                          |
|                                             | OBG              | K <sup>+</sup>                  |                                                                                                                                          |
|                                             | NOG              | K <sup>+</sup>                  |                                                                                                                                          |
|                                             | YchF/OLA1        | K <sup>+</sup>                  |                                                                                                                                          |
| YlqF/YawG GTPases                           | NOG2             | K <sup>+</sup>                  |                                                                                                                                          |
|                                             | RsgA             | K <sup>+</sup>                  |                                                                                                                                          |
| TrmE-Era-EngA-EngB-Septin-like GTPases      | EngA (Der)       | K <sup>+</sup>                  |                                                                                                                                          |
|                                             | EngB             | K <sup>+</sup>                  |                                                                                                                                          |
|                                             | Era              | K <sup>+</sup>                  |                                                                                                                                          |
|                                             | FeoB             | K <sup>+</sup>                  |                                                                                                                                          |
|                                             | MnmE             | K <sup>+</sup>                  |                                                                                                                                          |
|                                             | Septin           | Arg finger                      |                                                                                                                                          |
|                                             | Toc34-like       | Arg finger                      |                                                                                                                                          |
| Dynamin-like GTPases                        | hGBP             | Arg finger                      |                                                                                                                                          |
|                                             | Dynamin          | K <sup>+</sup> /Na <sup>+</sup> |                                                                                                                                          |
| Extended Ras                                | Ras family       | Arg finger                      | Interaction with a specialized activating protein or domain(13, 119)                                                                     |
|                                             | Gα subunits      | Arg finger                      |                                                                                                                                          |
| Myosin/kinesin                              | Myosin           | Arg finger                      |                                                                                                                                          |
|                                             | Kinesin          | Arg finger                      |                                                                                                                                          |
| <b>ASCE division, RecA/F1-like class</b>    |                  |                                 |                                                                                                                                          |
| DNA-repair and recombination ATPases        | RecA             | Lys finger                      | DNA/RNA-dependent oligomerization(120)                                                                                                   |
|                                             | RadA             | K <sup>+</sup>                  |                                                                                                                                          |
| Rho helicases                               | Rho              | Arg finger                      | Interaction with the neighboring subunit within a conformationally coupled hexamer (80, 121-123)                                         |
| T3SS ATPases                                | YscN             | Arg finger                      |                                                                                                                                          |
|                                             | Flil             | Arg finger                      |                                                                                                                                          |
| F-/V-type ATPases                           | V-type A         | Arg finger                      |                                                                                                                                          |
|                                             | F-type β         |                                 |                                                                                                                                          |
|                                             | V-type B         |                                 |                                                                                                                                          |

991 | | F-type  $\alpha$  | |

992 **Table 3. Monovalent cation binding in crystal structures of P-loop NTPases.**

| Protein                                        | PDB entry | NTP analog                        | Charge in AG site             |                                             |                                             | Phosphate chain shape                                   |                                                                             |
|------------------------------------------------|-----------|-----------------------------------|-------------------------------|---------------------------------------------|---------------------------------------------|---------------------------------------------------------|-----------------------------------------------------------------------------|
|                                                |           |                                   | Cation                        | Distance to P <sup>A</sup> , Å <sup>a</sup> | Distance to P <sup>G</sup> , Å <sup>a</sup> | P <sup>A</sup> -P <sup>G</sup> distance, Å <sup>a</sup> | P <sup>B</sup> -O <sup>3B</sup> -P <sup>G</sup> angle, degrees <sup>a</sup> |
| TRAFAC class NTPases                           |           |                                   |                               |                                             |                                             |                                                         |                                                                             |
| GTPase                                         | 2gj8      | GDP AlF <sub>4</sub> <sup>-</sup> | K <sup>+</sup>                | 2.8                                         | 2.6                                         | 5.4                                                     | 136.3                                                                       |
| MnmE(TrmE)                                     | 2gja      | GDP AlF <sub>4</sub> <sup>-</sup> | NH <sub>4</sub> <sup>+</sup>  | 2.9                                         | 2.5                                         | 5.4                                                     | 136.9                                                                       |
|                                                | 2gj9      | GDP AlF <sub>4</sub> <sup>-</sup> | Rb <sup>+</sup>               | 2.9                                         | 2.8                                         | 5.5                                                     | 131.6                                                                       |
| GTPase FeoB                                    | 3ss8      | GDP AlF <sub>4</sub> <sup>-</sup> | K <sup>+</sup>                | 2.8                                         | 2.6                                         | 5.4                                                     | 144.9                                                                       |
| Dynammin -like proteins                        | 2x2e      | GDP AlF <sub>4</sub> <sup>-</sup> | Na <sup>+</sup>               | 4.0                                         | 2.5                                         | 5.3                                                     | 131.2                                                                       |
|                                                | 2x2f      | GDP AlF <sub>4</sub> <sup>-</sup> | Na <sup>+</sup>               | 4.1                                         | 2.6                                         | 5.3                                                     | 133.6                                                                       |
|                                                | 3w6p      | GDP AlF <sub>4</sub> <sup>-</sup> | Na <sup>+</sup>               | 4                                           | 2.4                                         | 5.5                                                     | 135.3                                                                       |
|                                                | 3t34      | GDP AlF <sub>4</sub> <sup>-</sup> | Na <sup>+</sup>               | 3.8                                         | 2.4                                         | 5.6                                                     | 149.3                                                                       |
| GTPase Era                                     | 3r9w      | GNP                               | H <sub>2</sub> O <sup>b</sup> | 3                                           | 3.4                                         | 5.1                                                     | 129.2                                                                       |
| Eukaryotic translation initiation factor eIF5B | 4ncn      | GTP                               | Na <sup>+</sup>               | 2.4                                         | 2.4                                         | 5.0                                                     | 126.6                                                                       |
|                                                | 4tmv      | GSP                               | Na <sup>+</sup>               | 2.4                                         | 2.8 (S) <sup>c</sup>                        | 4.9                                                     | 126.3                                                                       |
|                                                | 4tmw      | GTP                               | Na <sup>+</sup>               | 2.4                                         | 2.4                                         | 4.9                                                     | 125.9                                                                       |
|                                                | 4tmz      | GSP                               | K <sup>+</sup>                | 2.7                                         | 3.3 (S) <sup>c</sup>                        | 4.9                                                     | 122.1                                                                       |
| F <sub>1</sub> -RecA-like class NTPases        |           |                                   |                               |                                             |                                             |                                                         |                                                                             |
| DNA recombinase RadA                           | 3ew9      | ANP                               | K <sup>+</sup>                | 6.2                                         | 3.3                                         | 5.1                                                     | 124.5                                                                       |
|                                                | 2f1h      | ANP                               | K <sup>+</sup>                | 6.6                                         | 3.5                                         | 5.3                                                     | 125.3                                                                       |
|                                                | 2fpm      | ANP                               | K <sup>+</sup>                | 5.9                                         | 2.6                                         | 5.1                                                     | 124.2                                                                       |
|                                                | 1xu4      | ANP                               | K <sup>+</sup>                | 6.1                                         | 2.7                                         | 5.2                                                     | 125.0                                                                       |

993 <sup>a</sup> – These values were measured directly in the respective protein structures displayed in PyMOL.

994 <sup>b</sup> – While GTPase Era has been shown to be K<sup>+</sup>-dependent (114, 124), the crystallization solution  
 995 contained no K<sup>+</sup>, only Na<sup>+</sup>, so that the likely cation-binding site is occupied by a water molecule,  
 996 which forms hydrogen bonds with K<sup>+</sup> ligands.

997 <sup>c</sup> – Non-hydrolyzable GTP analog GDP-monothiophosphate (GSP) contains a sulfur atom in the  
 998 place of the O<sup>1G</sup> atom of γ-phosphate; this atom is involved in coordination of monovalent cations in  
 999 respective structures.



1000

1001 **Figures**

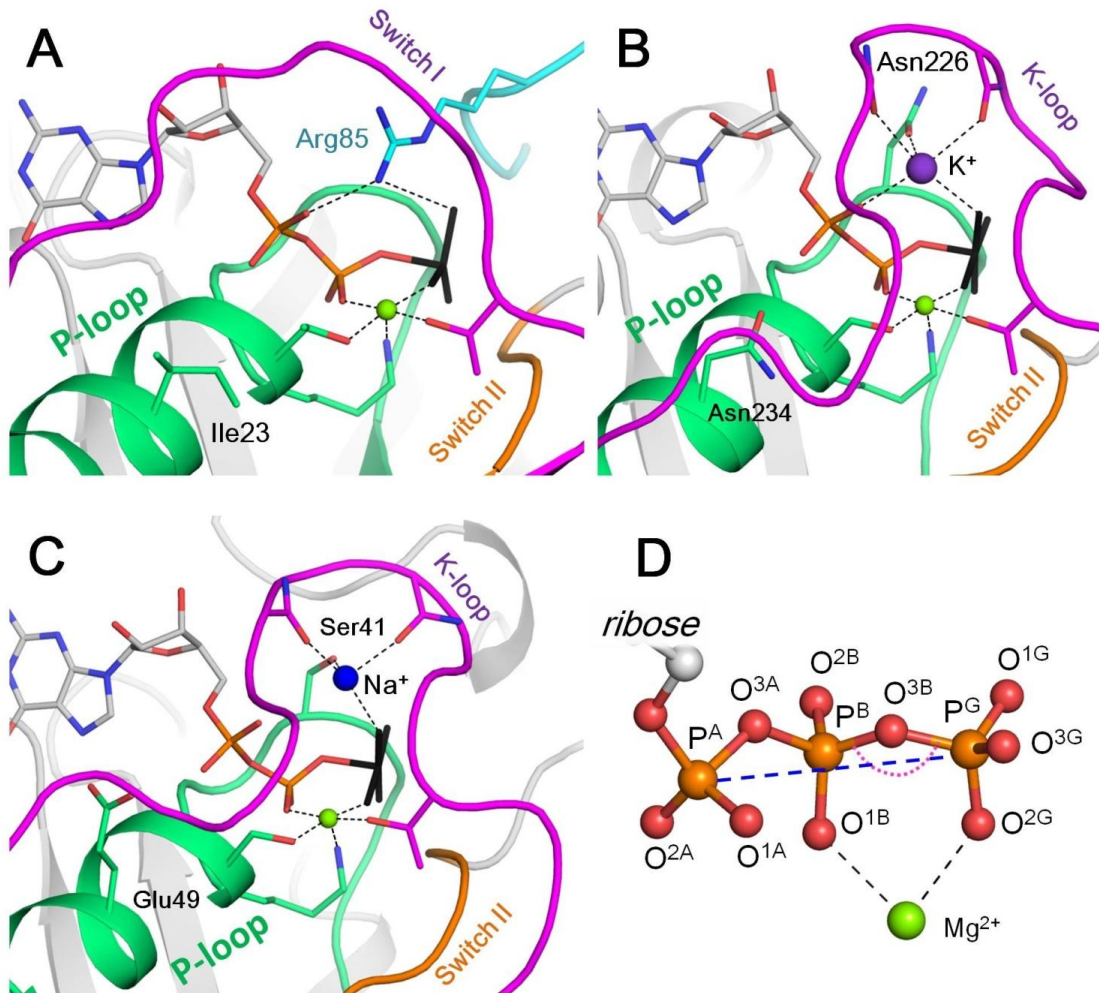

1002

1003 **Figure 1.** Mg-NTP complexes and their binding in the active sites of P-loop NTPases. Phosphate  
1004 chains of NTP molecules and their analogs are colored by atoms: oxygen atoms in red, phosphorus  
1005 in orange. The K<sup>+</sup> ion is shown as a purple sphere, Na<sup>+</sup> ion is shown as a blue sphere, Mg<sup>2+</sup> ions are  
1006 shown as green spheres. Phosphate chain is shown in stick representation with oxygens in red and  
1007 phosphorus atoms in orange;  $\gamma$ -phosphate mimicking groups ( $\text{AlF}_4^-$  and  $\text{MgF}_3^-$ ) are shown in black,  
1008 coordination and hydrogen bonds are shown as black dashed lines. **A.** Active site of the small Ras-  
1009 like GTPase RhoA in complex with the activating protein RhoGAP [PDB entry 1OW3]; the bound

1010 GDP-MgF<sub>3</sub> mimics the transition state. The P-loop with the preceding  $\alpha$ -helix is shown as green  
1011 cartoon; Switch I motif with the conserved Mg<sup>2+</sup>-binding Thr residue is shown in magenta; Switch II  
1012 motif (DxxG motif, which starts from the conserved Asp of the Walker B motif) is shown in orange;  
1013 the Arg finger of RhoGAP is colored turquoise. **B.** Active site of the K<sup>+</sup>-dependent GTPase MnmE  
1014 with bound GDP-AlF<sub>4</sub> [PDB: 2GJ8]. Switch I region and the K-loop are shown in magenta. **C.** The  
1015 active site of dynamin, a Na<sup>+</sup>-adapted GTPase with bound GDP-AlF<sub>4</sub> [PDB: 2X2E]. The P-loop and  
1016 K-loop (Switch I region) are colored as in panels A and B. **D.** Structure of the NTP triphosphate  
1017 chain with Mg<sup>2+</sup> ion in a bidentate coordination, referred to as the  $\beta\gamma$  conformation. The pink dotted  
1018 arch indicates the P<sup>B</sup>-O<sup>3B</sup>-P<sup>G</sup> angle; the blue dashed line indicates the P<sup>A</sup>-P<sup>G</sup> distance. The atom  
1019 names are in accordance with the CHARMM naming scheme (66) and the recent IUPAC  
1020 recommendations (67).

1021

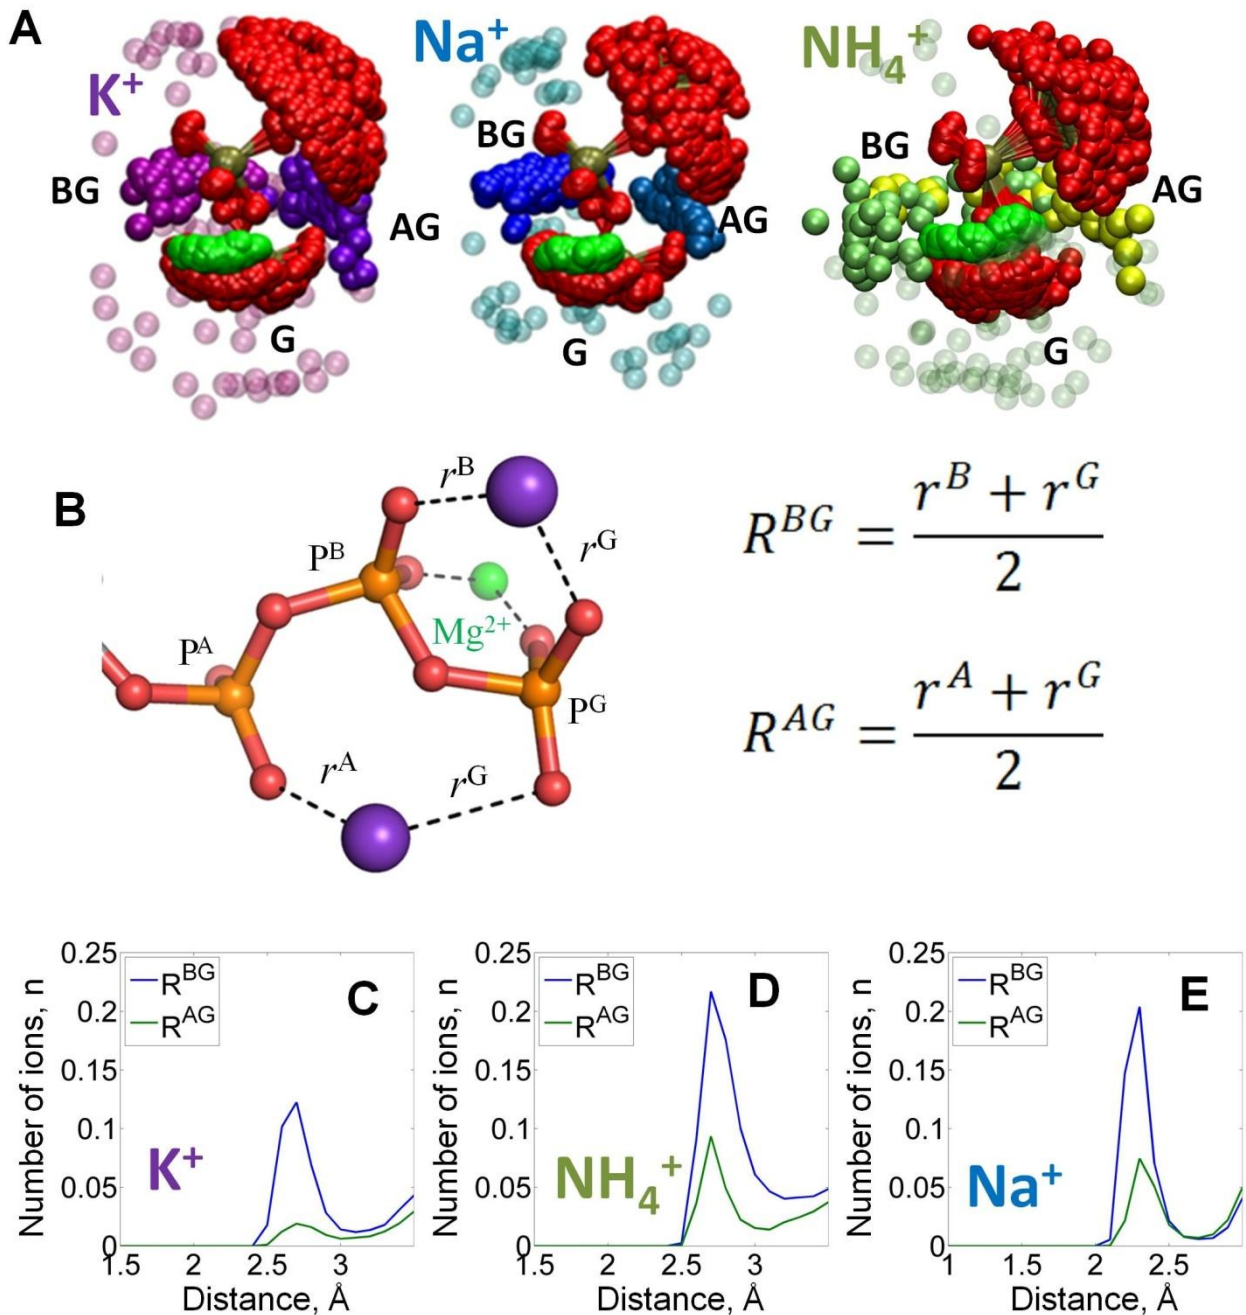

1022

1023 **Figure 2.** Binding of monovalent cations to the Mg-ATP in water. The color scheme is as in Fig. 1.

1024 A, Superposition of the ATP phosphate chain conformations observed in the MD simulations in the

1025 presence of  $K^+$  ions (shown in purple);  $Na^+$  ions (shown in blue) and  $NH_4^+$  ions (nitrogen atoms of

1026  $NH_4^+$  ions are shown in yellow/green). The ribose and adenine moieties are not shown, the

1027 phosphate chain is shown with  $P^A$  on top and  $P^G$  at the bottom. All cations within  $5\text{\AA}$  from the

1028 phosphate chain are shown and colored in different shades depending on the nearby oxygen atoms to  
1029 illustrate the distinction between binding in the AG and BG sites (see text for details). Transparent  
1030 spheres signify the ions outside the AG and BG sites. The constellation of ions in the vicinity of  $\gamma$ -  
1031 phosphate is referred to as the site G. B, Geometry of the Mg-ATP complex with two monovalent  
1032 cations bound, one in the AG site and one in the BG site. Distances to the AG and BG binding sites  
1033 ( $R^{AG}$  and  $R^{BG}$ ) were calculated as averages of the distances to the two corresponding oxygen atoms.  
1034 The distances to the oxygen atoms (e.g.  $r^A$ ) were defined as the shortest distances between a  
1035 particular  $M^+$  ion and any oxygen atom of the respective phosphate group (including ester oxygen  
1036 atoms). C-E, distance distributions for  $K^+$ ,  $NH_4^+$ , and  $Na^+$  ions in the AG and BG sites.

1037

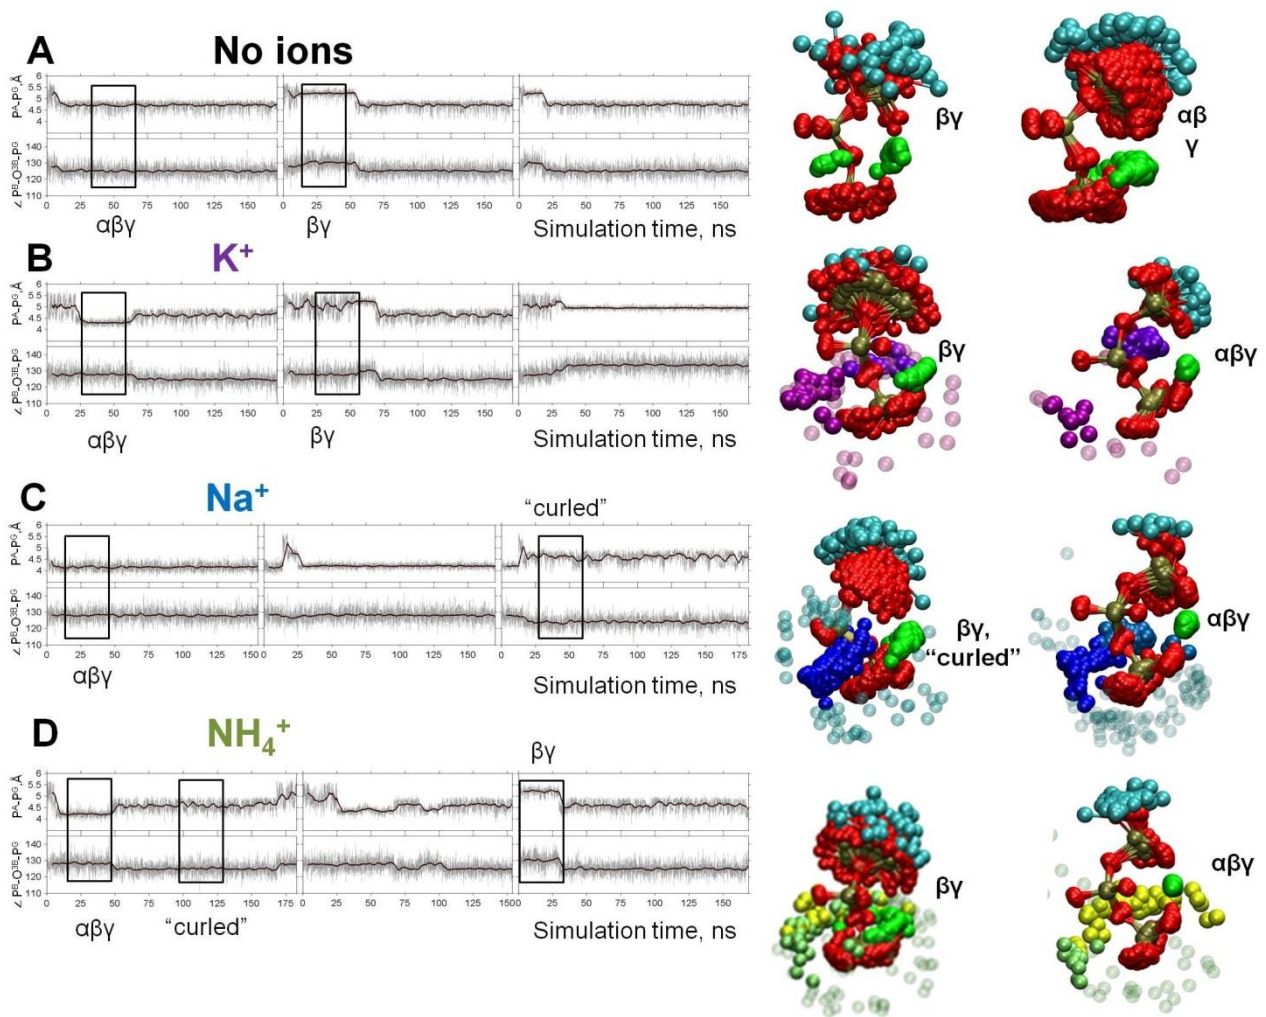

1038

1039 **Figure 3.** Dynamics of the phosphate chain of the Mg-ATP complex with and without monovalent  
 1040 cations. Each left panel shows the  $P^A-P^G$  distance (upper trace) and the  $P^B-O^{3B}-P^G$  angle (bottom  
 1041 trace) in the course of MD simulations. Thin gray lines show actual values measured from each  
 1042 frame of the MD simulation, the bold black lines show moving average with a 2-ps window. Black  
 1043 boxes indicate fragments of simulations chosen for the analyses of particular types of interaction  
 1044 between the  $Mg^{2+}$  ion and the triphosphate chain; the respective conformations of Mg-ATP are  
 1045 shown on the right. The analysis was performed as in Fig. 2B. The color scheme is as in Fig. 1. A,  
 1046 no added ions; B–D, MD simulations in the presence of  $K^+$ ,  $Na^+$ , and  $NH_4^+$ , respectively.

1047

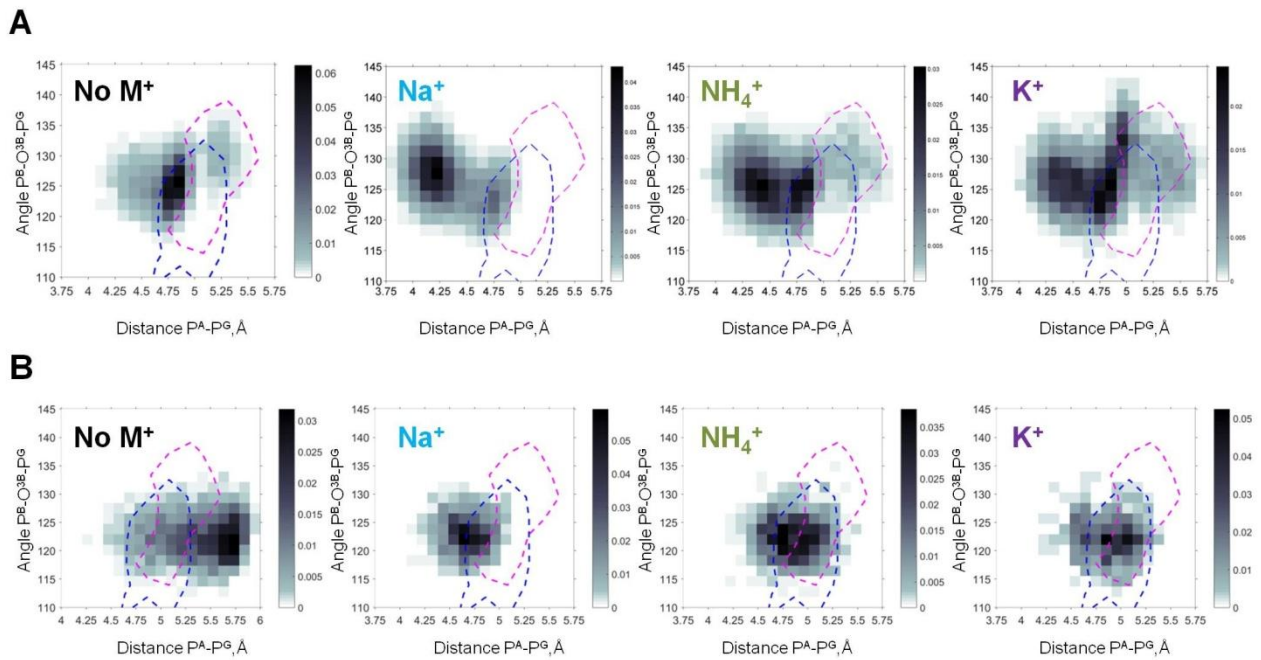

1048

1049 **Figure 4.** Heat maps of the Mg-ATP phosphate chain conformations distribution characterized by  
1050 the P<sup>A</sup>-P<sup>G</sup> distances (X-axis) and P<sup>B</sup>-O<sup>3B</sup>-P<sup>G</sup> angles (Y-axis). Heat maps for systems with  
1051 monovalent cations include only conformations of Mg-ATP complexes with at least one cation  
1052 present within 4 Å radius. The color intensity is proportional to the probability (normalized  
1053 frequency) of the respective conformation. Magenta dashed lines outline the areas corresponding to  
1054 the conformations of transition state analogs; blue dashed lines outline the areas corresponding to  
1055 the conformations of the non-hydrolyzable analogs, calculated from crystal structures of P-loop  
1056 NTPases (Fig. S4). **A.** Data from the 3x170 ns simulations (no. 1 - 4 in Table S3). **B.** Data from  
1057 4x20 ns simulations of Mg-ATP in βγ conformations (no. 5-8 in Table S3, Table S5).

1058

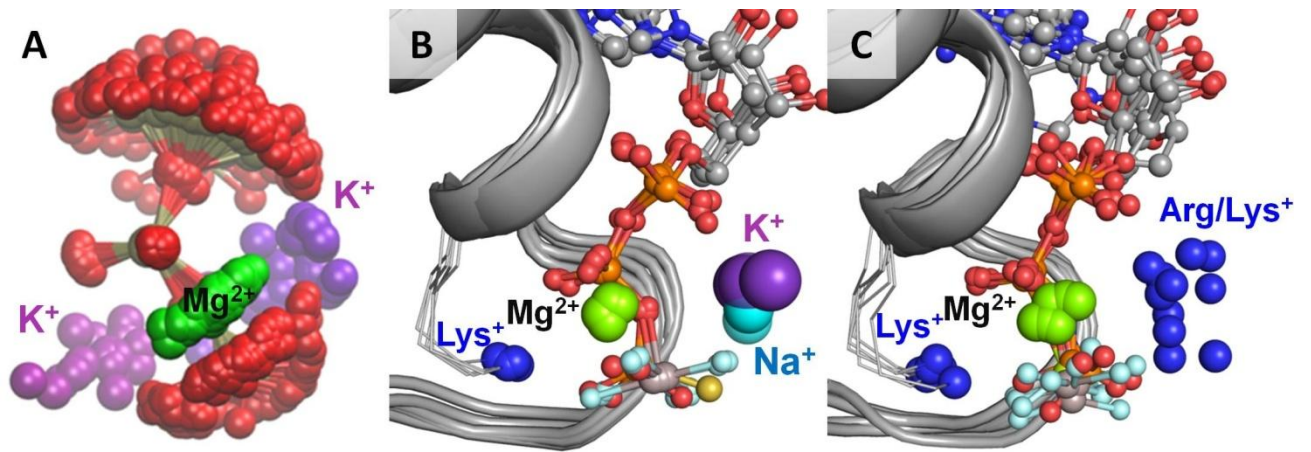

1059

1060 **Figure 5.** Location of positive charges around the phosphate chain of Mg-NTP complexes in  
1061 solution and in protein structures. The color scheme is as in Fig. 1; blue spheres indicate positions of  
1062 positively charged side-chain nitrogen atoms of Lys and Arg residues, P-loop regions are shown as  
1063 cartoons in grey. **A.** Superposition of phosphate chain conformations observed in MD simulations  
1064 with K<sup>+</sup> ions. Only conformations with βγ coordination of Mg<sup>2+</sup> are shown. **B.** Superposition of P-  
1065 loop regions of crystal structures of cation-dependent P-loop NTPases: GTPase MnmE [PDB 2GJ8],  
1066 Fe transporter FeoB [PDB: 3SS8], dynamin-like protein [PDB: 2X2E], and translation factor eIF-B5  
1067 [PDB 4TMZ], see Table 3 for details. **C.** Superposition of P-loop regions of crystal structures of  
1068 cation-independent P-loop NTPases: Ras/RasGAP complex [PDB 1WQ1], septin [PDB 3FTQ],  
1069 atlastin [PDB 4IDQ], G<sub>α12</sub> protein [PDB 1ZCA], DNA polymerase III subunit τ [PDB 3GLF], F<sub>1</sub>-  
1070 ATPase [PDB 2JDI].

1071

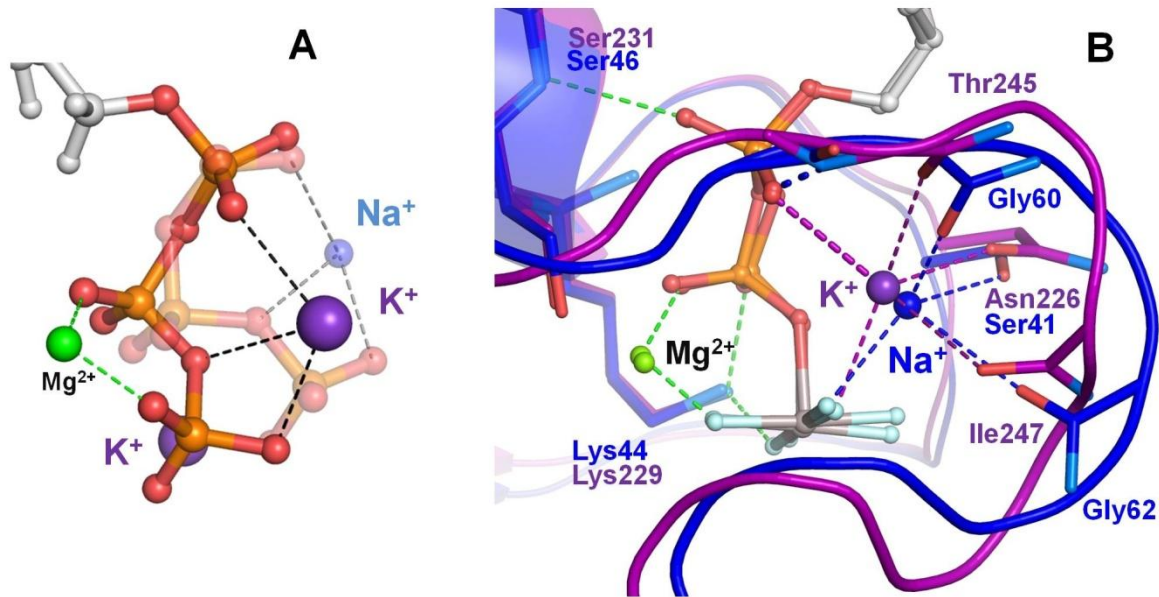

1072

1073 **Figure 6.** Effects of  $\text{Na}^+$  binding on the shape of phosphate chain in solution and in  $\text{Na}^+$ -adapted P-  
1074 loop NTPases. The color scheme is as in Fig. 1, except that Al and F atoms in the  $\text{GDP-AlF}_4$   
1075 complexes are colored grey and cyan, respectively. **A**, Superposition of the  $\text{K}^+$ -bound (solid  
1076 structure) and  $\text{Na}^+$ -bound (transparent structure) conformations of the triphosphate chain as obtained  
1077 from MD simulations of an ATP molecule in water. Data from MD simulations 4 - 8 in Table S3.  
1078 **B**. Superposition of the P-loop NTPase structures with a bound  $\text{K}^+$  ion (MnmE GTPase, PDB: 2GJ8  
1079 (15), purple) and  $\text{Na}^+$  ion (dynammin, PDB: 2X2E (48), blue). Proteins are shown as cartoon. Dashed  
1080 lines indicate hydrogen bonds and coordination bonds. Bonds that occur in all P-loop NTPases are  
1081 shown in green, those that occur in  $\text{K}^+$ -binding proteins are in purple, those bonds that occur in  $\text{Na}^+$ -  
1082 binding dynammin-like proteins are in blue. The thick dashed purple line indicates the bond between  
1083 the  $\text{K}^+$  ion and the oxygen atom of  $\alpha$ -phosphate, which is absent in dynammins. The thick dashed blue  
1084 line indicates the dynammin-specific H-bond between  $\text{O}^{2A}$  atom and the backbone amide group of the  
1085 shortened K-loop.

1086



## Supplementary Materials to Shalaeva *et al.* “Evolution of cation binding in the active sites of P-loop nucleoside triphosphatases ”

**Table S1. Monovalent cation requirements of P-loop GTPases and ATPases**

| <b>TRAFAC class</b>                                 |                   |                                     |                  |
|-----------------------------------------------------|-------------------|-------------------------------------|------------------|
| <b>Protein name</b>                                 | <b>UniProt ID</b> | <b>Cation dependence</b>            | <b>Reference</b> |
| Dynamin-1                                           | DYN1_HUMAN        | K <sup>+</sup> >Na <sup>+</sup>     | (1)              |
| Dynamin-related protein 1A                          | DRP1A_ARATH       | K <sup>+</sup> , Na <sup>+</sup>    | (2)              |
| GTPase Nug1                                         | G0SEW3_CHATD      | K <sup>+</sup> >Na <sup>+</sup>     | (3)              |
| Ribosome biogenesis GTPase A                        | RBGA_BACSU        | K <sup>+</sup> , no Na <sup>+</sup> | (4)              |
| Ribosome biogenesis GTPase RsgA (YjeQ)              | RSGA_ECOLI        | K <sup>+</sup>                      | (5)              |
| Elongation Factor Tu, <i>E. coli</i>                | EFTU1_ECOLI       | K <sup>+</sup> >Na <sup>+</sup>     | (6)              |
| Elongation Factor Tu, <i>Haloarcula marismortui</i> | EF1A_HALMA        | K <sup>+</sup> >Na <sup>+</sup>     | (7)              |
| Eukaryotic translation initiation factor 5B         | IF2P_CHATD        | Na <sup>+</sup> , K <sup>+</sup>    | (8)              |
| Initiation factor IF-2                              | IF2_ECOLI         | K <sup>+</sup>                      | (9)              |
| tRNA modification GTPase MnmE                       | MNME_ECOLI        | K <sup>+</sup> , no Na <sup>+</sup> | (10)             |
| Ferrous iron transporter B                          | Q5M586_STRT2      | K <sup>+</sup> , no Na <sup>+</sup> | (11)             |
| Ribosome-binding ATPase YchF                        | YCHF_ECOLI        | K <sup>+</sup> , no Na <sup>+</sup> | (12)             |
| GTPase HflX*                                        | HFLX_BACSU        | K <sup>+</sup>                      | (13)             |
| GTPase Era                                          | ERA_BACSU         | K <sup>+</sup> , no Na <sup>+</sup> | (13)             |
| GTP-binding protein EngA** <i>B. subtilis</i>       | DER_BACSU         | K <sup>+</sup> , no Na <sup>+</sup> | (13, 14)         |
| GTP-binding protein EngA** <i>T. maritima</i>       | DER_THEMA         | K <sup>+</sup> , no Na <sup>+</sup> | (15)             |
| NO-associated protein 1                             | NOA1_ARATH        | K <sup>+</sup>                      | (16)             |
| Ribosome Assembly GTPase YqeH                       | YQEH_BACSU        | K <sup>+</sup> , no Na <sup>+</sup> | (17)             |
| Developmentally-regulated GTP-binding protein 1     | DRG1_HUMAN        | K <sup>+</sup>                      | (18)             |
| GTP-binding protein EngB                            | ENGB_BACSU        | K <sup>+</sup> *                    | (13)             |
| Human GTPBP3                                        | GTPB3_HUMAN       | K <sup>+</sup>                      | (19)             |

**Table S1. Monovalent cation requirements of P-loop GTPases and ATPases (continued)**

| <b>RecA-like family</b>                            |             |                                     |      |
|----------------------------------------------------|-------------|-------------------------------------|------|
| Human meiotic recombinase Dmc1                     | DMC1_HUMAN  | K <sup>+</sup>                      | (20) |
| Human DNA repair protein RAD51                     | RAD51_HUMAN | K <sup>+</sup>                      | (21) |
|                                                    |             | K <sup>+</sup> , no Na <sup>+</sup> | (22) |
| Yeast DNA repair protein RAD51                     | RAD51_YEAST | K <sup>+</sup>                      | (23) |
| DNA repair protein RadA from <i>M. voltae</i>      | RADA_METVO  | K <sup>+</sup>                      | (24) |
| DNA repair protein RadA from <i>M. maripaludis</i> | RADA_METMI  | K <sup>+</sup> , no Na <sup>+</sup> | (25) |

In the 'Cation dependence' column, 'K<sup>+</sup>' indicates that only K<sup>+</sup>-dependence has been shown; 'K<sup>+</sup>, no Na<sup>+</sup>' indicates activation by K<sup>+</sup> ions and a lack of activation by Na<sup>+</sup> ions; 'K<sup>+</sup>>Na<sup>+</sup>' denotes more effective activation by K<sup>+</sup> than by Na<sup>+</sup> ions; 'K<sup>+</sup>, Na<sup>+</sup>' and 'Na<sup>+</sup>, K<sup>+</sup>' is used when both cations have similar effects, with the more effective one listed first.

\* The GTPase activity was measured at the same concentrations of KCl and NaCl of 200 mM, and for some proteins (the second GTPase domain of EngA, HflX, EngB, all from *B. subtilis*), the lack of activation by cations has been reported (13). However, higher concentrations of ions may be required for these proteins in the absence of their activating partners, as has been shown for the second GTPase domain of EngA (14).

\*\* This protein has two P-loop GTPase domains, activity measurements were reported for the whole protein.

**Table S2. Properties of monovalent cations and their interaction with the Mg<sup>2+</sup>-ATP complex.**

| Cation                       | Ionic radius (Å) <sup>b</sup> | Stimulation of transphosphorylation, %, <sup>a</sup> | Binding to ATP in the absence of Mg <sup>2+</sup> (log(K <sub>B</sub> ), 25°C) |                          |                   | Binding to Mg-ATP (log(K <sub>B</sub> )) <sup>f</sup> |
|------------------------------|-------------------------------|------------------------------------------------------|--------------------------------------------------------------------------------|--------------------------|-------------------|-------------------------------------------------------|
|                              |                               |                                                      |                                                                                |                          |                   |                                                       |
| Na <sup>+</sup>              | 1.02                          | 28                                                   | 1.31±0.03 <sup>c</sup>                                                         | 1.989±0.007 <sup>d</sup> | 1.93 <sup>e</sup> | <b>2.76</b>                                           |
| K <sup>+</sup>               | 1.38                          | 64-73*                                               | 1.17±0.03 <sup>c</sup>                                                         | 1.873±0.005 <sup>d</sup> | 1.99 <sup>e</sup> | <b>0.88</b>                                           |
| NH <sub>4</sub> <sup>+</sup> | 1.44                          | 27                                                   | N/A                                                                            |                          |                   | <b>1.76</b>                                           |

\* measured for different salts: 64% with KCl and 73% with K<sub>2</sub>SO<sub>4</sub>.

*a* – data from (26); stimulation of transphosphorylation by 100 mM M<sup>+</sup> in the presence of 50 μM MnCl<sub>2</sub>.

*b* – data from (27)

*c* – data from (28)

*d* – data from (29)

*e* – data from (30)

*f* – calculated from MD simulations

**Table S3. Molecular dynamics simulations performed in this work**

| No. | System                               | Simulation time | Number of repetitions |
|-----|--------------------------------------|-----------------|-----------------------|
| 1   | Mg-ATP                               | 167 ns          | 3                     |
| 2   | Mg-ATP, K <sup>+</sup>               | 167 ns          | 3                     |
| 3   | Mg-ATP, Na <sup>+</sup>              | 167 ns          | 3                     |
| 4   | Mg-ATP, NH <sub>4</sub> <sup>+</sup> | 167 ns          | 3                     |
| 5   | Mg-ATP                               | 20 ns           | 25                    |
| 6   | Mg-ATP, K <sup>+</sup>               | 20 ns           | 25                    |
| 7   | Mg-ATP, Na <sup>+</sup>              | 20 ns           | 25                    |
| 8   | Mg-ATP, NH <sub>4</sub> <sup>+</sup> | 20 ns           | 25                    |

**Table S4. Values of dihedral angles of the phosphate chains of Mg-ATP in the presence of K<sup>+</sup> ions.**

| Structure                                 | $\Psi^{\alpha-\beta}$ | $\Psi^{\beta-\gamma}$ | $\Psi^{\alpha-\gamma}$ |
|-------------------------------------------|-----------------------|-----------------------|------------------------|
| Mg-ATP<br>(MD simulation)                 | +69±31°               | +10±25°               | N/A*                   |
| Mg-ATP-K <sup>+</sup><br>(MD simulation)  | +23±40°               | -4±18°                | +9±65°                 |
| Mg-ATP-2K <sup>+</sup><br>(MD simulation) | +13±24°               | -27±8°                | +1±26°                 |

Dihedral angle is an angle between two planes that is defined by four atoms. Values of dihedral angles between phosphate groups were defined as follows:  $\Psi^{\alpha-\beta} = \angle O^{2A}-P^A-P^B-O^{2B}$ ;  $\Psi^{\beta-\gamma} = \angle O^{1B}-P^B-P^G-O^{1G}$ ; and  $\Psi^{\alpha-\gamma} = \angle O^{1A}-P^A-P^G-O^{3G}$ , see also Fig. S3. During the analysis of MD simulation data, the average and standard deviation values for dihedral angles were obtained by fitting the angle distribution histograms with normal functions, using the MatLab function “fit”. All distributions were fitted with one-term Gaussian models, except for the  $\Psi^{\beta-\gamma}$  angle in case of the Mg-ATP with two K<sup>+</sup> bound; this distribution was fitted with a two-term Gaussian, and parameters are shown for the highest peak. Distribution histograms and fitted curves are shown in Figure S3.

\* The rotation of  $\alpha$ -phosphate is unrestricted and the corresponding dihedral angles can take any values between -180° and 180°.

**Table S5. Lifetimes of the  $\beta\gamma$ -conformation of  $\text{Mg}^+\text{ATP}$  complex during MD simulations.**

| Cation                                                | $\text{K}^+$ | $\text{Na}^+$ | $\text{NH}_4^+$ | no $\text{M}^+$ |
|-------------------------------------------------------|--------------|---------------|-----------------|-----------------|
| Average lifetime (ns)                                 | 9.49         | 10.59         | 11.04           | 9.45            |
| Standard deviation                                    | 6.52         | 8.28          | 7.82            | 7.85            |
| Lifetime (ns) for each MD run (total run time, 20 ns) | 7.68         | 13.18         | 0.88            | 0.91            |
|                                                       | 16.16        | 0.15          | 19.75           | 3.43            |
|                                                       | 16.8         | 1.18          | 19.55           | 0.61            |
|                                                       | 7.93         | 11.8          | 8.48            | 14.73           |
|                                                       | 4.93         | 4.03          | 2.71            | <b>20</b>       |
|                                                       | 0.28         | <b>20</b>     | 2.21            | 12.38           |
|                                                       | 6.06         | <b>20</b>     | 1.58            | <b>20</b>       |
|                                                       | 2.75         | 7.01          | 12.8            | 19.23           |
|                                                       | 11.76        | 3.86          | 10.71           | 0.26            |
|                                                       | 6.33         | 20            | 2.65            | 0.93            |
|                                                       | 13.43        | 2.36          | <b>20</b>       | <b>20</b>       |
|                                                       | 2.65         | 20            | 16.98           | 6.2             |
|                                                       | 8.11         | <b>20</b>     | 17.66           | 0.21            |
|                                                       | 11.21        | 20            | 9.16            | 10.58           |
|                                                       | 4.9          | <b>20</b>     | <b>20</b>       | 3.03            |
|                                                       | 8.03         | 16.41         | 1.18            | 13.38           |
|                                                       | 0.7          | 3.15          | 1.21            | 1.03            |
|                                                       | 14.68        | 2.25          | 1.06            | 5.31            |
|                                                       | <b>20</b>    | 10.93         | 8.36            | 0.36            |
|                                                       | <b>20</b>    | 0.18          | <b>20</b>       | 9.11            |
|                                                       | 0.38         | 6.83          | 5.63            | <b>20</b>       |
|                                                       | 4.68         | <b>20</b>     | <b>20</b>       | 6.2             |
|                                                       | 8.01         | 0.66          | 20              | 8.48            |
|                                                       | <b>19.75</b> | 0.83          | 13.38           | 20              |
|                                                       | <b>20</b>    | 20            | 20              | 20              |

For each system, 25 independent 20-ns MD simulation runs were conducted, each starting with the  $\text{Mg-ATP}$  complex in the  $\beta\gamma$  conformation. Stability of the  $\beta\gamma$  conformation was tracked by measuring the distance from the  $\text{Mg}^{2+}$  ion to the nearest oxygen atom of  $\alpha$ -phosphate, and the time periods during which the  $\beta\gamma$  conformation was retained were compared between different systems. The one-way ANOVA analysis did not reveal any significant dependence of the stability of the  $\beta\gamma$ -coordination on the monovalent cation present. For each monovalent cation, the  $\beta\gamma$ -coordination was retained during the whole 20 ns in at least four cases (shown by bold numbers). These simulations were used to characterize the shape of the phosphate chain of ATP with  $\beta\gamma$ -coordination of the  $\text{Mg}^{2+}$  ion (Table 1 and Figure 5B).

A. Atom naming scheme

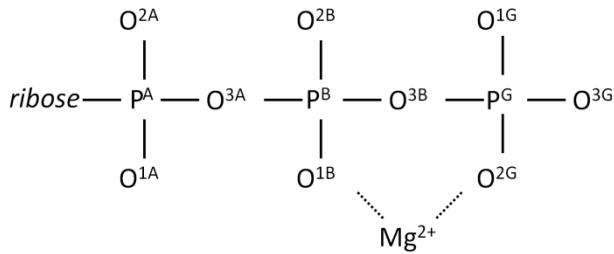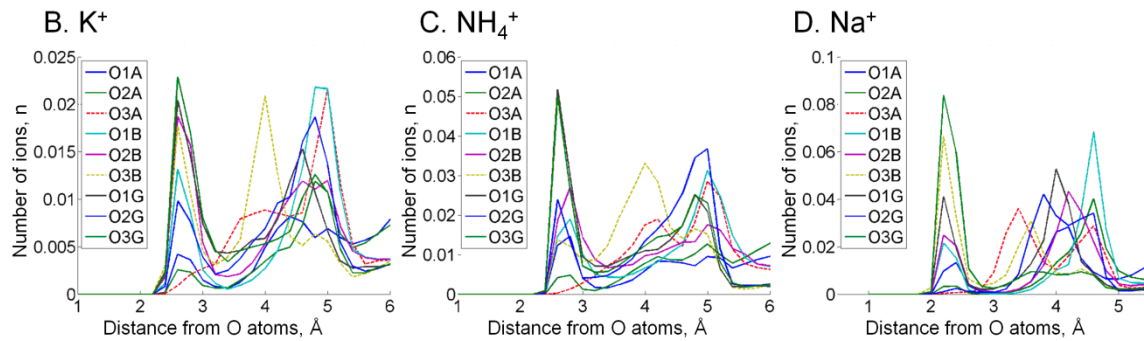

**Figure S1. Radial distribution of cations in the proximity of each oxygen atom.** Radial distributions are shown for all atoms of the ATP phosphate chain. A. Atom names according to the CHARMM naming scheme (31) and proposals in ref. (32). B. Radial distributions of cations around individual oxygen atoms. The distributions of cations around ester bond oxygen atoms O<sup>3A</sup> and O<sup>3B</sup> are shown by dashed lines. The peak distances from the cation to the oxygen atoms were the same 2.7 Å for K<sup>+</sup> and NH<sub>4</sub><sup>+</sup> ions, while for Na<sup>+</sup> this distance was 2.2 Å. For the NH<sub>4</sub><sup>+</sup> ion, the distance was measured from each oxygen atom to the nitrogen atom of NH<sub>4</sub><sup>+</sup>. There are two ester bond oxygens in the phosphate chain, but only the oxygen (O<sup>3B</sup>) that connects β- and γ-phosphates was seen involved in the cation binding, it interacted more often with K<sup>+</sup> and Na<sup>+</sup> than with NH<sub>4</sub><sup>+</sup>. Monovalent cations were found near oxygen atoms of γ-phosphate more often than near oxygens of β- and α-phosphates.

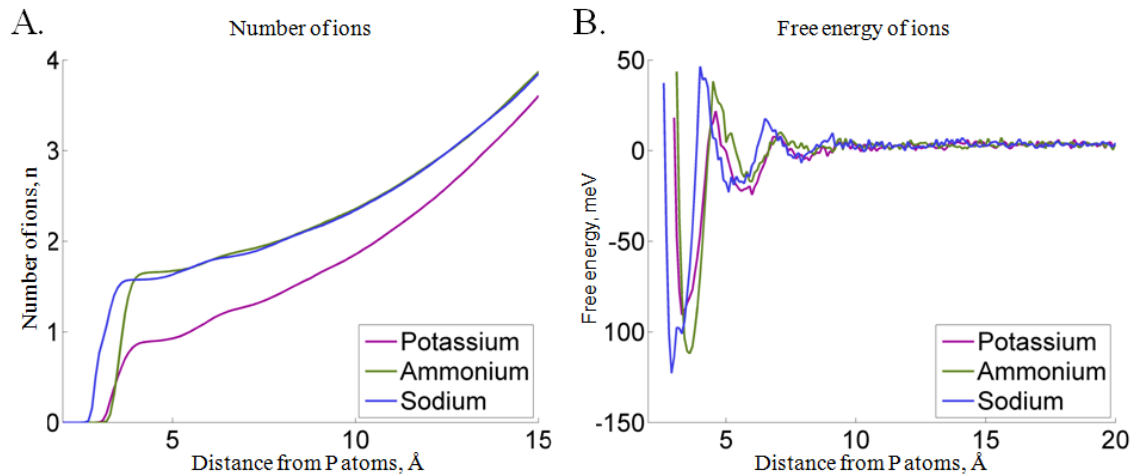

**Figure S2. Properties of cation binding to the ATP as derived from MD simulations.**

A. Probability distribution functions for cations around the phosphate chain. We have plotted the number of atoms inside the area centered on phosphorus atoms of the ATP phosphate chain as a function of the radius of the selected area. This number was estimated by measuring the distance between each cation in the system and the nearest phosphorus atom of ATP during MD simulations. The plot indicates the presence of 1.5 cations on average in the 4 Å radius around the phosphate chain in the case of  $\text{Na}^+$  and  $\text{NH}_4^+$ , and 0.75 ions on average in the case of  $\text{K}^+$ . For all three ions, the first inflection occurs at the distances shorter than 4 Å and a less prominent second inflection can be seen at around 6 Å.

B. Free energy of the cation binding as a function of the distance from the phosphate chain, as estimated from the probability data in Fig. S2A. In addition to the two binding sites at the distances of approx. 4 Å and 6 Å, the free energy plot revealed a less pronounced third binding site at a distance of approx. 8-9 Å from the phosphorus atoms. The most prominent is the first peak, corresponding to cation binding around the phosphate chain, within the 4 Å distance of at least one of the phosphorus atoms, so further focus was specifically on cation binding around the phosphate chain.

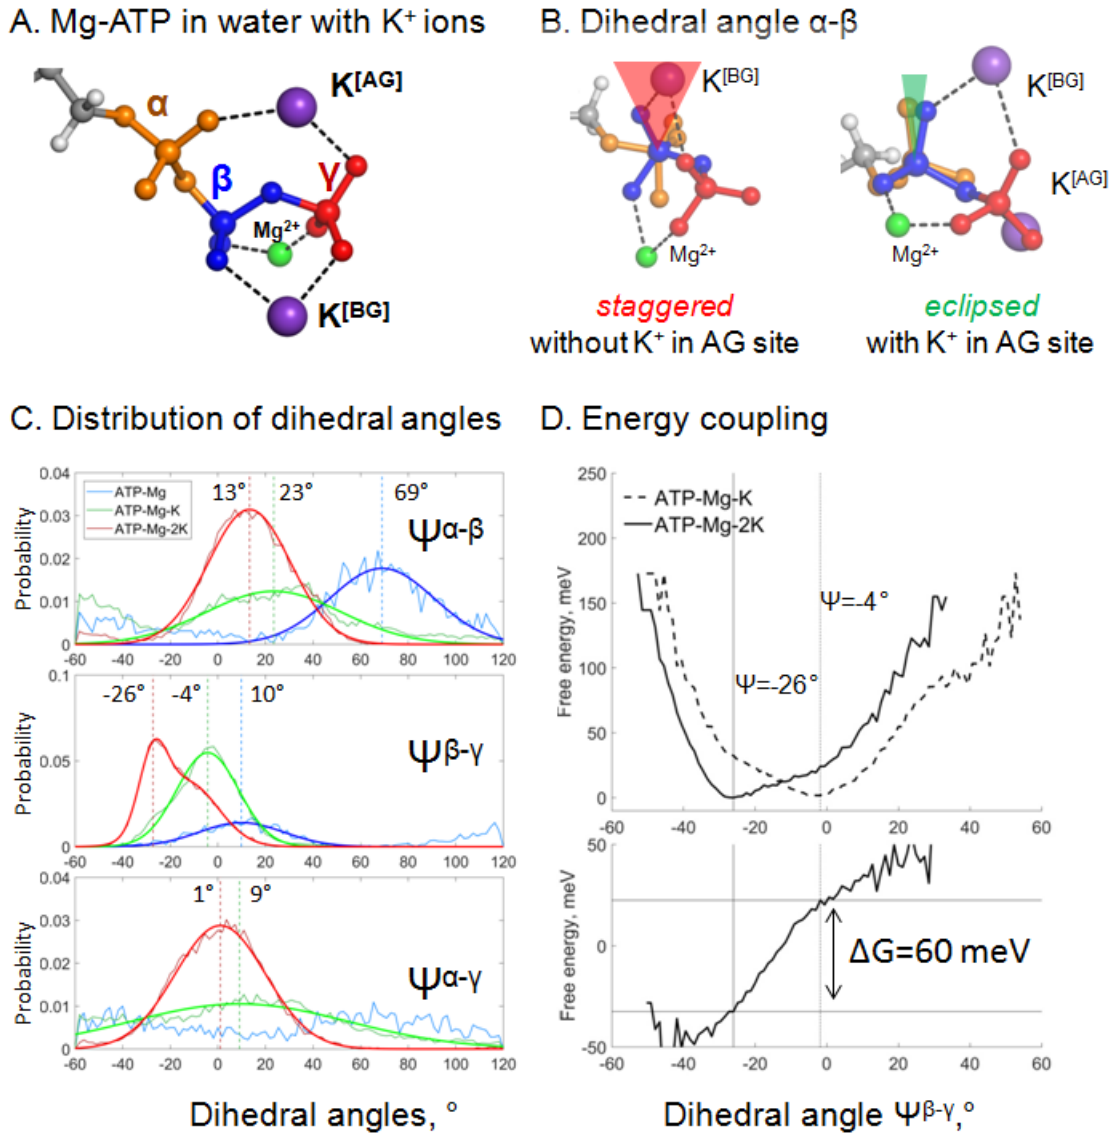

**Figure S3. Cation binding induces eclipsed conformation of the phosphate chain.**

**A, B.** Mg-ATP complexes with K<sup>+</sup> ions bound in the AG and BG sites;  $\alpha$ -phosphate is shown in orange,  $\beta$ -phosphate in blue,  $\gamma$ -phosphate in red. **B.** Relative positions of  $\alpha$ - and  $\beta$ -phosphates with and without K<sup>+</sup> ion in the AG site; the  $\alpha$ -phosphate is in the back,  $\beta$ - and  $\gamma$ -phosphates are in front.

**C.** Distribution histograms for dihedral angles between phosphate groups in ATP, calculated from MD simulations of Mg-ATP in the absence of additional cations (blue), with one K<sup>+</sup> cation bound in the BG site (green) and with two cations bound in the AG and BG sites (red). Normalized histograms of dihedral angle distribution (thin lines) were calculated from MD



trajectories and fitted with normal distribution function (thick lines). Dashed lines indicate the centroid values of the fits by Gaussian function. All distributions were fitted with one-term Gaussian models, except for the  $\Psi^{\beta-\gamma}$  angle in case of Mg-ATP with two cations bound, this distribution was fitted with a two-term Gaussian, parameters for the highest peak are shown.

**D. Coupling between cation binding in the AG site and rotation of  $\gamma$ -phosphate relative to  $\alpha$ - and  $\beta$ -phosphates.** Data from 10-ns MD simulations with restraints on the positions of  $K^+$  ions (see the text). The top graph shows free energy calculated from normalized probabilities of ATP conformations and plotted as function of the dihedral angle between  $\gamma$ - and  $\beta$ -phosphates. The bottom plot displays free energy of coupling the binding of the second  $K^+$  ion with the  $\gamma$ -phosphate rotation, calculated as the difference between the free energy plots shown on the top graph. The lowest energy value was set to zero. These plots show that the presence of second  $K^+$  ion in the AG site induces a near-eclipsed state of the phosphate chain, by bringing both  $\Psi^{\alpha-\beta}$  and  $\Psi^{\alpha-\gamma}$  angles close to  $0^\circ$ , at the expense of  $\Psi^{\beta-\gamma}$ , which increases slightly (see Table S4). Binding of the second  $K^+$  ion in the AG site stabilizes this almost eclipsed state by  $\sim 60$  meV.

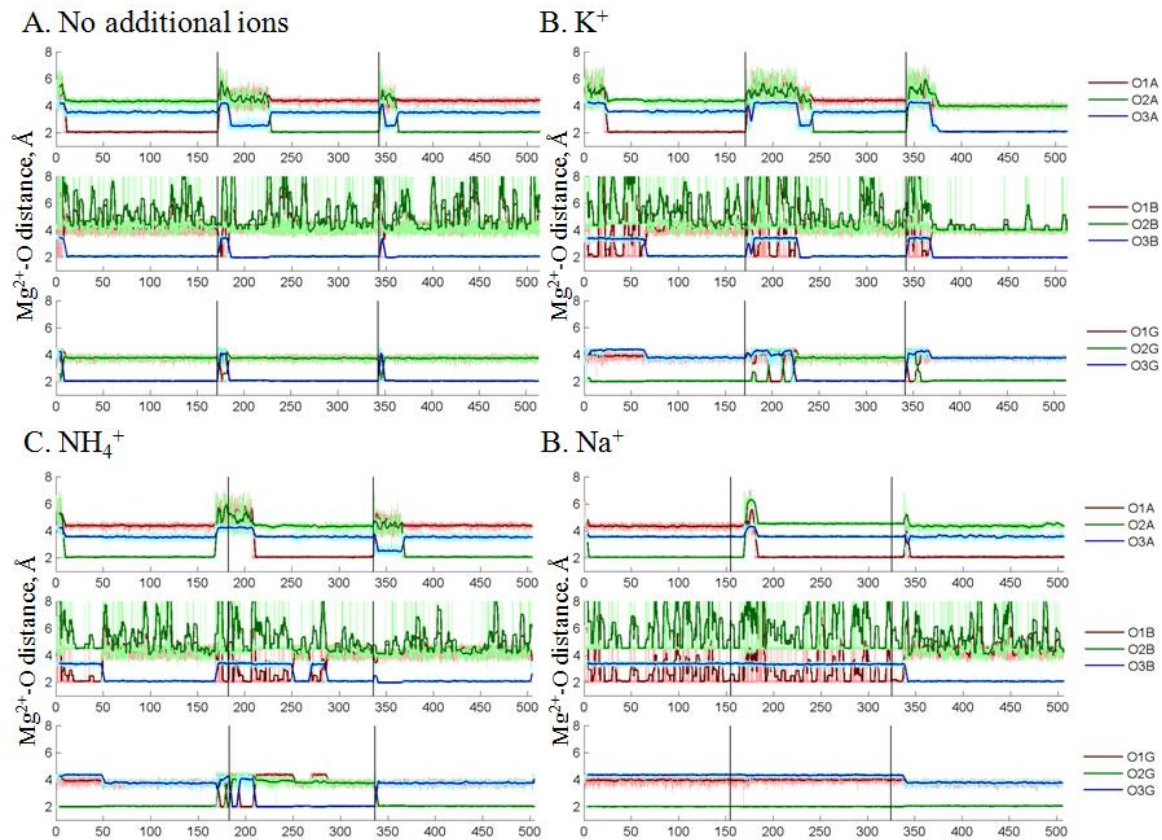

**Figure S4. Coordination of the  $Mg^{2+}$  ion by the oxygen atoms of the ATP phosphate chain during MD simulations.** Black vertical lines indicate borders between independent simulations, thick colored lines show moving average of distances measured during MD. Oxygen atoms are labelled as in Fig. S1A. The most populated conformation in each of four systems is characterized by the  $Mg^{2+}$  ion coordinated by 3 oxygen atoms: one of the free oxygens of  $\alpha$ -phosphate ( $O^{1A}$  or  $O^{2A}$ ),  $O^{3B}$  atom, and an oxygen atom from  $\gamma$ -phosphate ( $O^{1G}$ ,  $O^{2G}$ , or  $O^{3G}$ ). This conformation resembles the  $\alpha\beta\gamma$  conformation of the Mg-ATP complex seen in other studies, but differs in the inclusion of an ester oxygen atom in the  $Mg^{2+}$  coordination sphere.

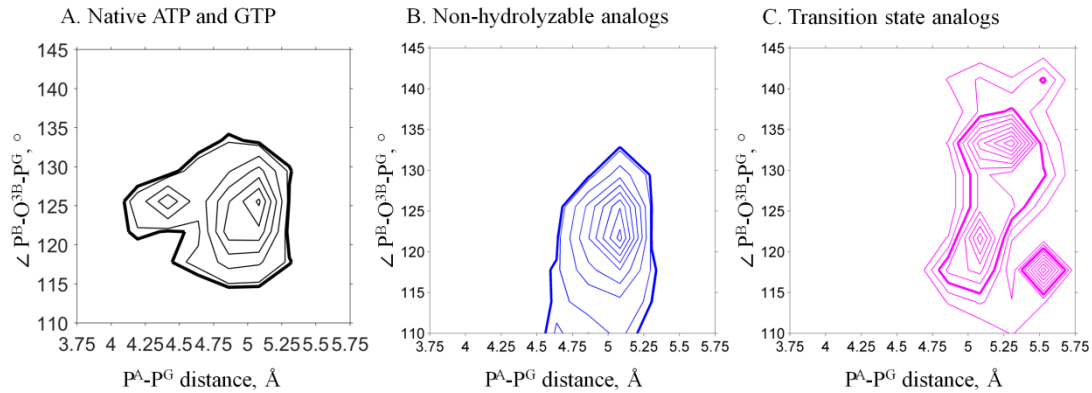

**Figure S5. Phosphate chain shape of ATP and GTP analogs in the X-ray structures of P-loop NTPases.** PDB entries for structures of P-loop NTPases were extracted from InterPro database entry IPR027417 “P-loop containing nucleoside triphosphate hydrolase” and filtered to contain only those X-ray structures that contain  $\text{Mg}^{2+}$  ions, resulting in a list of 1,333 PDB IDs. Selected structures were analyzed with custom MatLab scripts to select only those structures which contain either an NTP molecule, or its non-hydrolyzable analog, or a transition state analog. Additionally, we only considered NTP-like molecules bound in the proximity of at least one Lys residue (with less than 4.5 Å distance from NZ atom of Lys to any of the phosphate chain P atoms or the corresponding atoms in mimicking groups). In total, 1,357 NTP-like molecules from 670 PDB entries were used in the measurements. Isotherms for the heat map of the structure shape distribution are shown to indicate the most and least populated areas. Bold lines indicate isotherms chosen to represent crystallographic data in comparison with the MD results.

**A.** Shapes of ATP and GTP molecules. Native ATP and GTP molecules are most likely to be crystallized with inactive proteins, so the majority of them represent non-productive conformations of the phosphate chain.

**B.** Shapes of non-hydrolyzable analogs (PDB IDs: ANP, GNP, ACP, GCP, AGS, GSP). Non-hydrolyzable analogs cover lower values of the angle that is analogous to the  $\text{P}^{\text{B}}-\text{O}^{\text{3B}}-\text{P}^{\text{G}}$  angle, since in such molecules, the ester oxygen between  $\text{P}^{\text{B}}$  and  $\text{P}^{\text{G}}$  is replaced with another atom (N in ANP, GNP; C in ACP, GCP); or one of free oxygens of  $\gamma$ -phosphate is replaced with S (GSP, AGS).

**C.** Shapes of the transition state analogs (ADP or GDP in complex with  $\text{AlF}_3/\text{AlF}_4^-$ ,  $\text{VO}_4^{3-}$ , or  $\text{BeF}_3/\text{BeF}_4^-$ ). ADP- $\text{BeF}_x$  complexes can attain the shape of the transition state or the ground state,

depending on the geometry of the active site (33). We included this complex into the group of transition state analogs with chemically similar structures. Transition state analogs represent a variety of conformations from hydrolysis-prone conformations of the substrate, via conformations that correspond to different steps of hydrolysis, to the conformations that correspond to the separated reaction products. In the latter case, the distance between  $P^A$  and  $P^G$ , exceeds  $5.5\text{\AA}$ , indicating complete separation of the  $\gamma$ -phosphate-mimicking group from ADP/GDP; whereas the " $P^B$ - $O^{3B}$ - $P^G$ " angle decreases due to the displacement of the former ester oxygen atom that becomes the free terminal oxygen of  $\beta$ -phosphate. For comparison with the MD data, we only considered the major cluster of true transition state-like conformations.

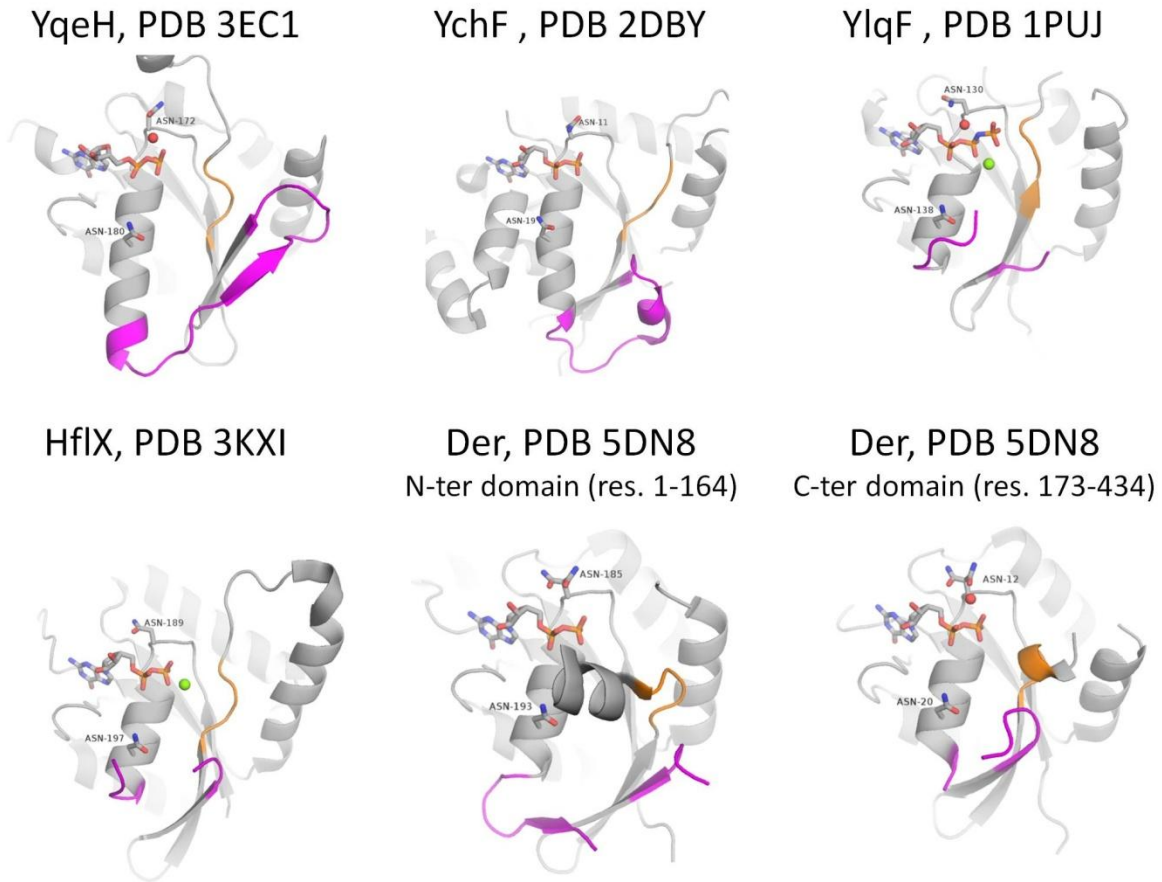

**Figure S6. Active sites of P-loop NTPases with established  $K^+$ -dependent activity** (see Table S1 for the full list and references). Each of the proteins shown has both Asn residues that were shown to be associated with binding of monovalent cations in related proteins (34). Switch I, including the K-loop, and its flanking regions are shown in magenta, switch II motif DxxG is shown in orange. NTP-like molecules are shown as sticks,  $Mg^{2+}$  ions are shown as green spheres, water molecules in the area of supposed cation binding are shown as red spheres.

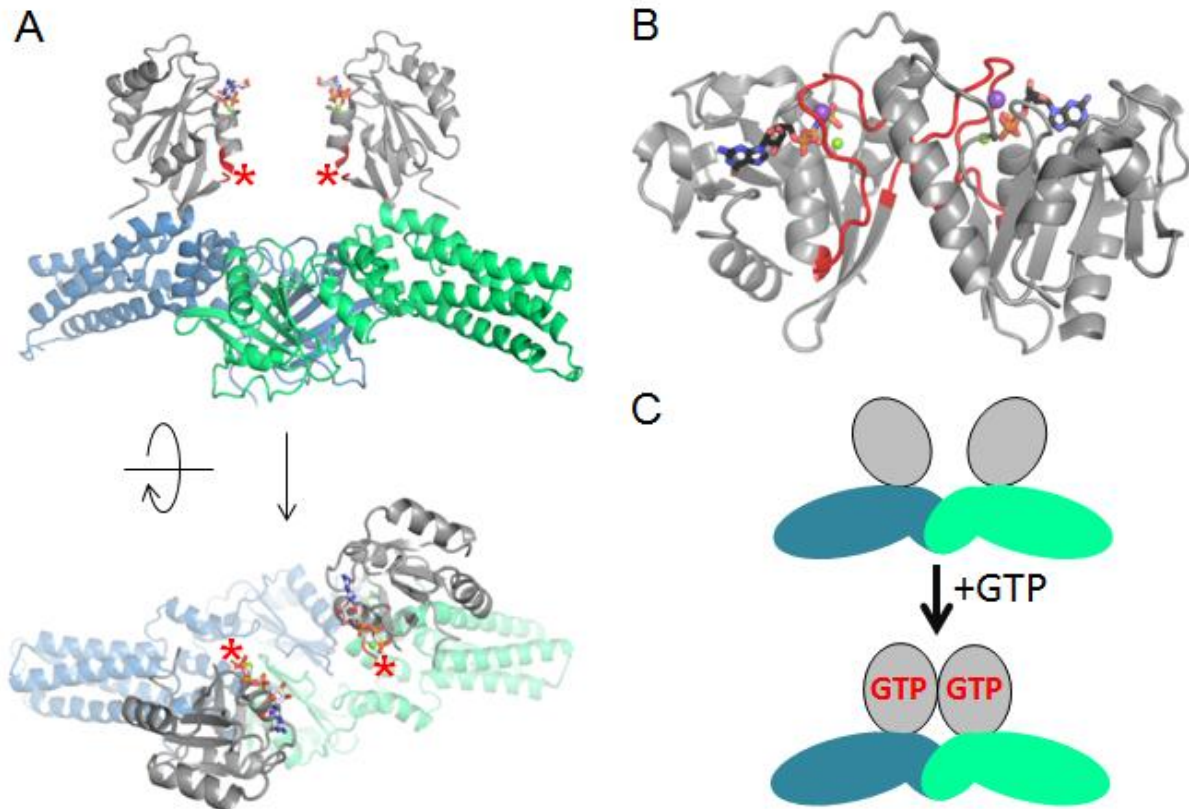

**Figure S7. Activation of the MnmE GTPase upon dimerization.**

**A.** Inactive dimer of the full-length MnmE in the GTP-bound form (the structure (PDB: 3GEI) was resolved with non-hydrolyzable GTP analogs). The P-loop domain is shown in grey, the K-loop is not resolved (its position is indicated by red asterisks), the N-terminal and helical domains are shown in blue and green for different monomers.

**B.** An active dimer of isolated G-domains of MnmE, as resolved in complex with a transition state analog and K<sup>+</sup> ion (PDB: 2GJ8). The K-loops are shown in red, K<sup>+</sup> ions are shown as purple spheres.

**C.** Schematic representation of the conformational changes in MnmE dimers, reproduced after (35), domains are colored the same way as on panel A.

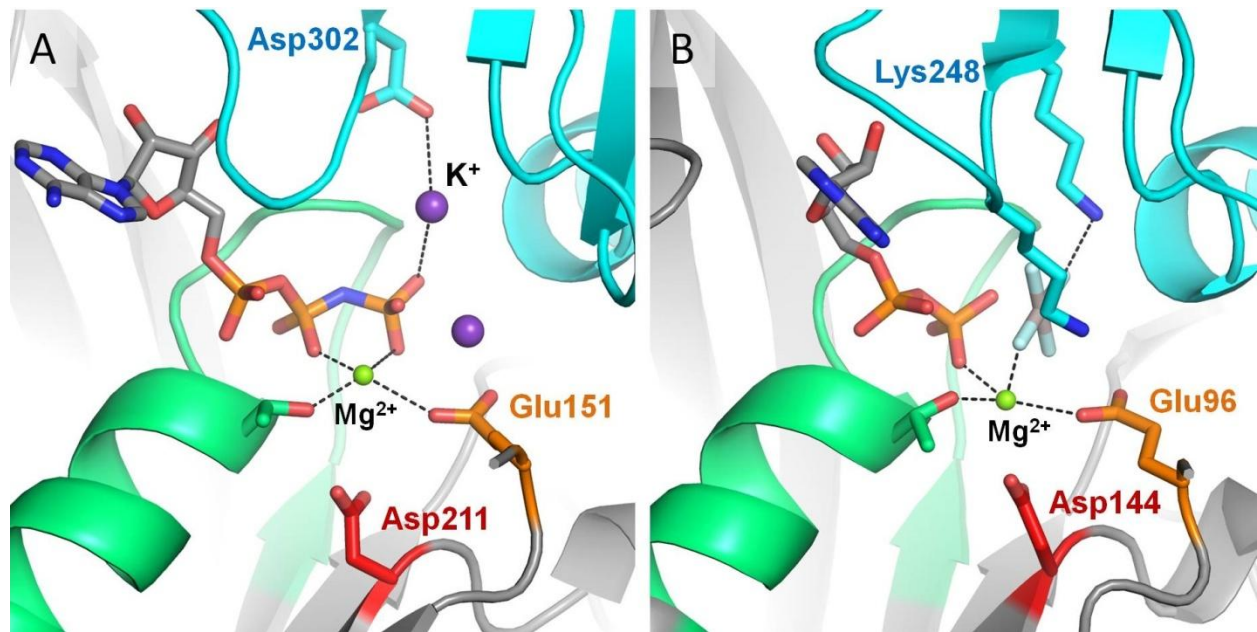

**Figure S8. Positively charged moieties in the active site of RecA-like recombinases.**

**A.** Cation-dependent RadA recombinase from *Methanococcus voltae* [PDB: 2F1H] (36).

**B.** Cation-independent RecA recombinase from *E. coli* [PDB: 3CMX] (37). The protein structure is shown as grey cartoon, the adjacent monomer is shown in blue, the P-loop region is shown in green; catalytic Glu residues are shown as orange sticks, conserved Asp residues of the Walker B motif are shown as red sticks. Functionally relevant residues from adjacent monomers are shown as blue sticks.  $Mg^{2+}$  ions are shown as green spheres,  $K^+$  ions as purple spheres.

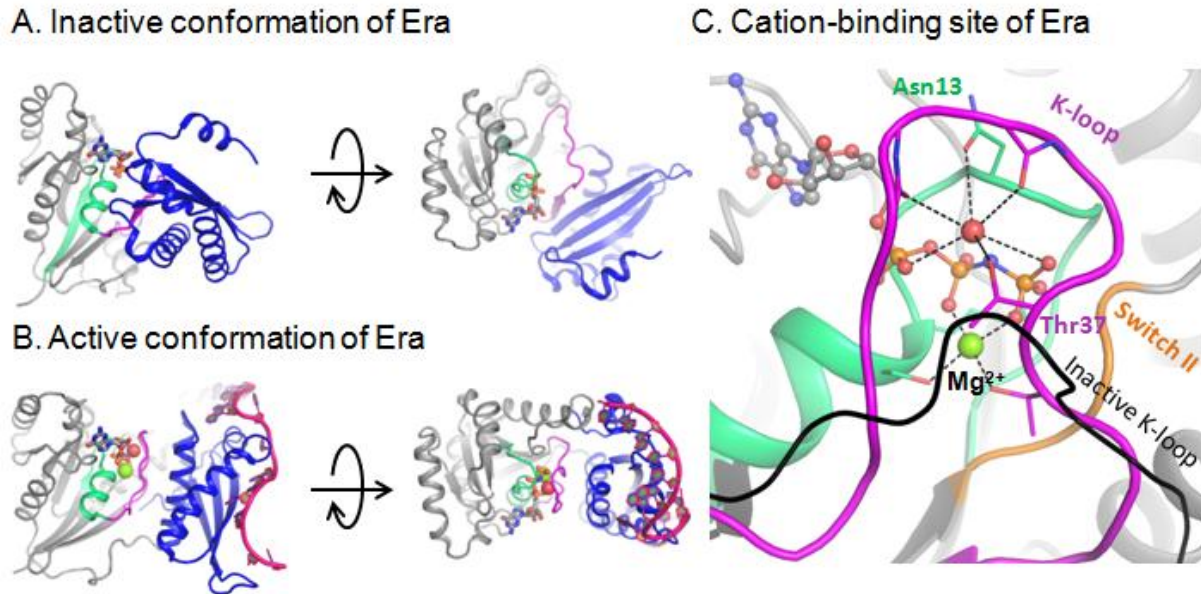

**Figure S9. Activation of the GTPase Era upon RNA binding.**

**A.** Inactive Era in the GDP-bound form [PDB: 3IEU] (38) in two projections.

**B.** Active Era in complex with nucleotides 1506-1542 of 16S rRNA and a non-hydrolyzable analog of GTP [PDB: 3R9W] (39) in two projections.

**C.** Cation-binding site of active Era, occupied by a water molecule (shown as a red sphere) [PDB: 3R9W] (39). The black line indicates, for comparison, the position of the K-loop in the inactive structure [PDB: 3IEU] (38). The P-loop domain is shown in grey, the P-loop region shown in green, the K-loop region shown in magenta, nucleotide analogs are shown as sticks, Mg<sup>2+</sup> ions are shown as green spheres.



## Statistical Analysis

To analyze conformations of Mg-ATP complexes in the presence of different cations, we selected MD simulation fragments of similar length with the same type of interaction between the Mg<sup>2+</sup> ion and the triphosphate chain. In each case ~160 ns of MD simulation were taken to characterize a particular Mg-ATP conformation; if needed, results of several independent simulations were merged to collect enough data, see Fig. S10A, B and S11A, B for examples. For the MD simulation data, we calculated autocorrelation functions (Fig. S10C and S11C). Given the correlation times obtained, independent frames were extracted to calculate characteristic values for the separate conformations of ATP. For the systems without additional monovalent cations, every N-th frame was taken for the calculation, with N defined by the correlation time. For the systems with monovalent cations, only frames in which at least 1 monovalent cation was bound to the phosphate chain were taken, with at least N frames between measurements. A monovalent cation was considered to be bound when it was within a binding distance from at least one oxygen atom of the phosphate chain, with binding distances defined as follows: 2.4 Å for Na<sup>+</sup> and 3.2Å for K<sup>+</sup> and NH<sub>4</sub><sup>+</sup>.

A. No additional cations,  $\beta\gamma$  conformation

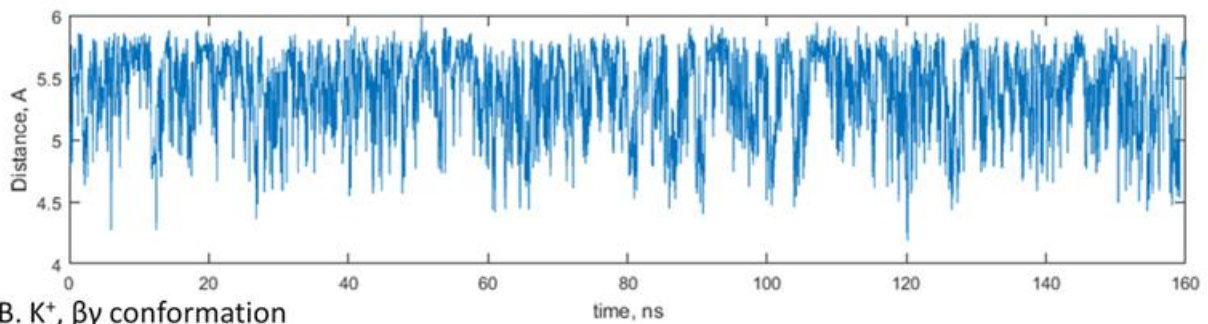

B.  $K^+$ ,  $\beta\gamma$  conformation

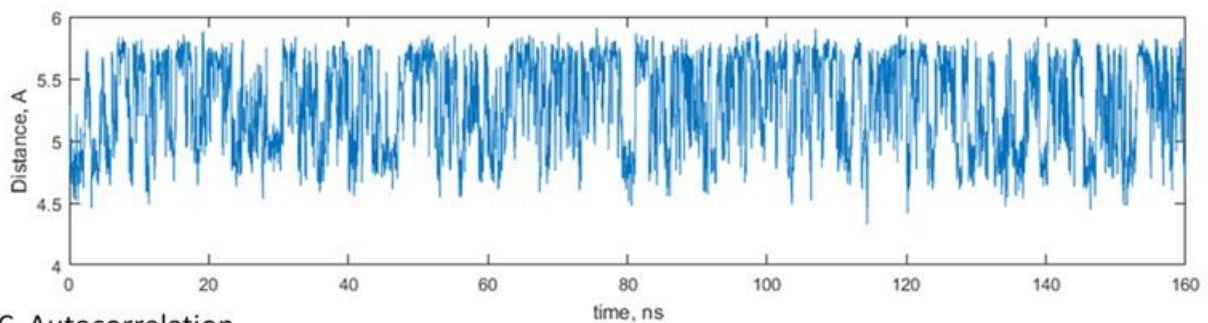

C. Autocorrelation

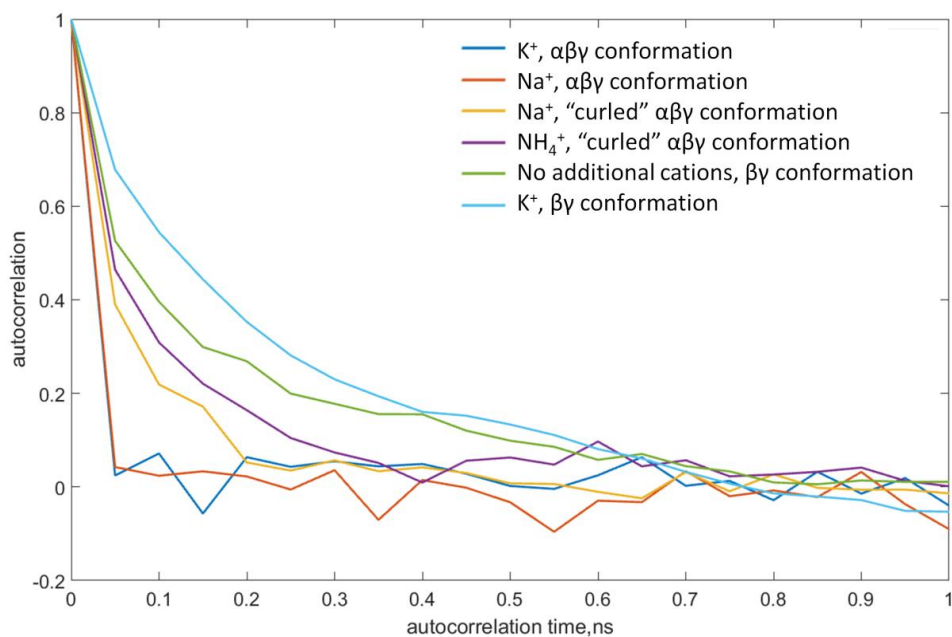

**Figure S10.** Estimation of correlation times for the  $P\alpha$ - $P\gamma$  distances. A,B, Changes of the distance value upon MD simulations of of  $\beta\gamma$ -coordinated  $Mg$ -ATP complexes with no additional monovalent cations (A) and with  $K^+$  ions (B) provided as examples; C, Autocorrelation values plotted as functions of the time lag. Based on this plot, the correlation time of 1 ns of simulation time was anticipated for the all types of interaction between the  $Mg^{2+}$  ion and the triphosphate chain and in the presence of all tested  $M^+$  ions.

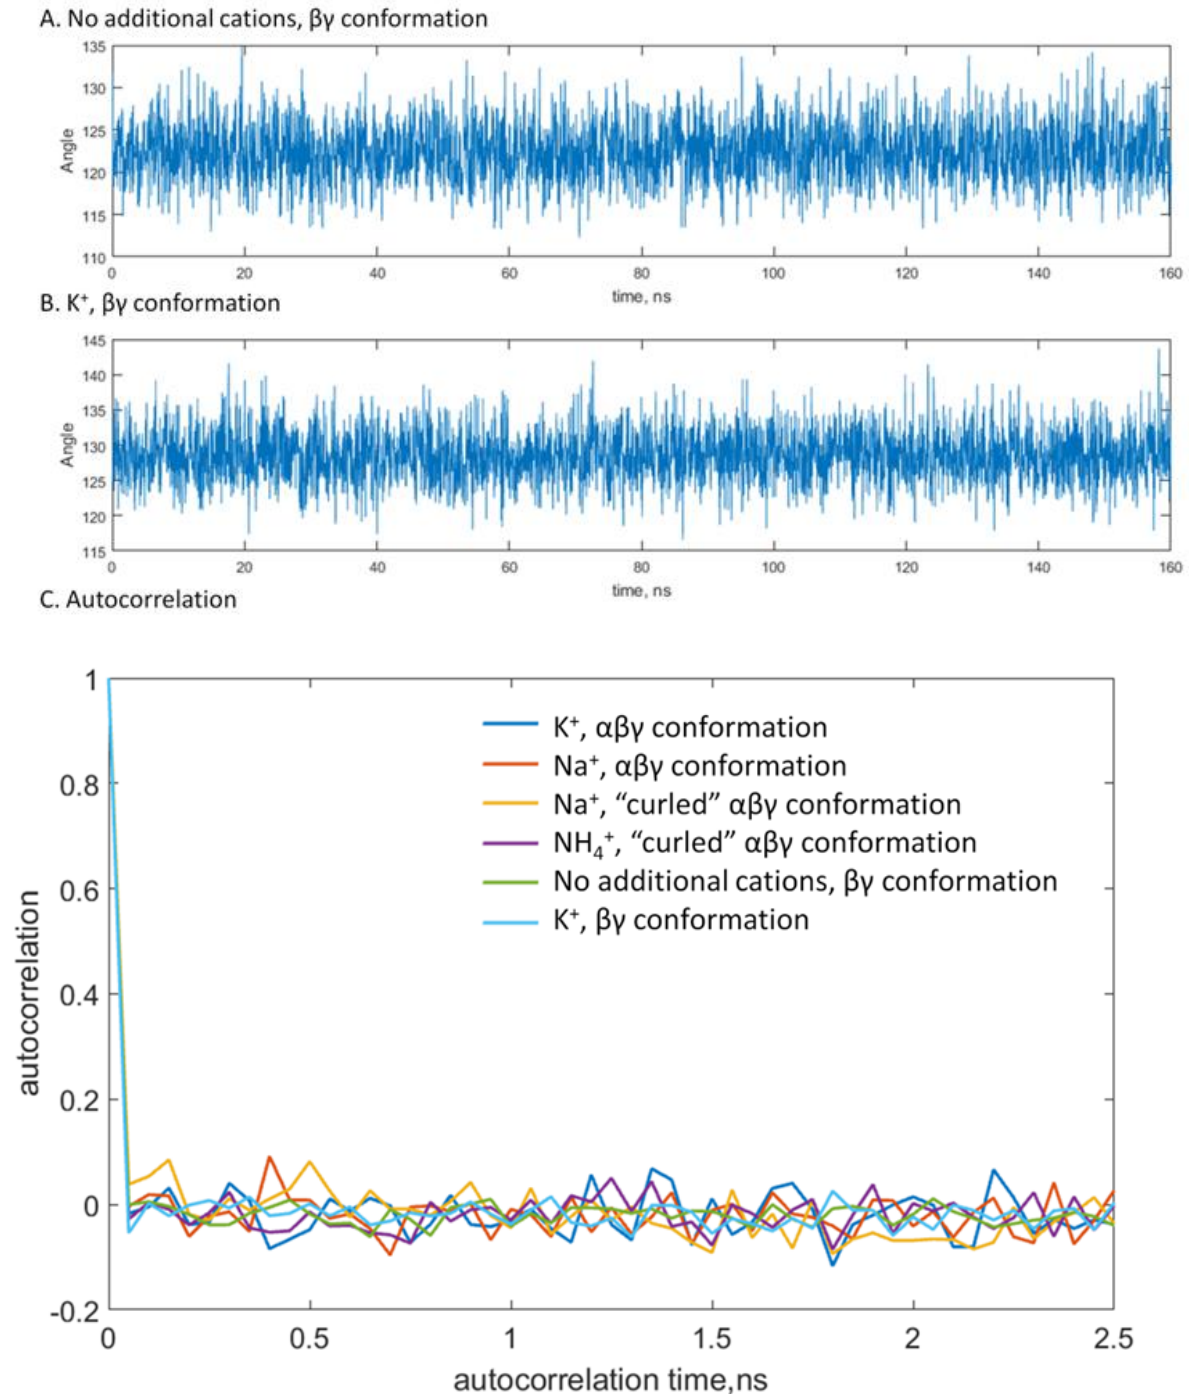

**Figure S11.** Estimation of correlation times for the  $P\beta$ -O- $P\gamma$  angles. A, B, Changes of the angle value upon MD simulations of  $\beta\gamma$ -coordinated Mg-ATP complexes with no additional monovalent cations (A) and with  $K^+$  ions (B) provided as examples. C, Autocorrelation values plotted as functions of the time lag. As compared to the distance measurements, the angle values oscillated on a much shorter timescale and accordingly had shorter correlation times. From this plot, the correlation time of 5 frames or 250 ps of simulation time was estimated. The general shape of the autocorrelation function was the same for all types of interaction between the  $Mg^{2+}$  ion and the triphosphate chain and in the presence of all tested  $M^+$  ions.

To compare conformations of Mg-ATP, as obtained upon MDsimulations with different

monovalent cations, we used the two-sample t-test. We used the assumption that the two

compared data samples were from populations with equal variances; the test statistics under

the null hypothesis had Student's t distribution with  $n+m-2$  degrees of freedom, where  $n$  and

$m$  were sample sizes, and the sample standard deviations were replaced by the pooled

standard deviation. In each case the null hypothesis was that the data in the two samples come

from independent random samples with normal distributions with equal mean values and

equal but unknown variances. The alternative hypothesis was that the data in the two samples

come from populations with unequal mean values. The test rejects the null hypothesis at the

5% significance level. Here we compare the test results and particular P-values obtained for

all pairwise comparisons conducted in this study.

**Table S6.** Characteristics of the triphosphate chain for different interactions between the  $Mg^{2+}$  ion and ATP.

| System                       | Conformation                     | P $\alpha$ -P $\gamma$ distance, Å | Number of frames | P $\beta$ -O-P $\gamma$ angle, ° | Number of frames |
|------------------------------|----------------------------------|------------------------------------|------------------|----------------------------------|------------------|
| No cations                   | $\beta\gamma$ conformation       | 5.4±0.3                            | 160              | 122.4±3.5                        | 640              |
| K <sup>+</sup>               | $\beta\gamma$ conformation       | 4.9±0.2                            | 85               | 128.4±3.5                        | 388              |
| Na <sup>+</sup>              | $\beta\gamma$ conformation       | 4.8±0.1                            | 109              | 128.2±3.5                        | 473              |
| NH <sub>4</sub> <sup>+</sup> | $\beta\gamma$ conformation       | 4.9±0.2                            | 64               | 128.6±3.8                        | 251              |
| No cations                   | $\alpha\beta\gamma$ conformation | 4.7±0.2                            | 161              | 125.2±3.3                        | 267              |
| K <sup>+</sup>               | $\alpha\beta\gamma$ conformation | 4.3±0.1                            | 133              | 127.9±3.6                        | 198              |
| Na <sup>+</sup>              | $\alpha\beta\gamma$ conformation | 4.2±0.1                            | 129              | 127.9±3.8                        | 192              |
| NH <sub>4</sub> <sup>+</sup> | $\alpha\beta\gamma$ conformation | 4.2±0.1                            | 129              | 128.1±3.7                        | 190              |
| Na <sup>+</sup>              | “curled” conformation            | 4.6±0.2                            | 131              | 124.3±3.2                        | 194              |
| NH <sub>4</sub> <sup>+</sup> | “curled” conformation            | 4.6±0.2                            | 125              | 124.9±3.5                        | 183              |

**Table S7.** Comparison of the P $\alpha$ -P $\gamma$  distance measurements of the  $\beta\gamma$ -coordinated Mg-ATP complexes

| System<br>(number of frames)         | No M <sup>+</sup> ions | K <sup>+</sup>    | Na <sup>+</sup>   | NH <sub>4</sub> <sup>+</sup> |
|--------------------------------------|------------------------|-------------------|-------------------|------------------------------|
| No M <sup>+</sup> ions<br>(160)      | N/A                    | 10 <sup>-25</sup> | 10 <sup>-46</sup> | 10 <sup>-24</sup>            |
| K <sup>+</sup><br>(85)               | 10 <sup>-25</sup>      | N/A               | 10 <sup>-7</sup>  | 0.16*                        |
| Na <sup>+</sup><br>(109)             | 10 <sup>-46</sup>      | 10 <sup>-7</sup>  | N/A               | 0.0041                       |
| NH <sub>4</sub> <sup>+</sup><br>(64) | 10 <sup>-24</sup>      | 0.16*             | 0.0041            | N/A                          |

The null hypothesis was that the P $\alpha$ -P $\gamma$  distances in the  $\beta\gamma$ -coordinated Mg-ATP systems with different M<sup>+</sup> ions added result from normal distributions with equal mean values.

\* The null hypothesis is NOT rejected, no significant difference between samples

**Table S8.** Comparison of the P $\alpha$ -P $\gamma$  distance measurements of the  $\alpha\beta\gamma$ -coordinated Mg-ATP complexes

| System<br>(number of frames)          | No M <sup>+</sup><br>ions | K <sup>+</sup>    | Na <sup>+</sup>   | NH <sub>4</sub> <sup>+</sup> |
|---------------------------------------|---------------------------|-------------------|-------------------|------------------------------|
| No M <sup>+</sup> ions<br>(161)       | N/A                       | 10 <sup>-56</sup> | 10 <sup>-78</sup> | 10 <sup>-76</sup>            |
| K <sup>+</sup><br>(133)               | 10 <sup>-56</sup>         | N/A               | 10 <sup>-18</sup> | 10 <sup>-11</sup>            |
| Na <sup>+</sup><br>(129)              | 10 <sup>-78</sup>         | 10 <sup>-18</sup> | N/A               | 10 <sup>-4</sup>             |
| NH <sub>4</sub> <sup>+</sup><br>(129) | 10 <sup>-76</sup>         | 10 <sup>-11</sup> | 10 <sup>-4</sup>  | N/A                          |

The null hypothesis was that the P $\alpha$ -P $\gamma$  distances in the  $\alpha\beta\gamma$ -coordinated Mg-ATP systems with different cations added result from normal distributions with equal mean values.

**Table S9.** Comparison of the P $\alpha$ -P $\gamma$  distance measurements for the  $\alpha\beta\gamma$ -coordinated and “curled”  $\beta\gamma$ -coordinated Mg-ATP complexes in different systems

| System and conformation<br>(number of frames)               | Na <sup>+</sup> ,<br>$\alpha\beta\gamma$ | Na <sup>+</sup> ,<br>“curled” | NH <sub>4</sub> <sup>+</sup> ,<br>$\alpha\beta\gamma$ | NH <sub>4</sub> <sup>+</sup> ,<br>“curled” |
|-------------------------------------------------------------|------------------------------------------|-------------------------------|-------------------------------------------------------|--------------------------------------------|
| Na <sup>+</sup> , $\alpha\beta\gamma$<br>(129)              | N/A                                      | 10 <sup>-46</sup>             | 10 <sup>-4</sup>                                      | N/A                                        |
| Na <sup>+</sup> , “curled”<br>(121)                         | 10 <sup>-46</sup>                        | N/A                           | N/A                                                   | 0.98*                                      |
| NH <sub>4</sub> <sup>+</sup> , $\alpha\beta\gamma$<br>(129) | 10 <sup>-4</sup>                         | N/A                           | N/A                                                   | 10 <sup>-42</sup>                          |
| NH <sub>4</sub> <sup>+</sup> , “curled”<br>(135)            | N/A                                      | 0.98*                         | 10 <sup>-42</sup>                                     | N/A                                        |

The null hypothesis was that the P $\alpha$ -P $\gamma$  distances in ATP are the same in the  $\alpha\beta\gamma$ -coordinated and “curled”  $\beta\gamma$ -coordinated Mg-ATP complexes, respectively.

\* The null hypothesis is NOT rejected, no significant difference between samples

**Table S10.** Comparison of the P $\beta$ -O-P $\gamma$  angle measurements for the  $\beta\gamma$ -coordinated Mg-ATP complexes

| System<br>(number of frames)          | No M <sup>+</sup><br>ions | K <sup>+</sup>     | Na <sup>+</sup>    | NH <sub>4</sub> <sup>+</sup> |
|---------------------------------------|---------------------------|--------------------|--------------------|------------------------------|
| No M <sup>+</sup> ions<br>(640)       | N/A                       | 10 <sup>-118</sup> | 10 <sup>-127</sup> | 10 <sup>-94</sup>            |
| K <sup>+</sup><br>(388)               | 10 <sup>-118</sup>        | N/A                | 0.46*              | 0.49*                        |
| Na <sup>+</sup><br>(473)              | 10 <sup>-127</sup>        | 0.46*              | N/A                | 0.17*                        |
| NH <sub>4</sub> <sup>+</sup><br>(251) | 10 <sup>-94</sup>         | 0.49*              | 0.17*              | N/A                          |

The null hypothesis was that the P $\beta$ -O-P $\gamma$  angles in the  $\beta\gamma$ -coordinated Mg-ATP complexes with different M<sup>+</sup> ions added result from normal distributions with equal mean values.

\* The null hypothesis was NOT rejected, no significant difference between samples

**Table S11.** Comparison of the P $\beta$ -O-P $\gamma$  angle measurements for the  $\alpha\beta\gamma$ -coordinated MgATP complexes

| System<br>(number of frames)          | No M <sup>+</sup><br>ions | K <sup>+</sup>    | Na <sup>+</sup>   | NH <sub>4</sub> <sup>+</sup> |
|---------------------------------------|---------------------------|-------------------|-------------------|------------------------------|
| No M <sup>+</sup> ions<br>(267)       | N/A                       | 10 <sup>-16</sup> | 10 <sup>-15</sup> | 10 <sup>-17</sup>            |
| K <sup>+</sup><br>(198)               | 10 <sup>-16</sup>         | N/A               | 0.94*             | 0.72*                        |
| Na <sup>+</sup><br>(192)              | 10 <sup>-15</sup>         | 0.94*             | N/A               | 0.68*                        |
| NH <sub>4</sub> <sup>+</sup><br>(190) | 10 <sup>-17</sup>         | 0.72*             | 0.68*             | N/A                          |

The null hypothesis was that the P $\beta$ -O-P $\gamma$  angles in the  $\alpha\beta\gamma$ -coordinated Mg-ATP complexes with different M<sup>+</sup> ions added result from normal distributions with equal mean values.

\* The null hypothesis was NOT rejected, no significant difference between samples

**Table S12.** Comparison of the P $\alpha$ -P $\gamma$  distance measurements for the  $\alpha\beta\gamma$ -coordinated and “curled”  $\beta\gamma$ -coordinated Mg-ATP complexes

| System<br>(number of frames)                                | Na <sup>+</sup> ,<br>$\alpha\beta\gamma$ | Na <sup>+</sup> ,<br>“curled” | NH <sub>4</sub> <sup>+</sup> ,<br>$\alpha\beta\gamma$ | NH <sub>4</sub> <sup>+</sup> ,<br>“curled” |
|-------------------------------------------------------------|------------------------------------------|-------------------------------|-------------------------------------------------------|--------------------------------------------|
| Na <sup>+</sup> , $\alpha\beta\gamma$<br>(192)              | N/A                                      | 10 <sup>-22</sup>             | 0.68*                                                 | N/A                                        |
| Na <sup>+</sup> , “curled”<br>(194)                         | 10 <sup>-22</sup>                        | N/A                           | N/A                                                   | 0.045                                      |
| NH <sub>4</sub> <sup>+</sup> , $\alpha\beta\gamma$<br>(190) | 0.68*                                    | N/A                           | N/A                                                   | 10 <sup>-16</sup>                          |
| NH <sub>4</sub> <sup>+</sup> , “curled”<br>(183)            | N/A                                      | 0.045                         | 10 <sup>-16</sup>                                     | N/A                                        |

The null hypothesis was that P $\alpha$ -P $\gamma$  distances are similar for the  $\alpha\beta\gamma$ -coordinated and  $\beta\gamma$ -coordinated, “curled” Mg-ATP complexes.

\* The null hypothesis was NOT rejected, no significant difference between samples

## References

1. Chappie JS, Acharya S, Leonard M, Schmid SL, Dyda F. G domain dimerization controls dynamin's assembly-stimulated GTPase activity. *Nature*. 2010;465:435-440. doi: 10.1038/nature09032.
2. Yan L, Ma Y, Sun Y, Gao J, Chen X, Liu J, et al. Structural basis for mechanochemical role of *Arabidopsis thaliana* dynamin-related protein in membrane fission. *J Mol Cell Biol*. 2011;3:378-381. doi: 10.1093/jmcb/mjr032.
3. Manikas RG, Thomson E, Thoms M, Hurt E. The K<sup>+</sup>-dependent GTPase Nug1 is implicated in the association of the helicase Dbp10 to the immature peptidyl transferase centre during ribosome maturation. *Nucleic Acids Res*. 2016;44:1800-1812. doi: 10.1093/nar/gkw045.
4. Achila D, Gulati M, Jain N, Britton RA. Biochemical characterization of ribosome assembly GTPase RbgA in *Bacillus subtilis*. *J Biol Chem*. 2012;287:8417-8423. doi: 10.1074/jbc.M111.331322.
5. Daigle DM, Brown ED. Studies of the interaction of *Escherichia coli* YjeQ with the ribosome in vitro. *J Bacteriol*. 2004;186:1381-1387.
6. Fasano O, De Vendittis E, Parmeggiani A. Hydrolysis of GTP by elongation factor Tu can be induced by monovalent cations in the absence of other effectors. *J Biol Chem*. 1982;257:3145-3150.
7. Ebel C, Guinet F, Langowski J, Urbanke C, Gagnon J, Zaccai G. Solution studies of elongation factor Tu from the extreme halophile *Halobacterium marismortui*. *J Mol Biol*. 1992;223:361-371. doi: 0022-2836(92)90737-5.
8. Kuhle B, Ficner R. A monovalent cation acts as structural and catalytic cofactor in translational GTPases. *EMBO J*. 2014;33:2547-2563. doi: 10.15252/embj.201488517.
9. Dubnoff JS, Maitra U. Characterization of the ribosome-dependent guanosine triphosphatase activity of polypeptide chain initiation factor IF 2. *J Biol Chem*. 1972;247:2876-2883.
10. Scrima A, Wittinghofer A. Dimerisation-dependent GTPase reaction of MnmE: how potassium acts as GTPase-activating element. *EMBO J*. 2006;25:2940-2951. doi: 10.1038/sj.emboj.7601171.
11. Ash MR, Guilfoyle A, Clarke RJ, Guss JM, Maher MJ, Jormakka M. Potassium-activated GTPase reaction in the G protein-coupled ferrous iron transporter B. *J Biol Chem*. 2010;285:14594-14602. doi: 10.1074/jbc.M110.111914.
12. Tomar SK, Kumar P, Prakash B. Deciphering the catalytic machinery in a universally conserved ribosome binding ATPase YchF. *Biochem Biophys Res Commun*. 2011;408:459-464. doi: 10.1016/j.bbrc.2011.04.052.
13. Rafay A, Majumdar S, Prakash B. Exploring potassium-dependent GTP hydrolysis in TEES family GTPases. *FEBS Open Bio*. 2012;2:173-177. doi: 10.1016/j.fob.2012.07.008.
14. Foucher AE, Reiser JB, Ebel C, Housset D, Jault JM. Potassium acts as a GTPase-activating element on each nucleotide-binding domain of the essential *Bacillus subtilis* EngA. *PLoS One*. 2012;7:e46795. doi: 10.1371/journal.pone.0046795.
15. Hwang J, Inouye M. An essential GTPase, Der, containing double GTP-binding domains from *Escherichia coli* and *Thermotoga maritima*. *J Biol Chem*. 2001;276:31415-31421. doi: 10.1074/jbc.M104455200.
16. Moreau M, Lee GI, Wang Y, Crane BR, Klessig DF. AtNOS/AtNOA1 is a functional *Arabidopsis thaliana* cGTPase and not a nitric-oxide synthase. *J Biol Chem*. 2008;283:32957-32967. doi: 10.1074/jbc.M804838200.
17. Anand B, Surana P, Prakash B. Deciphering the catalytic machinery in 30S ribosome assembly GTPase YqeH. *PLoS One*. 2010;5:e9944. doi: 10.1371/journal.pone.0009944.



18. Perez-Arellano I, Spinola-Amilibia M, Bravo J. Human Drg1 is a potassium-dependent GTPase enhanced by Lerep4. *FEBS J.* 2013;280:3647-3657. doi: 10.1111/febs.12356.
19. Villarroya M, Prado S, Esteve JM, Soriano MA, Aguado C, Perez-Martinez D, et al. Characterization of human GTPBP3, a GTP-binding protein involved in mitochondrial tRNA modification. *Mol Cell Biol.* 2008;28:7514-7531. doi: 10.1128/MCB.00946-08.
20. Sehorn MG, Sigurdsson S, Bussen W, Unger VM, Sung P. Human meiotic recombinase Dmc1 promotes ATP-dependent homologous DNA strand exchange. *Nature.* 2004;429:433-437. doi: 10.1038/nature02563.
21. Liu Y, Stasiak AZ, Masson JY, McIlwraith MJ, Stasiak A, West SC. Conformational changes modulate the activity of human RAD51 protein. *J Mol Biol.* 2004;337:817-827. doi: 10.1016/j.jmb.2004.02.022.
22. Shim KS, Schmutte C, Yoder K, Fishel R. Defining the salt effect on human RAD51 activities. *DNA Repair (Amst).* 2006;5:718-730. doi: 10.1016/j.dnarep.2006.03.006.
23. Rice KP, Eggler AL, Sung P, Cox MM. DNA pairing and strand exchange by the *Escherichia coli* RecA and yeast Rad51 proteins without ATP hydrolysis: on the importance of not getting stuck. *J Biol Chem.* 2001;276:38570-38581. doi: 10.1074/jbc.M105678200.
24. Amunugama R, He Y, Willcox S, Forties RA, Shim KS, Bundschuh R, et al. RAD51 protein ATP cap regulates nucleoprotein filament stability. *J Biol Chem.* 2012;287:8724-8736. doi: 10.1074/jbc.M111.239426.
25. Li Y, He Y, Luo Y. Conservation of a conformational switch in RadA recombinase from *Methanococcus maripaludis*. *Acta Crystallogr D Biol Crystallogr.* 2009;65:602-610. doi: 10.1107/S0907444909011871.
26. Lowenstein JM. The stimulation of transphosphorylation by alkali-metal ions. *Biochem J.* 1960;75:269-274.
27. Sigel A, Sigel H, Sigel RKO, editors. *The Alkali Metal Ions: Their Role for Life*: Springer; 2016.
28. Smith RM, Martell AE, Chen Y. Critical-evaluation of stability-constants for nucleotide complexes with protons and metal-Ions and the accompanying enthalpy changes. *Pure Appl Chem.* 1991;63:1015-1080. doi: DOI 10.1351/pac199163071015.
29. De Stefano C, Milea D, Pettignano A, Sammartano S. Modeling ATP protonation and activity coefficients in NaCl<sub>aq</sub> and KCl<sub>aq</sub> by SIT and Pitzer equations. *Biophys Chem.* 2006;121:121-130. doi: 10.1016/j.bpc.2005.12.016.
30. Stellwagen E, Stellwagen NC. Quantitative analysis of cation binding to the adenosine nucleotides using the variable ionic strength method: Validation of the Debye-Hückel-Onsager theory of electrophoresis in the absence of counterion binding. *Electrophoresis.* 2007;28:1053-1062.
31. Vanommeslaeghe K, Hatcher E, Acharya C, Kundu S, Zhong S, Shim J, et al. CHARMM General Force Field (CGenFF): A force field for drug-like molecules compatible with the CHARMM all-atom additive biological force fields. *J Comput Chem.* 2010;31:671-690. doi: 10.1002/Jcc.21367.
32. Blackburn GM, Cherfils J, Moss GP, Richards NGJ, Waltho JP, Williams NH, et al. How to name atoms in phosphates, polyphosphates, their derivatives and mimics, and transition state analogues for enzyme-catalysed phosphoryl transfer reactions (IUPAC Recommendations 2016). *Pure Appl Chem.* 2017;89:653-675. doi: 10.1515/pac-2016-0202.
33. Golcnik M. Metallic fluoride complexes as phosphate analogues for structural and mechanistic studies of phosphoryl group transfer enzymes. *Acta Chimica Slovenica.* 2010;57:272-287.
34. Ash M-R, Maher MJ, Guss JM, Jormakka M. The cation-dependent G-proteins: in a class of their own. *FEBS Lett.* 2012;586:2218-2224. .
35. Klare JP. Site-directed spin labeling EPR spectroscopy in protein research. *Biol Chem.* 2013;394:1281-1300. doi: 10.1515/hsz-2013-0155.

36. Qian X, He Y, Wu Y, Luo Y. Asp302 determines potassium dependence of a RadA recombinase from *Methanococcus voltae*. *J Mol Biol.* 2006;360:537-547. doi: 10.1016/j.jmb.2006.05.058.
37. Chen Z, Yang H, Pavletich NP. Mechanism of homologous recombination from the RecA-ssDNA/dsDNA structures. *Nature.* 2008;453:489-484. doi: 10.1038/nature06971.
38. Tu C, Zhou X, Tropea JE, Austin BP, Waugh DS, Court DL, et al. Structure of ERA in complex with the 3' end of 16S rRNA: implications for ribosome biogenesis. *Proc Natl Acad Sci USA.* 2009;106:14843-14848. doi: 10.1073/pnas.0904032106.
39. Tu C, Zhou X, Tarasov SG, Tropea JE, Austin BP, Waugh DS, et al. The Era GTPase recognizes the GAUCACCUCC sequence and binds helix 45 near the 3' end of 16S rRNA. *Proc Natl Acad Sci USA.* 2011;108:10156-10161. doi: 10.1073/pnas.1017679108.
